# Supplementary material for: Genetic basis and dual adaptive role of floral pigmentation in sunflowers
Source: eLife. 2022 Jan 18;11:e72072. doi: 10.7554/eLife.72072 (PMC8765750; doi:10.7554/eLife.72072)
Supplement: Figure 1—source data 1. [file elife-72072-fig1-data1.xlsx]

## Sheet: Populations
Figure 1 - source data 1: Population used in this study, average LUVp values, environmental variables and inflorescence traits.
Population_name	Population_AKA	Species	Subsp	Accession_nr	Vaucer	Herbarium	Country	State/Province	Latitude	Longitude	Elevation (m)	LUVp_common_garden_2016	LUVp_common_garden_2019	Mean_LUVp_2016_2019	MAT	MWMT	MCMT	TD	Tave_sm	MAP	MSP	PPT_sm	AHM	SHM	MAR	Rad_sm	Eref	Eref_sm	CMD	CMD_sm	RH	RH_sm	UV_annual_mean	UV_highest_month	UV_sm	Disk_diameter (cm)	Ligule_length (cm)	Ligule_width (cm)	Flower_head_diameter (cm)	Ligule_Lenght/width_ratio	Relative_ligule_size	Ligules_number
ANN_01	DB_1794	Helianthus annuus	annuus	PI 695647	1794	IND	United States	California	38.5654	-121.638	6	0.734204	0.79583	0.765017	16	24.3	7.2	17.1	23.4	461	22	6	56.6	1121	16.9	26.6	1331	589	1029	583	56	46	3057.35	5917.6	15120.6	4.46898	4.68808	1.74151	13.6676	2.87163	3.06989	22.1917
ANN_02	DB_1796	Helianthus annuus	annuus	PI 695648	1796	IND	United States	California	36.595	-120.758	295	0.771034	0.736821	0.753928	15.7	24.9	7.5	17.4	23.5	227	17	3	113.3	1501.9	18.1	26.9	1449	626	1223	623	50	43	3358.36	6168.76	16226.1	4.17575	4.99475	1.71169	13.6724	2.98035	3.30465	21.8333
ANN_03	DB_1797	Helianthus annuus	annuus	PI 695649	1797	IND	United States	California	36.2454	-120.317	295	0.932214	0.949631	0.940922	16.5	26.5	7.2	19.3	25.1	218	16	2	121.9	1681.4	18.3	27.1	1452	624	1239	622	53	47	3421.28	6072.56	16548.3	4.46022	4.68487	1.80547	13.445	2.70554	3.03338	23.4148
ANN_04	DB_1798	Helianthus annuus	annuus	PI 695650	1798	IND	United States	California	34.7509	-119.072	1560	0.74996	0.784756	0.767358	10.5	19.8	3.2	16.6	18.3	564	32	7	36.3	623.1	18.9	25.9	1295	560	950	553	45	40	3671.11	6236.75	17429.4	3.23819	5.16942	1.80141	13.0883	2.91181	4.11936	17.8405
ANN_05	DB_1799	Helianthus annuus	annuus	PI 695651	1799	IND	United States	California	33.6928	-116.184	-14	0.673523	0.713246	0.693385	22.4	33	12.3	20.8	31.6	78	23	14	415.8	1407.6	19.3	26.5	1801	697	1724	684	50	53	3750.05	6199.65	17223.1	4.14077	5.17135	1.91454	14.0928	2.74317	3.43647	20.9667
ANN_06	DB_1800	Helianthus annuus	annuus	PI 695652	1800	IND	United States	California	34.2498	-117.451	738	0.680086	0.748458	0.714272	16.1	24.6	9.6	15	22.9	674	55	14	38.8	447.9	18.1	25.3	1383	562	946	548	56	52	3713.54	6281.25	17382.8	4.22706	6.20147	1.83643	16.1829	3.41271	3.86687	20.7
ANN_07	DB_1802	Helianthus annuus	annuus	PI 695653	1802	IND	United States	California	38.7892	-119.936	2330	0.856601	0.838208	0.847405	4.6	14.4	-2.9	17.3	12.9	1051	158	74	13.9	91.2	17.4	27.1	727	391	418	315	54	53	3596.94	6610.03	17623.9	3.57048	4.9686	1.57841	13.0999	3.22034	3.7112	17.8833
ANN_08	DB_1803	Helianthus annuus	annuus	PI 695654	1803	IND	United States	California	38.6772	-119.739	1710	0.776047	NA	0.776047	7.4	17.9	-1.1	19	16.3	653	108	55	26.6	165.1	16.6	25.9	1030	500	712	444	45	42	3680.87	6640.09	17801	3.25159	4.80046	1.58444	12.4731	3.04174	3.83072	16.9417
ANN_09	DB_1804	Helianthus annuus	annuus	PI 695655	1804	IND	United States	California	37.4332	-118.406	1270	0.789632	0.964058	0.876845	13.5	24.9	3.3	21.7	23.5	120	25	13	195.6	1013.3	19.4	27.4	1475	649	1354	636	40	39	3628.07	6376.47	17513.5	3.84788	4.20893	1.43464	11.7774	2.94528	3.07306	22.5333
ANN_10	DB_1805	Helianthus annuus	annuus	PI 695656	1805	IND	United States	California	37.1735	-118.279	1205	0.914374	0.986647	0.95051	14.3	26	3.9	22.1	24.4	135	27	15	179.4	962.7	18.5	26.6	1460	638	1323	622	44	43	3441.06	6145.04	16715.2	3.58375	4.00581	1.34941	11.4356	2.98675	3.18904	23.5333
ANN_11	DB_1806	Helianthus annuus	annuus	PI 695657	1806	IND	United States	Arizona	35.1957	-114.067	1030	0.865588	0.885198	0.875393	16.5	28.3	6.1	22.1	26.7	266	99	62	99.8	285.5	20	27	1424	592	1160	530	54	55	3727.54	6466.66	17732.1	5.99317	6.32462	1.94377	18.1029	3.25943	3.02952	29.3833
ANN_12	DB_1807	Helianthus annuus	annuus	PI 695658	1807	IND	United States	Arizona	35.2533	-112.134	2115	0.794713	0.687423	0.741068	8.3	19.5	-1.7	21.2	17.9	536	222	158	34.1	87.6	18.9	25.6	1109	511	674	352	45	47	3484.59	6185.42	16445.5	4.89318	5.39234	1.78675	15.0473	3.14138	3.13479	26.7333
ANN_13	DB_1811	Helianthus annuus	annuus	PI 695661	1811	IND	United States	Arizona	34.7506	-112.017	1005	0.534494	NA	0.534494	16.4	28.1	5.9	22.2	26.5	328	157	106	80.4	178.6	17.9	24.4	1560	642	1233	536	47	49	3584.33	6194.13	16790	4.14071	4.35781	1.53539	12.4642	2.86261	3.01609	21.287
ANN_14	DB_1813	Helianthus annuus	annuus		1813	IND	United States	Arizona	36.1086	-111.242	1410	0.822997	NA	0.822997	13.2	26.3	0	26.3	24.7	155	68	39	149.5	384.2	17.9	24.8	1329	596	1185	557	49	50	3567.58	6250.57	16889.2	4.32081	5.4144	1.83353	14.9922	2.98818	3.48105	26.3
ANN_15	DB_1815	Helianthus annuus	annuus	PI 695665	1815	IND	United States	Arizona	35.0385	-110.735	1515	0.851811	0.936495	0.894153	12.6	25.5	-0.5	26	23.9	201	106	74	112.4	241.6	18.7	25.2	1334	589	1143	515	48	50	3675.5	6410.07	17245.6	5.19423	5.38842	1.9942	15.5912	2.72388	3.01211	25.7315
ANN_16	DB_1817	Helianthus annuus	annuus	PI 695667	1817	IND	United States	New Mexico	35.4004	-108.236	2180	0.915989	0.958745	0.937367	8.3	20.1	-3	23.2	18.7	323	170	119	56.5	118.3	19	25.5	1070	512	813	393	45	49	3525.37	6195.32	16318.7	4.77785	5.88356	1.74976	16.1061	3.39854	3.40618	25.8
ANN_17	DB_1818	Helianthus annuus	annuus	PI 695668	1818	IND	United States	New Mexico	35.245	-107.686	2425	0.824977	0.906619	0.865798	8.1	18.9	-2.2	21.1	17.7	355	204	143	50.8	92.5	19.5	26.3	1017	487	720	345	50	50	3681.35	6287.82	17069.9	5.46251	5.24325	1.87866	15.5671	2.82941	2.9269	25.8667
ANN_18	DB_1820	Helianthus annuus	annuus	PI 695670	1820	IND	United States	New Mexico	36.0731	-104.289	1810	0.892061	0.92515	0.908605	10.7	22.1	-0.5	22.7	20.9	391	288	202	52.9	76.9	18.6	25.2	1200	523	816	321	47	52	3509.42	5996.82	16574.2	5.40574	4.70504	1.23039	14.5522	3.87718	2.71175	32.3333
ANN_19	DB_1822	Helianthus annuus	annuus	PI 695672	1822	IND	United States	New Mexico	36.7268	-104.019	2090	0.966639	1	0.98332	8.9	20.1	-1.5	21.7	18.8	413	319	213	45.7	63	18.2	25	1071	489	677	276	47	52	3402.24	5793.59	15879.2	5.55824	4.86061	1.34845	14.934	3.62291	2.6914	29.1083
ANN_20	DB_1827	Helianthus annuus	annuus	PI 695677	1827	IND	United States	Colorado	38.4437	-107.629	2390	0.832339	0.907313	0.869826	6.2	18.5	-5.3	23.8	16.9	402	175	102	40.2	105.8	18.6	25.9	849	458	566	356	50	51	4008.85	7024.23	19179	4.84956	5.07677	1.46415	14.7275	3.53965	3.0713	24.8333
ANN_21	DB_1828	Helianthus annuus	annuus	PI 695678	1828	IND	United States	Colorado	38.91	-108.374	1525	0.641699	0.702629	0.672164	10.7	24.5	-3.9	28.5	22.7	260	111	59	79.7	221.8	17	25.1	1118	542	890	482	52	52	3211.87	5722.41	15336.1	4.78336	5.34734	1.72738	15.2404	3.14048	3.19558	26
ANN_22	DB_1829	Helianthus annuus	annuus	PI 695679	1829	IND	United States	Colorado	39.0067	-108.464	1460	0.707068	NA	0.707068	11.1	25.2	-3.8	29	23.4	221	99	53	95.5	255.7	17.6	25.6	1138	550	942	498	52	52	3216.19	5847.36	15557.2	4.99508	5.45446	1.64407	15.5295	3.3885	3.13643	25.8
ANN_23	DB_1830	Helianthus annuus	annuus	PI 695680	1830	IND	United States	Nevada	40.6626	-116.239	1790	0.640024	0.67146	0.655742	8.7	22.2	-2.6	24.8	20	290	106	50	64.3	209.3	17	26.1	924	483	713	433	56	53	2981.26	5863.22	15098.1	3.96619	5.72679	1.7994	15.3085	3.2527	3.95461	19.9333
ANN_24	DB_1831	Helianthus annuus	annuus		1831	IND	United States	Nevada	39.4889	-119.995	1540	0.840187	0.815585	0.827886	8.3	19.3	-1	20.3	17.6	474	81	37	38.6	238.7	16.4	26.1	1051	512	802	475	47	43	3217.04	6212.88	16082.2	4.26915	5.25758	1.49412	14.5896	3.54676	3.46237	20.95
ANN_25	DB_1838	Helianthus annuus	annuus	PI 695682	1838	IND	United States	Nevada	36.7965	-114.098	480	0.494557	NA	0.494557	18.4	31.3	6.5	24.7	29.8	153	57	40	185.5	550.9	18.3	25.8	1635	699	1480	658	47	47	3523.25	6258.13	16994.5	3.67747	4.42745	1.82047	12.324	2.4966	3.35948	21.8296
ANN_26	DB_1839	Helianthus annuus	annuus	PI 695683	1839	IND	United States	Utah	37.1373	-113.513	875	0.398779	0.475443	0.437111	16.3	29.3	4.2	25.1	27.6	203	65	40	129.3	449.5	18.1	25.7	1472	639	1268	598	50	50	3430.91	6026.43	16545.2	3.10357	4.40396	1.57529	11.8276	2.84581	3.70116	20.1481
ANN_27	DB_1841	Helianthus annuus	annuus	PI 695685	1841	IND	United States	Utah	37.1314	-112.566	1660	0.881489	0.860631	0.87106	10.7	22.9	-0.5	23.4	21.3	375	130	83	55.2	176	17.7	25.2	1202	550	871	468	48	48	3439.27	6164.06	16560	4.53115	5.30261	1.64404	14.8167	3.29587	3.33307	26.7593
ANN_28	DB_1843	Helianthus annuus	annuus	PI 695687	1843	IND	United States	Utah	38.2165	-112.648	1840	0.725731	NA	0.725731	8.8	21.5	-2.7	24.2	19.8	315	137	84	59.7	157.6	17.1	25.2	1048	525	799	441	47	47	3271.38	6092.2	16191.8	5.00207	5.51295	1.45522	15.7235	3.80304	3.16678	25.3796
ANN_29	DB_1844	Helianthus annuus	annuus	PI 695688	1844	IND	United States	Utah	39.5501	-112.357	1465	0.712265	0.776276	0.74427	9.8	24.1	-3.8	27.9	22	254	106	55	77.7	227.8	17	25.7	1114	570	912	515	47	45	3208.77	6014.58	15983.7	4.85661	6.29965	1.82363	17.0318	3.45721	3.54249	27.1917
ANN_30	DB_1845	Helianthus annuus	annuus	PI 695689	1845	IND	United States	Utah	39.7148	-112.207	1590	0.649086	NA	0.649086	9	23.2	-4	27.2	21.1	287	117	60	66.2	198.2	16.7	25.4	1061	547	834	487	48	46	3102.5	5862.17	15539.2	4.38415	6.07403	1.9577	16.4827	3.14881	3.75488	23.4083
ANN_31	DB_1846	Helianthus annuus	annuus	PI 695690	1846	IND	United States	Utah	40.1781	-111.651	1380	0.568716	NA	0.568716	10.3	24	-2.9	26.9	22	445	157	73	45.7	152.2	16.4	25.2	1091	541	735	468	53	49	3069.35	5794.85	15340.2	4.68449	5.91727	1.67731	16.3826	3.54611	3.51917	28.8519
ANN_32	DB_1847	Helianthus annuus	annuus	PI 695691	1847	IND	United States	Utah	41.4852	-112.056	1295	0.800199	0.966922	0.88356	9.6	23.8	-4.3	28.1	21.8	524	176	77	37.4	135.3	16	25.5	992	519	628	442	55	51	2903.59	5887.88	15031.5	4.68313	5.60141	1.81182	15.5228	3.1919	3.33332	27.0333
ANN_33	DB_1848	Helianthus annuus	annuus	PI 695692	1848	IND	United States	Utah	40.7711	-112.15	1295	0.605651	NA	0.605651	11	25.4	-2.1	27.5	23.2	366	142	68	57.3	178.6	16.7	25.9	999	504	682	436	61	57	2949.47	5863.26	15100.6	4.9045	5.94835	1.79578	16.6239	3.40075	3.38423	29.0333
ANN_34	DB_1849	Helianthus annuus	annuus	PI 695693	1849	IND	United States	Utah	40.6915	-112.264	1295	0.530479	NA	0.530479	10.7	25.1	-2.1	27.2	22.9	430	161	74	48.3	156.1	15.8	25.4	1001	506	635	432	60	56	2943.19	5771.83	14860.4	5.06352	6.74723	1.88007	18.3038	3.63661	3.62448	30.4479
ANN_35	DB_1851	Helianthus annuus	annuus	PI 695695	1851	IND	United States	Utah	40.5127	-109.519	1670	0.757743	NA	0.757743	7.6	22.2	-8.3	30.5	20.3	217	99	51	80.8	225.3	17	25.3	1032	532	850	482	47	46	2917.32	5592.04	14565	4.22138	5.27016	1.73053	14.6366	3.0997	3.50894	22.5667
ANN_36	DB_1852	Helianthus annuus	annuus	PI 695696	1852	IND	United States	Wyoming	41.7743	-107.459	2040	0.752157	0.778818	0.765488	5.5	19.4	-7	26.3	17.5	240	121	70	64.7	160	16	24.3	821	475	655	405	50	47	2917.11	5620.14	14706.5	4.93671	4.90317	1.79468	14.4538	2.78899	2.96358	23.9867
ANN_37	DB_1854	Helianthus annuus	annuus	PI 695698	1854	IND	United States	Colorado	40.4868	-105.096	1550	0.76528	0.825455	0.795368	8.7	21.6	-3.3	24.8	20	373	214	114	50.1	100.9	15.6	22.9	979	491	643	378	48	52	2856.28	5230.77	14067.2	5.10981	4.7424	1.48146	14.2033	3.21098	2.78397	28.075
ANN_38	DB_1861	Helianthus annuus	annuus	PI 695705	1861	IND	United States	Kansas	38.4412	-98.6323	555	0.56832	NA	0.56832	13	27.1	-1.4	28.5	25.6	636	403	252	36.2	67.1	16	23.5	1154	528	532	276	56	60	2955.18	5491.61	14734	5.09213	5.41305	1.62576	15.8429	3.38951	3.12599	31.9333
ANN_39	DB_1864	Helianthus annuus	annuus	PI 695708	1864	IND	United States	Kansas	37.4591	-97.9179	445	0.460704	0.510769	0.485736	14	27.7	-0.3	27.9	26.3	717	435	263	33.5	63.6	15.9	23.2	1189	539	489	275	58	60	3025.67	5692.13	14828	5.06787	5.4474	1.59036	15.7512	3.44323	3.14573	32.7567
ANN_40	DB_1866	Helianthus annuus	annuus	PI 695710	1866	IND	United States	Kansas	37.2333	-98.6646	555	0.480918	0.555263	0.518091	14	27.6	0	27.6	26.2	653	401	243	36.8	68.8	16.1	23.5	1236	555	596	312	54	58	3088.04	5650.9	15230.5	4.94856	5.47744	1.6183	15.5972	3.3272	3.15944	28.4
ANN_41	DB_1871	Helianthus annuus	annuus	PI 695715	1871	IND	United States	Oklahoma	36.8087	-98.2224	355	0.520569	NA	0.520569	15	28.5	0.9	27.6	27.1	703	413	238	35.5	69	16	23.1	1279	557	576	318	57	60	3015.72	5568.99	14792.1	4.70863	5.48789	1.56665	15.569	3.45179	3.26071	29.8021
ANN_42	DB_1875	Helianthus annuus	annuus	PI 695719	1875	IND	United States	Texas	32.9222	-97.3655	235	0.420083	0.459954	0.440019	18.3	29.3	6.3	23	28.4	863	406	201	32.8	72.1	16.5	23.1	1388	555	528	355	62	64	3387.46	5710.02	15340.7	4.66398	5.71724	1.6816	16	3.45138	3.46442	29.2
ANN_43	DB_1876	Helianthus annuus	texanus	PI 695720	1876	IND	United States	Texas	29.7331	-97.6557	145	0.268187	0.253973	0.26108	20.2	29.1	9.9	19.3	28.5	893	428	210	33.9	68	15.9	22.3	1517	568	625	359	62	64	3695.04	5853.05	16297.6	3.7946	5.02235	1.75577	13.7073	2.88043	3.61038	23.3833
ANN_44	DB_1880	Helianthus annuus	texanus	PI 695724	1880	IND	United States	Texas	29.0519	-99.0181	215	0.195851	0.214712	0.205281	20.9	29.2	10.6	18.6	28.8	672	345	187	46	84.6	16.7	23.2	1597	588	925	401	61	63	3862.91	5986.94	16805.5	3.89462	5.24985	1.87958	14.2936	2.85508	3.68584	21.8333
ANN_45	DB_1881	Helianthus annuus	texanus	PI 695725	1881	IND	United States	Texas	28.6308	-100.119	210	0.214122	0.244622	0.229372	21.4	29.8	10.9	18.9	29.4	551	312	164	57.1	95.6	17	23.5	1641	597	1091	433	60	63	4028.36	6171.71	17334.5	3.53631	4.76446	1.41391	12.8779	3.39075	3.6167	21.6333
ANN_46	DB_1919	Helianthus annuus	annuus	PI 695726	1919	IND	United States	California	33.9232	-116.864	690	0.697922	0.759748	0.728835	16.7	25.4	9.7	15.7	23.9	417	59	24	63.9	427.7	18.6	25.7	1494	612	1102	589	52	47	3787.33	6407.32	17864.3	4.33286	5.64702	1.77764	15.2236	3.19531	3.55868	20.7167
ANN_47	DB_1920	Helianthus annuus	annuus	PI 695727	1920	IND	United States	Arizona	32.7316	-111.538	475	0.364925	0.420742	0.392833	20.9	32.3	10.4	21.9	30.9	265	103	74	116.6	314.6	19.5	25.3	1763	679	1498	606	50	54	3978.3	6488.52	18023.5	3.96279	5.2175	1.66245	14.0297	3.18887	3.56965	20.2917
ANN_50	DB_1927	Helianthus annuus	annuus	PI 695734	1927	IND	United States	New Mexico	32.1794	-108.385	1370	0.714871	0.861768	0.788319	15.3	26.1	4.9	21.2	25.1	293	173	129	86.3	151.5	19.9	25.5	1556	611	1262	482	46	51	4098.95	6560.12	18438.1	4.90535	5.63855	1.52927	15.8231	3.74346	3.2301	31.45
ANN_51	DB_1938	Helianthus annuus	annuus	PI 695745	1938	IND	United States	New Mexico	32.1288	-106.674	1170	0.874924	0.831806	0.853365	16.7	27.5	5.9	21.6	26.6	220	142	100	121.3	193.1	19.5	25.6	1574	609	1354	510	49	55	4122.64	6713.65	18530.7	4.01182	5.42868	1.64314	14.7225	3.48357	3.68465	23.5463
ANN_52	DB_1941	Helianthus annuus	annuus	PI 695748	1941	IND	United States	Texas	31.1331	-104.02	1140	0.363883	0.491323	0.427603	16.9	26.5	6.3	20.2	26	349	244	141	77.1	108.4	19.1	25.1	1584	606	1235	465	50	54	4005.35	6375.61	17315.9	4.6152	5.27172	1.58764	14.8682	3.40524	3.24484	24.3417
ANN_53	DB_1942	Helianthus annuus	annuus	PI 695749	1942	IND	United States	Texas	31.0395	-103.137	880	0.426697	0.472063	0.44938	18	27.9	6.8	21.2	27.3	339	219	112	82.5	127.4	19	25.2	1613	607	1273	495	51	57	3934.38	6177.15	17079.2	4.28509	5.03924	1.5881	14.1633	3.21821	3.32214	24.25
ANN_54	DB_1951	Helianthus annuus	texanus	PI 695758	1951	IND	United States	Texas	29.1136	-97.3984	90	0.234478	0.281037	0.257758	21	29.3	11	18.3	28.7	869	450	213	35.6	65	15.8	22.2	1547	566	679	354	63	65	3719.68	5868.96	16280.7	3.56896	4.41532	1.31386	12.197	3.45636	3.44515	24.925
ANN_55	DB_1954	Helianthus annuus	texanus	PI 695761	1954	IND	United States	Texas	28.6606	-96.5835	0	0.204646	0.196173	0.200409	21.3	29	11.8	17.2	28.6	1055	568	295	29.7	51	NA	NA	1340	464	333	170	71	76	3826.06	6029.55	16752.5	3.52886	5.4318	1.78385	14.4124	3.08653	4.09657	22.0667
ANN_56	DB_1956	Helianthus annuus	texanus	PI 695763	1956	IND	United States	Texas	28.0885	-97.0601	1	0.27596	NA	0.27596	21.6	28.8	12.2	16.6	28.4	856	479	230	36.9	60.2	NA	NA	1235	416	416	187	76	81	3948.93	6071.87	17111.1	3.74377	5.35699	1.91498	14.289	2.82582	3.8489	21.7167
ANN_57	DB_1968	Helianthus annuus	texanus	PI 695774	1968	IND	United States	Texas	27.6385	-97.2453	1	0.266519	0.248583	0.257551	22.1	29.1	13	16.1	28.7	807	464	223	39.9	62.7	NA	NA	1198	406	443	183	78	82	4133.06	6278.55	17809.6	3.6387	5.2981	1.76038	14.1229	3.04374	3.89836	24.2083
ANN_58	DB_1973	Helianthus annuus	texanus	PI 695778	1973	IND	United States	Texas	28.2417	-97.6744	35	0.180088	NA	0.180088	21.8	29.5	12.4	17.2	29	781	463	238	40.7	63.8	NA	22.4	1564	560	783	322	64	67	3796.49	5891.64	16463.9	3.47675	4.89002	1.53351	13.1267	3.27396	3.79467	22.6667
ANN_59	DB_1976	Helianthus annuus	texanus	PI 695780	1976	IND	United States	Texas	26.5025	-97.7718	12	0.188599	0.194572	0.191585	22.8	29.2	14.3	14.9	28.8	681	437	206	48.1	66.8	16.7	22.4	1622	557	941	352	65	67	4063.29	6089.69	17140.3	3.52582	4.62563	1.60817	12.6762	2.94453	3.63098	23.05
ANN_60	DB_1981	Helianthus annuus	texanus	PI 695784	1981	IND	United States	Texas	27.2852	-97.6673	1	0.20185	NA	0.20185	22.2	28.9	13.2	15.7	28.5	680	411	210	47.3	70.4	NA	NA	1522	523	842	313	67	70	4026.81	6127.2	17302.6	3.28675	4.78191	1.72309	12.7798	2.85771	3.87286	21.5667
ANN_61	DB_1990	Helianthus annuus	texanus	PI 695789	1990	IND	United States	Texas	27.7765	-97.668	20	0.200294	0.260397	0.230346	21.9	29.4	12.4	17	28.8	756	455	236	42.2	64.6	NA	22.6	1510	531	754	295	67	70	3896.83	6004.61	16793.9	3.88707	5.05141	1.7175	13.6626	2.97952	3.5241	25.13
ANN_62	DB_2157, IA1W	Helianthus annuus	annuus	NA	2157	IND	United States	Iowa	42.2484	-96.0587	325	0.569045	0.520659	0.544852	9.4	24.4	-7.4	31.8	22.9	724	466	284	26.8	52.4	14.1	21.6	936	469	274	186	57	61	2468.46	4994.63	12770.5
ANN_63	DB_2156, IA2W	Helianthus annuus	annuus	NA	2156	IND	United States	Iowa	41.0465	-95.8229	293	0.678488	0.728923	0.703705	10.8	25.3	-5.4	30.7	23.9	810	521	314	25.7	48.6	14.3	21.6	971	477	227	163	58	62	2544.6	4976.61	13116.3
ANN_64	DB_2154, KS1W	Helianthus annuus	annuus	NA	2154	IND	United States	Kansas	39.6889	-99.0661	543	0.540751	0.51423	0.527491	11.3	26.2	-3.8	30.1	24.6	611	401	235	34.9	65.4	15.6	23.4	1068	529	500	294	52	57	2843.85	5473.42	14315.7
ANN_65	DB_2153, KS2W	Helianthus annuus	annuus	NA	2153	IND	United States	Kansas	39.8281	-99.9072	706	0.721378	0.696315	0.708846	10.9	25.6	-3.6	29.1	23.9	594	407	249	35.2	62.7	15.9	23.7	1052	520	488	271	52	57	2892.21	5590.03	14808
ANN_66	DB_2166, MB1W	Helianthus annuus	annuus	NA	2166	UBC	Canada	Manitoba	49.2965	-100.409	505	0.53343	0.673209	0.603319	2.7	19.4	-17.1	36.5	18.1	468	315	211	27.2	61.7	12.8	20.9	674	397	297	186	55	57	1878.17	4352.62	10548.6
ANN_67	DB_2155, MO1W	Helianthus annuus	annuus	NA	2155	IND	United States	Missouri	40.077	-94.8687	320	0.553323	0.580418	0.566871	11.1	25.1	-4.4	29.5	23.7	923	571	341	22.9	44	14.7	21.9	965	469	161	128	60	63	2604.72	5123.98	13389.7
ANN_68	DB_2162, ND1W	Helianthus annuus	annuus	PI 695799	2162	IND	United States	North Dakota	47.2426	-101.043	525	0.800075	0.78132	0.790698	5.2	21.6	-13	34.5	19.9	428	300	199	35.5	71.9	13.2	21.5	756	439	385	240	54	55	2087.58	4664.66	11404.4
ANN_69	DB_2160, SD1W	Helianthus annuus	annuus	NA	2160	IND	United States	South Dakota	44.501	-100.072	546	0.711145	0.726195	0.71867	7.6	24	-9.7	33.6	22.1	460	306	197	38.2	78.3	14.2	22.4	873	485	477	288	52	55	2376.6	5178.92	12728.8
ANN_70	DB_2158, SD2W	Helianthus annuus	annuus	NA	2158	IND	United States	South Dakota	42.8228	-96.7859	374	0.524906	NA	0.524906	8.9	24.5	-8.3	32.8	22.9	644	420	263	29.4	58.3	14.2	21.8	933	476	336	214	56	59	2367.88	4955.23	12328.4
ANN_71	DB_2168, SK1W	Helianthus annuus	annuus	NA	2168	UBC	Canada	Saskatchewan	49.2318	-102.988	585	0.580022	0.697365	0.638694	3.7	20.1	-15	35.1	18.6	417	277	179	32.8	72.6	13.1	21.5	678	399	346	220	57	58	1971.72	4579.06	10814.4
1883	DB_1883	Helianthus annuus	texanus	NA	1883	IND	Mexico	Coahuila	27.0258	-102.102	815	NA	0.194937	0.194937	21	27.8	12.3	15.5	27.7	237	152	83	130.6	182.8	NA	NA	1751	602	1513	519	56	60	4543.56	6482.94	18541.6
1890	DB_1890	Helianthus annuus	texanus	NA	1890	IND	Mexico	Coahuila	26.299	-102.678	860	NA	0.151551	0.151551	21.5	28	12.9	15.1	28	197	140	85	160.3	199.7	NA	NA	1803	611	1608	527	56	60	4691.4	6583.49	19197
1893	DB_1893	Helianthus annuus	texanus	NA	1893	IND	Mexico	Chihuahua	27.0589	-104.795	1390	NA	0.270414	0.270414	18.6	25.4	9.9	15.5	25.4	349	284	199	82	89.4	NA	NA	1783	604	1434	405	48	55	4679.14	6820.04	19428.9
1895	DB_1895	Helianthus annuus	annuus	NA	1895	IND	Mexico	Chihuahua	28.8321	-107.745	1920	NA	0.775485	0.775485	13.8	21.5	6.1	15.4	21.1	493	369	283	48.3	58.3	NA	NA	1556	540	1062	257	44	54	4378.89	6397.42	18422.1
1912	DB_1912	Helianthus annuus	annuus	NA	1912	IND	Mexico	Chihuahua	30.1776	-106.86	1340	NA	0.659245	0.659245	17.2	25.9	8.1	17.9	25.5	258	193	135	105.6	134.8	NA	NA	1691	629	1432	494	47	51	4263.63	6612.77	18394.8
2139	DB_2139	Helianthus annuus	annuus	PI 695790	2139	IND	United States	Oregon	43.7877	-117.692	800	NA	0.646973	0.646973	9.7	22.7	-2.5	25.2	20.8	268	93	54	73.6	243.7	NA	24.6	1057	535	860	482	50	44	2626.79	5766.35	13505.5
2144	DB_2144	Helianthus annuus	annuus	PI 695790	2144	IND	United States	Idaho	45.3236	-116.351	710	NA	0.585488	0.585488	9.5	21.8	-1.8	23.6	20.1	375	155	84	52	141.1	13.1	22.7	975	506	672	422	54	46	2363.3	5350.83	12341.4
2145	DB_2145	Helianthus annuus	annuus	NA	2145	IND	United States	Montana	47.4198	-114.834	770	NA	0.717395	0.717395	8	20.2	-3.6	23.8	18.8	469	193	111	38.3	104.5	13.3	22.4	864	475	552	365	56	46	2185.59	5139.05	11646.8
2149	DB_2149	Helianthus annuus	annuus	NA	2149	IND	United States	Wyoming	44.2105	-107.736	1260	NA	0.789771	0.789771	7.4	22.7	-8.3	31	20.7	210	126	64	83	180.4	15.2	24	963	512	779	448	47	47	2640.55	5369.05	13824.3
2174	DB_2174	Helianthus annuus	annuus	NA	2174	IND	United States	Washington	46.642	-118.859	285	NA	0.760337	0.760337	10.9	22.6	-0.7	23.3	21.2	209	56	26	100.1	407.6	14.5	24.7	969	489	810	463	58	50	2254.68	4978.53	12220.4
AMES-2	AMES 33885	Helianthus annuus	annuus	AMES 33885	NA	NA	United States	North Dakota	47.6465	-101.748	600	NA	0.769431	0.769431	4.5	20.8	-13.7	34.5	19.2	423	299	200	34.2	69.6	13.1	21.6	723	423	358	223	54	56	2064.55	4790.87	11367.1
AMES-3	AMES 34244	Helianthus annuus	annuus	AMES 34244	NA	NA	United States	Oregon	44.619	-120.142	923	NA	0.750585	0.750585	9.3	19.7	-0.2	20	18.3	324	134	76	59.5	147.5	16.2	25.9	936	466	666	390	56	48	2460.46	5506.4	12841.6
PI-10	ANN-1259	Helianthus annuus	annuus	PI 468479	NA	NA	United States	Texas	35.2219	-101.448	1060	NA	0.830241	0.830241	13.9	25.9	1.8	24.1	24.7	529	370	239	45.3	70.2	17.9	25.1	1311	539	783	300	53	58	3469.23	6086.24	16259.4
PI-12	ANN-1285	Helianthus annuus	annuus	PI 468498	NA	NA	United States	Texas	33.5975	-95.8625	185	NA	0.481783	0.481783	17.3	28.3	5.2	23.1	27.5	1102	501	240	24.8	56.4	16.2	22.8	1351	542	362	303	61	64	3213.21	5406.46	14868.2
PI-13	ANN-1393	Helianthus annuus	annuus	PI 468553	NA	NA	United States	New Mexico	32.8886	-105.174	1630	NA	0.737646	0.737646	13.3	23	3.6	19.3	22.1	373	266	189	62.5	86.4	19.5	25.7	1370	540	999	351	50	54	3804.01	5997.67	16622.5
PI-14	ANN-1529	Helianthus annuus	annuus	PI 468632	NA	NA	United States	Oklahoma	35.2578	-96.9364	925	NA	0.420053	0.420053	16.1	28.1	3.2	24.9	27	982	546	299	26.6	51.5	19.2	24.5	1302	540	329	241	59	63	3135.25	5584.94	14770.3
PI-15	1995	Helianthus annuus	annuus	PI 531030	NA	NA	United States	Idaho	44.1333	-111.45	1680	NA	0.717903	0.717903	4.7	17.9	-8.2	26.1	16.2	495	196	105	29.6	91.5	14.8	24	765	444	493	338	50	47	2584.39	5715.4	13552.7
PI-16	ANN-2093	Helianthus annuus	annuus	PI 547168	NA	NA	United States	Illinois	40.05	-91.15	210	NA	0.547469	0.547469	11.3	24.8	-4.1	28.9	23.6	965	524	306	22	47.4	13.9	21.3	939	458	174	152	63	65	2575.38	5052.72	13256.4
PI-17	ANN 2121	Helianthus annuus	annuus	PI 586818	NA	NA	United States	Montana	46.3333	-105.833	750	NA	0.704074	0.704074	7.6	23.6	-8.6	32.3	21.6	339	223	136	51.9	106	13.9	22.6	906	490	602	353	50	51	2268.63	5052.06	12125.4
PI-18	ANN 2137	Helianthus annuus	annuus	PI 586829	NA	NA	United States	Wyoming	43.6667	-106.25	1385	NA	0.777642	0.777642	7.5	22	-5.9	27.9	19.9	338	194	102	51.7	113.1	15.1	24.2	926	492	626	390	49	49	2628.59	5505.62	13681.7
PI-19	ANN-2295	Helianthus annuus	annuus	PI 592305	NA	NA	Canada	Alberta	51.6486	-113.076	821	NA	0.673647	0.673647	3.2	17.2	-12.9	30.1	16.2	396	270	181	33.5	63.7	13.3	21.8	627	366	318	185	55	56	1754.62	4257.99	9924.59
PI-20	ANN-2298	Helianthus annuus	annuus	PI 592308	NA	NA	Canada	Alberta	49.465	-112.596	972	NA	0.580658	0.580658	5	17.9	-9.2	27.1	16.8	415	247	161	36.1	72.4	13.7	22.7	669	391	361	230	55	55	1986.09	4686.59	10936.4
PI-21		Helianthus annuus	annuus	PI 592312	NA	NA	Canada	Saskatchewan	49.9617	-107.757	888	NA	0.648965	0.648965	3.5	18	-13.1	31.2	16.8	357	228	147	37.8	79	14	22.8	650	385	383	238	56	55	1926.99	4696.28	10625.6
PI-24	ANN-1139	Helianthus annuus	annuus	PI 649810	NA	NA	United States	Texas	30.9814	-94.8261	72	NA	0.329992	0.329992	19	28	8.6	19.3	27.4	1293	568	288	22.4	49.2	15.7	21.7	1458	549	355	261	61	64	3439.78	5453.5	15305.7
PI-26	ANN-2507	Helianthus annuus	annuus	PI 649857	NA	NA	United States	Wyoming	41.6586	-105.029	1752	NA	0.82214	0.82214	7.6	20.6	-3.5	24.1	18.8	388	240	146	45.3	85.8	15.6	23.6	925	479	576	333	50	50	2758.9	5284.54	13658.8
PI-27	ANN 1238	Helianthus annuus	annuus	PI 659440	NA	NA	United States	Nebraska	41.2105	-101.649	955	NA	0.79363	0.79363	9.7	24.2	-4.3	28.5	22.4	470	312	184	41.9	77.5	15.2	23.5	1009	508	575	324	50	54	2829.95	5534.65	14503.2
PI-29	ANN-2642	Helianthus annuus	annuus	PI 664746	NA	NA	United States	Missouri	40.2406	-94.4117	276	NA	0.53474	0.53474	11.2	25.2	-4.5	29.6	23.8	926	565	331	22.9	44.5	14.3	21.5	966	469	172	138	60	63	2580.4	4976.08	13184.7
PI-30	ANN-2671	Helianthus annuus	annuus	PI 664770	NA	NA	United States	Kansas	37.3275	-95.7872	303	NA	0.501604	0.501604	13.7	26.6	-0.4	26.9	25.3	994	565	312	23.9	47	15.3	22.4	1155	511	242	199	58	62	2964.92	5428.46	14524.7
PI-31	Eubank 1	Helianthus annuus	annuus	PI 664808	NA	NA	United States	Arkansas	35.7568	-90.014	70	NA	0.523376	0.523376	15.5	27	2.5	24.6	26.1	1272	488	260	20.1	55.4	15.1	21.9	1215	505	297	246	63	65	2991.46	5318.1	14468.7
PI-32	Eubank 2	Helianthus annuus	annuus	PI 664809	NA	NA	United States	Mississippi	33.5521	-91.1062	42	NA	0.324523	0.324523	17.2	27.5	5.4	22.2	26.8	1348	477	261	20.2	57.7	15.6	22.3	1311	517	335	256	63	66	3250.83	5576.4	15186.8
PI-33	20080030	Helianthus annuus	annuus	PI 673220	NA	NA	United States	Nebraska	40.8518	-96.736	380	NA	0.72867	0.72867	10.6	25.4	-5.5	30.9	23.9	738	472	281	27.9	53.9	14.7	21.9	953	471	274	190	59	63	2579.46	5116.61	13333.9
PI-34	HEAN3-SOSMT-060-INDIANBUTTE-06	Helianthus annuus	annuus	PI 673221	NA	NA	United States	Montana	47.53	-108.796	910	NA	0.923641	0.923641	7.2	22.1	-7.9	30	20.2	353	242	142	48.9	91.5	13.9	22.9	793	453	494	311	53	53	2194.42	5000.6	11813.8
PI-35	HEAN3-SOS_OR030-166-10	Helianthus annuus	annuus	PI 673223	NA	NA	United States	Oregon	44.4971	-117.32	962	NA	0.699459	0.699459	9.1	22.1	-3	25.1	20.1	343	115	64	55.6	192.7	15.5	25.1	910	475	684	412	60	52	2552.91	5569.9	13352.1
PI-36	ANN-2755	Helianthus annuus	annuus	PI 673241	NA	NA	United States	New Mexico	34.1423	-105.676	2055	NA	0.783467	0.783467	9.8	20.3	-0.2	20.5	19.2	377	232	162	52.5	87.2	19.4	25.7	1144	492	784	330	51	54	3743.99	6229.77	17063
PI-37	CSST-1	Helianthus annuus	annuus	PI 673264	NA	NA	United States	Texas	30.3805	-96.068	79	NA	0.341636	0.341636	19.8	28.8	9.3	19.5	28.1	1041	461	221	28.6	62.4	15.4	21.5	1466	554	500	333	63	65	3545.72	5708.65	15906.7
PI-39	LBBT-1	Helianthus annuus	annuus	PI 673272	NA	NA	United States	Texas	33.8243	-101.884	1010	NA	0.855802	0.855802	14.9	26	3.3	22.7	25.1	486	339	205	51.2	76.6	18.5	25.3	1404	560	917	355	51	57	3657	6373.01	16960.2
PI-4	A-1617	Helianthus annuus	annuus	PI 413168	NA	NA	United States	Texas	30.5667	-100.643	648	NA	0.548905	0.548905	18.2	27.8	7.4	20.4	27.2	569	332	176	49.6	83.9	16.7	24	1555	582	987	407	55	60	3926.59	6351.84	17193.3
PI-40	ANN-2782	Helianthus annuus	annuus	PI 673279	NA	NA	United States	California	41.4783	-122.348	1066	NA	0.859684	0.859684	9.9	20.1	1	19.2	18.7	716	90	38	27.7	223.5	16	25.9	1067	506	694	468	53	45	2860.22	5981.4	14854.7
PI-6	ANN-527	Helianthus annuus	annuus	PI 435481	NA	NA	United States	New Mexico	35.1553	-103.157	1225	NA	0.831415	0.831415	14.2	26.1	2.5	23.6	25	414	293	192	58.5	89	18.2	25.2	1378	568	964	376	50	55	3608.9	6384.21	17076.6
PI-7	ANN-874	Helianthus annuus	annuus	PI 435613	NA	NA	United States	Kentucky	36.6667	-86.5	220	NA	0.505584	0.505584	14	25.2	1	24.1	24.3	1289	525	310	18.6	48	14.5	20.9	1161	487	226	177	62	64	2834.53	5129.53	13797.5
PI-9	ANN-1200	Helianthus annuus	annuus	PI 468475	NA	NA	United States	Texas	34.7017	-100.186	532	NA	0.537683	0.537683	16.5	28.9	3.7	25.2	27.7	566	357	192	46.9	80.8	17.6	24.5	1420	585	854	394	54	59	3443.1	5914.34	15914.9
PET_01	DB_1808	Helianthus petiolaris	fallax	PI 695659	1808	IND	United States	Arizona	35.1371	-111.642	2140	0.418009			7.9	19.4	-2.5	21.8	17.7	580	222	151	30.8	87.2	18.9	25.3	1049	503	634	352	45	47	3541.46	6427.65	16709
PET_02	DB_1810	Helianthus petiolaris	fallax	PI 695660	1810	IND	United States	Arizona	34.917	-111.91	1445	0.292185			13.5	24.7	3.4	21.3	23.1	440	175	116	53.4	141	19.2	25.4	1394	586	955	471	48	49	3564.41	6226.61	16761.6
PET_03	DB_1812	Helianthus petiolaris	fallax	PI 695662	1812	IND	United States	Arizona	35.3312	-111.541	2075	0.422236			8.4	20	-2.2	22.2	18.4	448	204	144	41.1	98.3	19.2	25.5	1144	531	771	387	43	45	3455.68	6259.43	16231.6
PET_04	DB_1814	Helianthus petiolaris	fallax	PI 695664	1814	IND	United States	Arizona	35.3903	-111.578	2166	0.470432			7.7	19.2	-2.7	21.8	17.6	467	212	146	37.9	90.4	18.5	25.3	1056	510	705	364	44	46	3455.68	6259.43	16231.6
PET_05	DB_1816	Helianthus petiolaris	fallax	PI 695666	1816	IND	United States	Arizona	35.1539	-109.502	1755	0.233667			10.7	23.2	-1.3	24.6	21.6	287	114	74	72.3	203.9	18.6	25.1	1263	578	1033	504	44	46	3680.91	6443.83	17556
PET_06	DB_1819	Helianthus petiolaris	fallax	PI 695669	1819	IND	United States	New Mexico	35.5165	-105.685	2110	0.393932			8.9	20.1	-1.8	22	18.9	419	282	199	45.1	71.5	18.2	24.9	1110	509	722	310	47	49	4153.95	7003.96	19411.9
PET_07	DB_1821	Helianthus petiolaris	fallax	PI 695671	1821	IND	United States	New Mexico	36.4967	-104.57	1795	0.471409			9.8	21.6	-1.9	23.5	20.3	380	291	194	52.2	74.2	18.1	24.8	1195	539	829	345	41	48	3363.83	5689.01	15632.5
PET_08	DB_1823	Helianthus petiolaris	fallax	PI 695673	1823	IND	United States	Colorado	37.529	-105.297	2545	0.445428			5.3	16.8	-5.2	22	15.4	411	213	143	37.4	79	17.8	24.5	854	451	553	307	47	49	4134.51	7213.35	19778.2
PET_09	DB_1824	Helianthus petiolaris	fallax	PI 695674	1824	IND	United States	Colorado	37.6628	-105.641	2325	0.383003			5.6	18.2	-7.5	25.7	16.6	206	133	88	75.7	136.9	17.4	24.3	935	488	762	400	40	45	4011.62	7027.8	19203.2
PET_10	DB_1825	Helianthus petiolaris	fallax	PI 695675	1825	IND	United States	Colorado	38.4775	-106.088	2460	0.389488			5.4	17.1	-5.2	22.3	15.5	278	150	103	55.5	114.1	15.3	23.1	844	450	628	347	48	49	4036.38	7020.89	19267.5
PET_11	DB_1826	Helianthus petiolaris	fallax	PI 695676	1826	IND	United States	Colorado	38.4895	-107.038	2295	0.352281			3.7	17.2	-11.2	28.4	15.6	232	120	80	59.4	143.1	17.5	24.9	892	495	738	415	38	41	4079.34	7132.88	19507.8
PET_12	DB_1840	Helianthus petiolaris	fallax	PI 695684	1840	IND	United States	Arizona	36.9	-112.919	1570	0.258723			12	24.1	0.7	23.4	22.6	308	121	85	71.4	200	18.4	25.7	1275	564	966	480	49	49	3395.55	6204.38	16396.7
PET_13	DB_1842	Helianthus petiolaris	fallax	PI 695686	1842	IND	United States	Utah	37.2379	-112.851	1805	0.266021			9.9	22.2	-0.9	23	20.5	430	139	91	46.4	159.7	19.1	26	1102	524	769	433	50	50	3408.51	6024.95	16370.2
PET_14	DB_1850	Helianthus petiolaris	petiolaris	PI 695694	1850	IND	United States	Utah	40.5504	-109.916	2140	0.356827			5.1	18.7	-8.1	26.8	16.8	402	179	98	37.5	104.5	17.5	25.8	803	455	542	357	49	50	3408.13	6365.34	16935.3
PET_15	DB_1853	Helianthus petiolaris	petiolaris	PI 695697	1853	IND	United States	Colorado	40.6971	-105.612	2240	0.361287			5.2	16.9	-4.6	21.6	15.2	347	208	124	43.7	81.3	16.3	23.6	815	446	525	322	48	47	3642.76	6678.5	18149.1
PET_16	DB_1855	Helianthus petiolaris	petiolaris	PI 695699	1855	IND	United States	Colorado	40.3805	-104.523	1415	0.268796			9.3	23	-3.8	26.8	21.4	329	208	113	58.7	110.6	15.8	23.1	1043	524	740	411	46	50	2963.2	5764.73	14851.1
PET_17	DB_1856	Helianthus petiolaris	petiolaris	PI 695700	1856	IND	United States	Colorado	40.1516	-104.603	1510	0.257461			9.5	22.8	-3	25.8	21.2	341	211	116	57.2	108.3	16	23.3	1043	520	732	405	47	50	2997.71	5638.92	15038.5
PET_18	DB_1857	Helianthus petiolaris	petiolaris		1857	IND	United States	Colorado	39.9137	-104.615	1595	0.269719			9.8	22.8	-2	24.8	21.2	369	237	141	53.6	96.3	16.2	23.4	1053	507	705	366	49	53	3020.76	5611.18	14822.5
PET_19	DB_1858	Helianthus petiolaris	petiolaris	PI 695702	1858	IND	United States	Colorado	39.6371	-104.335	1720	0.265394			9.4	22.4	-1.9	24.3	20.7	400	262	166	48.6	85.3	16.6	23.9	1015	505	648	340	48	52	3044.19	5773.27	15005.1
PET_20	DB_1859	Helianthus petiolaris	petiolaris	PI 695703	1859	IND	United States	Kansas	38.3336	-98.8381	585	0.226788			13.2	27.1	-1.2	28.3	25.7	624	401	252	37.1	67.7	16.1	23.6	1162	530	549	279	56	60	3000.57	5619.92	14991.5
PET_21	DB_1860	Helianthus petiolaris	petiolaris	PI 695704	1860	IND	United States	Kansas	38.3335	-98.6916	570	0.235747			13.2	27.1	-1.2	28.4	25.7	632	404	254	36.7	67.1	16.1	23.6	1159	529	539	275	56	60	2955.18	5491.61	14734
PET_22	DB_1862	Helianthus petiolaris	petiolaris	PI 695706	1862	IND	United States	Kansas	38.565	-97.9617	465	0.221173			12.6	26.7	-2.1	28.8	25.3	672	428	264	33.6	62.4	15.6	23.1	1092	515	450	250	57	61	2919.3	5478.01	14818.1
PET_23	DB_1863	Helianthus petiolaris	petiolaris	PI 695707	1863	IND	United States	Kansas	37.676	-97.4065	404	0.207806			13.5	27.3	-1	28.3	25.8	747	452	266	31.5	60.4	15.6	22.9	1129	513	406	246	60	63	2966.01	5491.09	14558.9
PET_24	DB_1865	Helianthus petiolaris	petiolaris	PI 695709	1865	IND	United States	Kansas	37.3794	-97.8877	415	0.248689			14.3	27.8	0	27.8	26.5	723	437	263	33.5	63.7	15.8	23.1	1228	541	503	277	58	60	3025.67	5692.13	14828
PET_25	DB_1867	Helianthus petiolaris	petiolaris	PI 695711	1867	IND	United States	Oklahoma	36.8337	-98.6481	415	0.248446			14.8	28.4	0.9	27.5	27	659	389	218	37.7	72.8	16.3	23.4	1308	564	647	346	55	59	3107.7	5705.1	15240.3
PET_26	DB_1868	Helianthus petiolaris	petiolaris	PI 695712	1868	IND	United States	Oklahoma	36.5634	-98.8894	465	0.171109			14.9	28.3	1.1	27.2	26.9	637	385	205	39.1	73.4	16.4	23.6	1307	559	672	354	55	59	3165.42	5688.84	15214.8
PET_27	DB_1869	Helianthus petiolaris	petiolaris	PI 695713	1869	IND	United States	Oklahoma	36.558	-98.8954	470	0.162422			14.9	28.3	1.1	27.2	26.9	637	385	205	39.1	73.4	16.5	23.6	1307	559	671	354	55	59	3165.42	5688.84	15214.8
PET_28	DB_1870	Helianthus petiolaris	petiolaris	PI 695714	1870	IND	United States	Oklahoma	36.7993	-98.2497	350	0.173238			15	28.5	0.9	27.6	27.2	697	408	235	35.9	69.9	16	23.1	1286	559	588	324	57	60	3015.72	5568.99	14792.1
PET_29	DB_1872	Helianthus petiolaris	petiolaris		1872	IND	United States	Oklahoma	36.9134	-99.2354	480	0.198711			14.6	28.2	0.8	27.3	26.7	616	376	217	40	74.9	16.3	23.6	1328	571	711	354	52	57	3139.58	5681.61	15320.2
PET_30	DB_1873	Helianthus petiolaris	petiolaris	PI 695717	1873	IND	United States	Oklahoma	36.4075	-99.5559	660	0.198866			14.3	27.4	0.9	26.6	26.1	614	379	217	39.6	72.3	16.9	24.1	1271	542	658	325	55	60	3216.57	5730.43	15485.7
PET_31	DB_1874	Helianthus petiolaris	petiolaris	PI 695718	1874	IND	United States	Texas	35.1947	-100.724	900	0.198951			14.8	26.8	2.6	24.3	25.5	546	360	213	45.4	74.5	17.9	25	1328	545	782	332	54	59	3411	5963.55	16083
PET_32	DB_1922	Helianthus petiolaris	fallax	PI 695729	1922	IND	United States	Arizona	31.743	-110.689	1475	0.297813			15.5	24.5	6.9	17.6	23.7	516	290	229	49.4	84.5	20.3	25.2	1459	558	943	328	52	56	4007.63	6455.86	17654.2
PET_33	DB_1923	Helianthus petiolaris	fallax		1923	IND	United States	Arizona	31.4759	-110.258	1440	0.356577			16.4	25.2	7.7	17.5	24.6	405	245	195	65	102.8	19.8	24.9	1461	554	1057	359	55	58	4046.39	6509.66	17858
PET_34	DB_1925	Helianthus petiolaris	fallax	PI 695732	1925	IND	United States	Arizona	31.3809	-110.069	1315	0.274595			16.9	26	8	18.1	25.4	345	215	170	77.8	121	19.9	24.9	1501	568	1155	398	54	58	4112.84	6646.15	18336.3
PET_35	DB_1926	Helianthus petiolaris	fallax	PI 695733	1926	IND	United States	Arizona	31.6889	-109.134	1345	0.285852			15.7	25.6	6.2	19.4	24.7	351	203	156	73.3	126.6	19.4	24.8	1566	596	1216	440	47	53	4051.49	6586.82	17894.4
PET_43	DB_1937	Helianthus petiolaris	fallax	PI 695744	1937	IND	United States	New Mexico	32.4262	-106.548	1615	0.298308			15.7	25.4	5.6	19.8	24.8	361	217	164	71.2	117	20.5	26.2	1372	549	1011	384	58	59	4086.34	6638.64	18399.3
PET_46	DB_1943	Helianthus petiolaris	fallax	PI 695750	1943	IND	United States	Texas	31.4399	-102.875	765	0.122094			18.3	28.7	6.6	22.1	28	333	215	106	85	133.4	18.9	25.2	1629	616	1297	511	51	57	3954.65	6399.21	17419.9
PET_47	DB_1944	Helianthus petiolaris	fallax	PI 695751	1944	IND	United States	Texas	31.6366	-102.817	840	0.088261			18	28.3	6.3	22	27.6	336	219	109	83.2	129.1	18.9	25.3	1596	607	1260	497	51	57	3958.72	6466.94	17630.3
PET_48	DB_1945	Helianthus petiolaris	fallax	PI 695752	1945	IND	United States	Texas	31.7185	-103.032	840	0.150758			18	28.3	6.4	21.9	27.7	326	216	119	86	130.9	18.9	25.2	1602	608	1276	489	51	57	3998.21	6363.36	17746.3
PET_49	DB_1946	Helianthus petiolaris	fallax	PI 695753	1946	IND	United States	Texas	31.9535	-102.979	925	0.108891			17.4	27.7	5.9	21.8	27.1	336	225	126	81.6	122.8	18.9	25.3	1572	602	1236	476	51	57	3948.98	6453.72	17702.8
PET_50	DB_1947	Helianthus petiolaris	fallax	PI 695754	1947	IND	United States	Texas	32.5094	-102.046	905	0.228449			16.7	27.2	5.2	22	26.5	443	294	162	60.3	92.3	19.1	25.4	1486	579	1043	416	53	58	3821.89	6456.69	17420.3
NIV_36	DB_1928	Helianthus niveus	canescens	PI 695735	1928	IND	United States	New Mexico	32.1963	-107.687	1300
NIV_37	DB_1929	Helianthus niveus	canescens	PI 695736	1929	IND	United States	New Mexico	31.8201	-107.388	1250
NIV_38	DB_1930	Helianthus niveus	canescens	PI 695737	1930	IND	United States	New Mexico	31.7901	-107.204	1265
NIV_39	DB_1931	Helianthus niveus	canescens	PI 695738	1931	IND	United States	New Mexico	31.8115	-106.683	1265
NIV_40	DB_1933	Helianthus niveus	canescens		1933	IND	United States	Texas	31.9985	-106.584	1200
NIV_41	DB_1934	Helianthus niveus	canescens	PI 695741	1934	IND	United States	New Mexico	32.2421	-107.063	1345
NIV_42	DB_1935	Helianthus niveus	canescens	PI 695742	1935	IND	United States	New Mexico	32.2683	-106.959	1350
NIV_44	DB_1939	Helianthus niveus	canescens	PI 695746	1939	IND	United States	Texas	31.1503	-105.687	1070
NIV_45	DB_1940	Helianthus niveus	canescens	PI 695747	1940	IND	United States	Texas	31.0562	-104.571	1210
ARG_01	DB_1877	Helianthus argophyllus		PI 695721	1877	IND	United States	Texas	29.6465	-97.6909	133
ARG_02	DB_1878	Helianthus argophyllus		PI 695722	1878	IND	United States	Texas	29.439	-97.7384	125
ARG_03	DB_1879	Helianthus argophyllus		PI 695723	1879	IND	United States	Texas	29.3194	-97.7441	105
ARG_04	DB_1948	Helianthus argophyllus			1948	IND	United States	Texas	29.6015	-97.7088	140
ARG_05	DB_1949	Helianthus argophyllus		PI 695756	1949	IND	United States	Texas	29.4513	-97.6954	104
ARG_06	DB_1950	Helianthus argophyllus		PI 695757	1950	IND	United States	Texas	29.2719	-97.6697	100
ARG_07	DB_1952	Helianthus argophyllus		PI 695759	1952	IND	United States	Texas	28.7001	-97.3877	50
ARG_08	DB_1953	Helianthus argophyllus		PI 695760	1953	IND	United States	Texas	28.7367	-97.0315	20
ARG_09	DB_1955	Helianthus argophyllus		PI 695762	1955	IND	United States	Texas	28.1814	-96.9948	4
ARG_10	DB_1958	Helianthus argophyllus		PI 695764	1958	IND	United States	Texas	28.1081	-97.0288	7
ARG_11	DB_1959	Helianthus argophyllus		PI 695765	1959	IND	United States	Texas	27.9971	-97.0764	0
ARG_12	DB_1960	Helianthus argophyllus		PI 695766	1960	IND	United States	Texas	27.9327	-97.123	0
ARG_13	DB_1961	Helianthus argophyllus			1961	IND	United States	Texas	27.8327	-97.0494	6
ARG_14	DB_1962	Helianthus argophyllus		PI 695768	1962	IND	United States	Texas	27.8469	-97.0487	7
ARG_15	DB_1963	Helianthus argophyllus		PI 695769	1963	IND	United States	Texas	27.8348	-97.0883	0
ARG_16	DB_1964	Helianthus argophyllus		PI 695770	1964	IND	United States	Texas	27.686	-97.1767	0
ARG_17	DB_1965	Helianthus argophyllus		PI 695771	1965	IND	United States	Texas	27.6182	-97.2118	3
ARG_18	DB_1966	Helianthus argophyllus		PI 695772	1966	IND	United States	Texas	27.4782	-97.2809	3
ARG_19	DB_1967	Helianthus argophyllus		PI 695773	1967	IND	United States	Texas	27.5794	-97.2215	0
ARG_20	DB_1969	Helianthus argophyllus			1969	IND	United States	Texas	27.6611	-97.3114	4
ARG_21	DB_1970	Helianthus argophyllus		PI 695776	1970	IND	United States	Texas	28.1215	-97.3924	8
ARG_22	DB_1972	Helianthus argophyllus		PI 695777	1972	IND	United States	Texas	28.2785	-97.2976	13
ARG_23	DB_1974	Helianthus argophyllus		PI 695779	1974	IND	United States	Texas	26.8902	-98.137	35
ARG_24	DB_1977	Helianthus argophyllus		PI 695781	1977	IND	United States	Texas	26.924	-97.7922	11
ARG_25	DB_1978	Helianthus argophyllus			1978	IND	United States	Texas	27.1596	-97.7941	5
ARG_26	DB_1980	Helianthus argophyllus		PI 695783	1980	IND	United States	Texas	27.2734	-97.8031	0
ARG_27	DB_1982	Helianthus argophyllus		PI 695785	1982	IND	United States	Texas	27.1425	-98.15	35
ARG_28	DB_1984	Helianthus argophyllus		PI 695786	1984	IND	United States	Texas	27.0022	-98.1358	40
ARG_29	DB_1986	Helianthus argophyllus			1986	IND	United States	Texas	27.1001	-98.147	35
ARG_30	DB_1988	Helianthus argophyllus			1988	IND	United States	Texas	27.2574	-97.9459	30
CAR-2530		Helianthus carnosus		PI 649956			United States	Florida				1
DEB_1135		Helianthus debilis	silvestris	PI 468679			United States	Texas
DEB_1136		Helianthus debilis	silvestris	PI 468680			United States	Texas
DEB_1289		Helianthus debilis	silvestris	PI 468686			United States	Texas				0.164855
DEB_1810		Helianthus debilis
DEB_1837		Helianthus debilis	silvestris	PI 494584			United States	Texas
DEB_366		Helianthus debilis	silvestris	PI 435651			United States	Texas
DEB_391		Helianthus debilis	cucumerifolius	PI 435654			United States	Texas
DEB_896		Helianthus debilis	cucumerifolius	PI 435673			United States	Georgia
DEC_1895		Helianthus decapetalus		PI 503243			United States	Virginia
DIV-1873		Helianthus divaricatus		PI 503209			United States	Virginia				0.182964
DIV_1956		Helianthus divaricatus		PI 503218			United States	Pennsylvania
EXI-2365		Helianthus exilis		PI 649895			United States	California				0.467285
FLO-1579		Helianthus floridanus		PI 468716			United States	Georgia				0.740783
GIG-LC8		Helianthus giganteus		PI 664647			United States	Ohio				0.0941746
GRO-11		Helianthus grosseserratus		PI 613793			United States	Iowa				1
GRO_2043		Helianthus grosseserratus		PI 547195			United States	Michigan
MAX-2325		Helianthus maximiliani		PI 592333			United States	Manitoba				0.575208
MOL-DP7		Helianthus mollis		PI 673147			United States	Ohio				1
MOL-JDC		Helianthus mollis		PI 664805			United States	Kasas				1
NUT-1971		Helianthus nuttallii ssp. nuttallii		PI 531045			United States	Oregon				0.273817
NUT-2290		Helianthus nuttallii ssp. rydbergii		PI 592346			Canada	Saskatchwan				0.438217
POR-2419		Helianthus porteri		PI 649914			United States	Georgia				0.557412
POR-2423		Helianthus porteri		PI 649918			United States	Georgia				0.389356
PRA-1142		Helianthus praecox	praecox	PI 468851			United States	Texas				0.113163
PRA-1168		Helianthus praecox	hirtus	PI 468847			United States	Texas				0.0938325
PRA-1333		Helianthus praecox	runyonii	PI 468865			United States	Texas				0.19306
SIL-2689		Helianthus silphioides		PI 664793			United States	Missouri				0.29118
BSP		Phoebanthus tenuifolius					United States	Florida				0.162902

## Sheet: Climatic variables legends
Abbreviation	Climatic variable
MAT	mean annual temperature (°C)
MWMT	mean warmest month temperature (°C)
MCMT	mean coldest month temperature (°C)
TD	temperature difference between MWMT and MCMT, or continentality (°C)
Tave_sm	summer mean temperature (°C)
MAP	mean annual precipitation (mm)
MSP	May to September precipitation (mm)
PPT_sm	summer precipitation (mm)
AHM	annual heat-moisture index (MAT+10)/(MAP/1000))
SHM	summer heat-moisture index ((MWMT)/(MSP/1000))
MAR	mean annual solar radiation (MJ m‐2 d‐1)
Rad_sm	mean summer solar radiation (MJ m‐2 d‐1)
Eref	Hargreaves reference evaporation (mm)
Eref_sm	summer Hargreaves reference evaporation (mm)
CMD	Hargreaves climatic moisture deficit (mm)
CMD_sm	summer Hargreaves climatic moisture deficit (mm)
RH	mean annual relative humidity (%)
RH_sm	summer relative humidity (%)
UV_annual_mean	annual mean UV‐B (J m−2 d−1)
UV_highest_month	mean UV‐B of highest month (J m−2 d−1)
UV_sm	sum of monthly mean UV‐B during summer (J m−2 d−1)

## Sheet: LUVp ~ RH_sm Tave_sm
Linear model for the correlation between LUVp, and RH_sm and Tave_sm
H. annuus
Model: LUVp ~ RHsm x Tavesm	F(3,106) = 63.42; Adj. R2 = 0.632; P < 2 × 10-16
Effect	Estimate	Std. er.	t	P
Intercept	-0.177	0.626	-0.283	0.7777
Relative Humidity, summer	0.025	0.012	2.083	0.03967
Average Temperature, summer	0.059	0.025	2.379	0.01914
RHsm x Tavesm	-0.001	0.0005	-3.229	0.00165
H. petiolaris
Model: LUVp ~ RHsm x Tavesm	F(3,37) = 30.02; Adj. R2 = 0.685; P = 5.2 × 10-10
Effect	Estimate	Std. er.	t	P
Intercept	0.099	0.686	0.144	0.886
Relative Humidity, summer	0.014	0.014	0.983	0.332
Average Temperature, summer	0.002	0.03	0.08	0.937
RHsm x Tavesm	-0.0005	0.0006	-0.843	0.404
