# Supplementary material for: Genetic basis and dual adaptive role of floral pigmentation in sunflowers
Source: eLife. 2022 Jan 18;11:e72072. doi: 10.7554/eLife.72072 (PMC8765750; doi:10.7554/eLife.72072)
Supplement: Figure 1—source data 2. [file elife-72072-fig1-data2.xlsx]

## Sheet: LUVp values and genotypes
Figure 1 - source data 2: Individuals used in this study, LUVp values, Chr15_LUVp SNP genotypes and inflorescence traits.
Individual	Species	Subsp	Population_name	Population_AKA	Experiment	Genotype_at_Chr15_LUVp_SNP	LUVp	LUVp (excluding partially UV-absorbing ligule tips)	Disk_diameter (cm)	Ligule_length (cm)	Ligule_width (cm)	Flower_head_diameter (cm)	Ligule_Lenght/width_ratio	Relative_ligule_size	Ligules_number
ANN0801	Helianthus annuus	annuus	ANN_01	DB_1794	2016 common garden	S/S	0.643514	0.524686	4.44121	4.96522	1.7308	14.2801	2.90617	3.21782	20.3333
ANN0802	Helianthus annuus	annuus	ANN_01	DB_1794	2016 common garden	L/S	0.828329	0.828329	3.84467	3.89086	2.00332	11.2828	1.97502	2.94247	18
ANN0803	Helianthus annuus	annuus	ANN_01	DB_1794	2016 common garden	L/L	1	1	4.78231	4.60505	1.77939	13.7018	2.61154	2.86572	21
ANN0804	Helianthus annuus	annuus	ANN_01	DB_1794	2016 common garden	L/L	1	1	4.88321	3.68975	1.66573	12.013	2.26716	2.45833	22.6667
ANN0805	Helianthus annuus	annuus	ANN_01	DB_1794	2016 common garden	S/S	0.718346	0.624462	5.00186	4.80486	2.10697	14.423	2.31922	2.89461	23.3333
ANN0806	Helianthus annuus	annuus	ANN_01	DB_1794	2016 common garden	S/S	0.517497	0.517497	4.62622	4.66152	2.07871	13.9527	2.24536	3.01925	22.6667
ANN0807	Helianthus annuus	annuus	ANN_01	DB_1794	2016 common garden	L/S	0.585662	0.585662	NA	NA	NA	NA	NA	NA	26
ANN0808	Helianthus annuus	annuus	ANN_01	DB_1794	2016 common garden	S/S	0.709928	0.613237	4.7334	6.58911	1.22453	17.7888	5.58279	3.75958	22.6667
ANN0809	Helianthus annuus	annuus	ANN_01	DB_1794	2016 common garden	L/L	0.734923	0.646564	3.89742	4.71942	1.45882	13.1461	3.25944	3.37425	22.75
ANN0810	Helianthus annuus	annuus	ANN_01	DB_1794	2016 common garden	S/S	0.603841	0.603841	4.01052	4.26696	1.62531	12.4202	2.67797	3.09694	22.5
ANN0811	Helianthus annuus	annuus	ANN_02	DB_1796	2016 common garden	L/S	0.54508	0.54508	4.71221	5.62414	1.77895	15.0621	3.13807	3.18534	21.6667
ANN0812	Helianthus annuus	annuus	ANN_02	DB_1796	2016 common garden	L/L	0.721349	0.628465	4.64057	5.45186	1.69165	14.6052	3.23398	3.14563	22
ANN0813	Helianthus annuus	annuus	ANN_02	DB_1796	2016 common garden	L/S	0.813265	0.75102	4.63136	5.50976	1.49857	14.9273	3.67321	3.24387	24.6667
ANN0814	Helianthus annuus	annuus	ANN_02	DB_1796	2016 common garden	L/L	1	1	2.97574	4.02323	1.78143	10.7682	2.28569	3.6194	21.3333
ANN0815	Helianthus annuus	annuus	ANN_02	DB_1796	2016 common garden	L/L	0.832178	0.776238	3.63145	5.7724	1.42803	15.2232	4.05926	4.19216	22.3333
ANN0816	Helianthus annuus	annuus	ANN_02	DB_1796	2016 common garden	L/S	0.777141	0.702855	3.73542	4.37636	1.60588	12.1237	2.79502	3.256	22.3333
ANN0817	Helianthus annuus	annuus	ANN_02	DB_1796	2016 common garden	L/L	0.772709	0.696946	5.05975	5.94663	1.78352	16.338	3.37952	3.2539	21.3333
ANN0818	Helianthus annuus	annuus	ANN_02	DB_1796	2016 common garden	L/S	0.873263	0.746526	3.82608	4.12503	1.74234	11.89	2.38394	3.10744	19
ANN0819	Helianthus annuus	annuus	ANN_02	DB_1796	2016 common garden	L/L	0.656319	0.541759	4.25034	3.77895	2.03097	11.0637	1.87053	2.60998	21.3333
ANN0820	Helianthus annuus	annuus	ANN_02	DB_1796	2016 common garden	L/L	0.719041	0.625388	4.29458	5.33913	1.77555	14.7229	2.98424	3.43283	22.3333
ANN0821	Helianthus annuus	annuus	ANN_03	DB_1797	2016 common garden	L/L	1	1	4.54102	4.21745	1.9826	12.7201	2.13788	2.81327	22.3333
ANN0822	Helianthus annuus	annuus	ANN_03	DB_1797	2016 common garden	L/S	NA	NA	NA	NA	NA	NA	NA	NA	24
ANN0823	Helianthus annuus	annuus	ANN_03	DB_1797	2016 common garden	L/L	0.901481	0.802961	4.59034	5.27638	2.16303	14.7552	2.46203	3.22411	23.6667
ANN0824	Helianthus annuus	annuus	ANN_03	DB_1797	2016 common garden	L/L	1	1	4.30218	4.85708	2.05079	13.6868	2.38066	3.19087	21.6667
ANN0825	Helianthus annuus	annuus	ANN_03	DB_1797	2016 common garden	L/L	1	1	5.23154	5.4832	1.79235	16.0676	3.07443	3.09519	28.4
ANN0826	Helianthus annuus	annuus	ANN_03	DB_1797	2016 common garden	L/L	1	1	3.98617	5.21454	1.75418	13.9885	2.97471	3.51328	20.6667
ANN0827	Helianthus annuus	annuus	ANN_03	DB_1797	2016 common garden	L/L	1	1	3.89192	3.67465	1.75218	11.0649	2.10759	2.86099	20.6667
ANN0828	Helianthus annuus	annuus	ANN_03	DB_1797	2016 common garden	L/L	0.896105	0.792209	4.9007	4.34009	1.06224	12.7375	4.14404	2.60074	29
ANN0829	Helianthus annuus	annuus	ANN_03	DB_1797	2016 common garden	L/L	1	1	4.23785	4.41556	1.8864	12.5391	2.36298	2.96856	20.3333
ANN0830	Helianthus annuus	annuus	ANN_03	DB_1797	2016 common garden	L/L	NA	NA
ANN0831	Helianthus annuus	annuus	ANN_04	DB_1798	2016 common garden	L/L	NA	NA
ANN0832	Helianthus annuus	annuus	ANN_04	DB_1798	2016 common garden	L/L	0.918191	0.836381	3.03799	4.4884	1.64712	11.8197	2.7304	3.90981	15.6667
ANN0833	Helianthus annuus	annuus	ANN_04	DB_1798	2016 common garden	L/L	NA	NA	3.53571	5.28022	1.90633	13.2648	2.77904	3.77671	19
ANN0834	Helianthus annuus	annuus	ANN_04	DB_1798	2016 common garden	L/L	0.759715	0.759715	2.67416	4.44177	1.61782	11.3691	2.75021	4.26406	18.3333
ANN0835	Helianthus annuus	annuus	ANN_04	DB_1798	2016 common garden	L/S	0.653769	0.653769	3.94004	4.15207	1.27872	12.0433	3.25292	3.08912	20.3333
ANN0836	Helianthus annuus	annuus	ANN_04	DB_1798	2016 common garden	L/L	0.833103	0.666207	3.06854	4.58004	1.9395	11.9088	2.38623	3.89846	16
ANN0837	Helianthus annuus	annuus	ANN_04	DB_1798	2016 common garden	L/L	0.62274	0.62274	3.22391	6.07759	1.98658	14.8146	3.07004	4.60839	19.75
ANN0838	Helianthus annuus	annuus	ANN_04	DB_1798	2016 common garden	L/L	0.739768	0.653024	2.83984	5.86264	2.02583	13.6681	2.91827	4.8121	15
ANN0839	Helianthus annuus	annuus	ANN_04	DB_1798	2016 common garden	L/L	0.797611	0.730149	3.38045	6.52398	2.14571	15.568	3.01487	4.70571	18.5714
ANN0840	Helianthus annuus	annuus	ANN_04	DB_1798	2016 common garden	L/L	0.674786	0.674786	3.97162	5.26103	2.07856	13.901	2.57853	3.50555	20.5
ANN0841	Helianthus annuus	annuus	ANN_05	DB_1799	2016 common garden	S/S	0.502367	0.502367	4.50306	6.44356	2.18089	17.2018	2.96015	3.82189	20.6667
ANN0842	Helianthus annuus	annuus	ANN_05	DB_1799	2016 common garden	S/S	0.56329	0.56329	5.2961	5.37974	2.56246	15.5135	2.11612	2.92948	19.6667
ANN0843	Helianthus annuus	annuus	ANN_05	DB_1799	2016 common garden	S/S	0.516158	0.516158	3.7772	5.69564	1.90868	14.7207	3.02408	3.90092	22.3333
ANN0844	Helianthus annuus	annuus	ANN_05	DB_1799	2016 common garden	S/S	0.645156	0.526874	3.87002	5.05118	1.57582	13.5663	3.21816	3.51235	20
ANN0845	Helianthus annuus	annuus	ANN_05	DB_1799	2016 common garden	L/L	0.666466	0.555288	3.88224	5.41741	2.10751	14.4321	2.57059	3.73138	17.3333
ANN0846	Helianthus annuus	annuus	ANN_05	DB_1799	2016 common garden	L/S	0.917756	0.835513	4.11908	5.42128	1.71499	14.3766	3.17062	3.48755	21
ANN0847	Helianthus annuus	annuus	ANN_05	DB_1799	2016 common garden	L/L	0.915255	0.83051	3.5123	4.54693	1.86901	12.0411	2.4364	3.45531	25
ANN0848	Helianthus annuus	annuus	ANN_05	DB_1799	2016 common garden	L/S	0.746194	0.661592	4.54656	3.86138	1.52385	11.8036	2.55378	2.59569	22
ANN0849	Helianthus annuus	annuus	ANN_05	DB_1799	2016 common garden	L/S	0.653699	0.538265	3.68182	4.7796	1.76981	12.8849	2.71455	3.51493	20.6667
ANN0850	Helianthus annuus	annuus	ANN_05	DB_1799	2016 common garden	L/L	0.608887	0.478516	4.21931	5.11677	1.93233	14.3875	2.66728	3.41525	21
ANN0851	Helianthus annuus	annuus	ANN_06	DB_1800	2016 common garden	S/S	0.581608	0.442145	4.88166	6.37243	1.88741	17.4057	3.38223	3.5689	24.6667
ANN0852	Helianthus annuus	annuus	ANN_06	DB_1800	2016 common garden	L/L	0.870777	0.741554	3.61666	6.93496	1.88023	16.1693	3.6873	4.4734	16
ANN0853	Helianthus annuus	annuus	ANN_06	DB_1800	2016 common garden	L/S	0.679248	0.57233	4.44882	5.94308	1.82159	15.4974	3.26907	3.50186	21
ANN0854	Helianthus annuus	annuus	ANN_06	DB_1800	2016 common garden	L/L	0.605798	0.474398	4.12951	6.66269	1.7436	17.1966	3.83785	4.17669	21.3333
ANN0855	Helianthus annuus	annuus	ANN_06	DB_1800	2016 common garden	L/L	0.631423	0.508564	4.67408	5.82103	2.00559	15.992	2.91036	3.4258	21.3333
ANN0856	Helianthus annuus	annuus	ANN_06	DB_1800	2016 common garden	S/S	0.619812	0.493083	4.25358	5.06213	1.35021	14.4095	3.75915	3.38817	26
ANN0857	Helianthus annuus	annuus	ANN_06	DB_1800	2016 common garden	L/S	0.659539	0.546052	4.54936	6.30417	1.85357	16.5191	3.41372	3.63318	22
ANN0858	Helianthus annuus	annuus	ANN_06	DB_1800	2016 common garden	L/S	0.660858	0.54781	3.9602	6.41172	2.11653	16.5712	3.03961	4.19269	15
ANN0859	Helianthus annuus	annuus	ANN_06	DB_1800	2016 common garden	S/S	0.491797	0.491797	3.99633	5.98484	1.68856	15.449	3.58493	3.86621	19
ANN0860	Helianthus annuus	annuus	ANN_06	DB_1800	2016 common garden	L/L	1	1	3.76035	6.51768	2.01703	16.6194	3.24284	4.44183	20.6667
ANN0861	Helianthus annuus	annuus	ANN_07	DB_1802	2016 common garden	L/L	0.823559	0.647119	4.03186	5.13695	1.70037	13.8789	3.03545	3.45328	18.75
ANN0862	Helianthus annuus	annuus	ANN_07	DB_1802	2016 common garden	L/S	NA	NA	3.41961	4.64569	1.63617	12.6206	2.88985	3.72278	17.75
ANN0863	Helianthus annuus	annuus	ANN_07	DB_1802	2016 common garden	L/L	0.874862	0.749724	4.62798	6.11668	1.67874	16.2304	3.67097	3.51003	21
ANN0864	Helianthus annuus	annuus	ANN_07	DB_1802	2016 common garden	L/L	0.550176	0.550176	3.02796	4.90649	1.56773	13.0799	3.16297	4.32361	16
ANN0865	Helianthus annuus	annuus	ANN_07	DB_1802	2016 common garden	L/L	0.806186	0.612371	2.84495	4.16369	1.68218	11.0121	2.50361	3.91331	17
ANN0866	Helianthus annuus	annuus	ANN_07	DB_1802	2016 common garden	L/L	1	1	3.07117	4.17072	1.44228	11.0501	2.90452	3.61533	18
ANN0867	Helianthus annuus	annuus	ANN_07	DB_1802	2016 common garden	L/L	1	1	3.1636	5.63179	1.31161	12.9371	4.33626	4.07926	15
ANN0868	Helianthus annuus	annuus	ANN_07	DB_1802	2016 common garden	L/S	0.87224	0.744479	3.93856	5.57295	1.35871	14.5595	4.07388	3.69506	20
ANN0869	Helianthus annuus	annuus	ANN_07	DB_1802	2016 common garden	L/L	1	1	4.18814	5.06562	1.64611	13.8639	3.18952	3.31203	20.3333
ANN0870	Helianthus annuus	annuus	ANN_07	DB_1802	2016 common garden	L/L	0.782387	0.709849	3.39099	4.27539	1.76021	11.7665	2.43634	3.48727	15
ANN0871	Helianthus annuus	annuus	ANN_08	DB_1803	2016 common garden	L/L	0.856655	0.808873	3.97234	5.28197	1.76896	13.964	2.99842	3.51485	17.6667
ANN0872	Helianthus annuus	annuus	ANN_08	DB_1803	2016 common garden	S/S	0.560867	0.560867	2.68097	4.49706	1.29806	11.1461	3.54291	4.19513	13
ANN0873	Helianthus annuus	annuus	ANN_08	DB_1803	2016 common garden	L/L	1	1	3.10548	4.5496	1.42446	12.4148	3.19811	3.64204	20
ANN0874	Helianthus annuus	annuus	ANN_08	DB_1803	2016 common garden	L/L	0.761098	0.761098	3.24686	5.00448	1.60627	13.0058	3.14768	4.00856	19.3333
ANN0875	Helianthus annuus	annuus	ANN_08	DB_1803	2016 common garden	L/L	0.796791	0.593582	3.47898	3.87529	1.52421	11.2635	2.54621	3.28527	18.6667
ANN0876	Helianthus annuus	annuus	ANN_08	DB_1803	2016 common garden	L/S	0.518414	0.518414	2.68356	4.39455	1.47378	10.7416	2.99341	4.01815	12.5
ANN0877	Helianthus annuus	annuus	ANN_08	DB_1803	2016 common garden	L/L	0.555747	0.555747	3.46842	5.43997	1.65525	13.7476	3.30183	3.96661	14
ANN0878	Helianthus annuus	annuus	ANN_08	DB_1803	2016 common garden	L/L	1	1	3.59652	4.3703	1.57235	12.1185	2.78145	3.40983	20.25
ANN0879	Helianthus annuus	annuus	ANN_08	DB_1803	2016 common garden	L/L	0.710897	0.614529	2.97085	6.55451	1.90149	15.1239	3.46418	4.84698	18.6667
ANN0880	Helianthus annuus	annuus	ANN_08	DB_1803	2016 common garden	L/L	1	1	3.3119	4.03687	1.61958	11.2048	2.44324	3.41973	15.3333
ANN0881	Helianthus annuus	annuus	ANN_09	DB_1804	2016 common garden	L/L	0.825604	0.651209	3.84404	NA	1.25251	10.9516	2.95495	2.82118	23.3333
ANN0882	Helianthus annuus	annuus	ANN_09	DB_1804	2016 common garden	L/L	0.831223	0.662446	3.68908	3.60234	1.48312	10.2536	2.40534	2.77988	27.3333
ANN0883	Helianthus annuus	annuus	ANN_09	DB_1804	2016 common garden	L/L	0.772768	0.545536	3.57358	3.87294	1.40411	10.8473	2.78389	3.03751	18.3333
ANN0884	Helianthus annuus	annuus	ANN_09	DB_1804	2016 common garden	L/L	0.710935	0.614581	3.88763	4.02695	1.54564	11.5293	2.61908	2.96654	21.3333
ANN0885	Helianthus annuus	annuus	ANN_09	DB_1804	2016 common garden	L/L	0.758186	0.677581	3.97977	4.89761	1.25129	13.3978	3.92427	3.36585	21
ANN0886	Helianthus annuus	annuus	ANN_09	DB_1804	2016 common garden	L/L	0.905803	0.811606	3.57168	4.38478	1.43105	11.9487	3.07954	3.34435	20.3333
ANN0887	Helianthus annuus	annuus	ANN_09	DB_1804	2016 common garden	L/S	0.831779	0.663559	4.29074	3.38723	1.19406	10.8407	2.83776	2.52595	26.3333
ANN0888	Helianthus annuus	annuus	ANN_09	DB_1804	2016 common garden	L/L	0.674869	0.566492	3.75017	5.10124	1.38724	13.9263	3.68406	3.71212	22.6667
ANN0889	Helianthus annuus	annuus	ANN_09	DB_1804	2016 common garden	L/S	0.805701	0.611402	3.66046	4.49447	1.55988	12.2036	2.9017	3.36819	21
ANN0890	Helianthus annuus	annuus	ANN_09	DB_1804	2016 common garden	L/L	0.779454	0.558908	4.23169	4.11281	1.83755	11.8755	2.26218	2.809	23.6667
ANN0891	Helianthus annuus	annuus	ANN_10	DB_1805	2016 common garden	L/L	0.834597	0.669195	3.73804	4.63304	1.48518	12.5719	3.12899	3.35372	24
ANN0892	Helianthus annuus	annuus	ANN_10	DB_1805	2016 common garden	L/L	0.896637	0.793275	4.01519	4.45237	1.22635	12.6255	3.64479	3.14995	29.3333
ANN0893	Helianthus annuus	annuus	ANN_10	DB_1805	2016 common garden	L/L	1	1	3.70097	4.37491	1.45611	12.2173	3.01745	3.30612	21
ANN0894	Helianthus annuus	annuus	ANN_10	DB_1805	2016 common garden	L/L	0.793331	0.586662	3.25453	3.92548	1.44847	11.1696	2.7338	3.45484	23
ANN0895	Helianthus annuus	annuus	ANN_10	DB_1805	2016 common garden	L/L	1	1	2.31415	2.21723	0.901474	6.66795	2.465	2.87608	20.6667
ANN0896	Helianthus annuus	annuus	ANN_10	DB_1805	2016 common garden	L/L	1	1	3.90333	4.44669	1.29441	12.87	3.44439	3.29729	23
ANN0897	Helianthus annuus	annuus	ANN_10	DB_1805	2016 common garden	L/L	0.822898	0.645795	3.79591	3.90205	1.6685	11.7601	2.34366	3.09836	25
ANN0898	Helianthus annuus	annuus	ANN_10	DB_1805	2016 common garden	L/L	1	1	3.52031	4.40988	1.31333	12.0694	3.35853	3.43053	20.6667
ANN0899	Helianthus annuus	annuus	ANN_10	DB_1805	2016 common garden	L/L	1	1	3.85916	3.95267	1.44603	11.5865	2.72586	3.02795	18.6667
ANN0900	Helianthus annuus	annuus	ANN_10	DB_1805	2016 common garden	L/L	0.796275	0.728367	3.73595	3.74374	1.25424	10.8178	3.00503	2.89559	30
ANN0901	Helianthus annuus	annuus	ANN_11	DB_1806	2016 common garden	L/L	1	1	6.77475	8.08096	2.10546	22.2473	3.82421	3.30255	31
ANN0902	Helianthus annuus	annuus	ANN_11	DB_1806	2016 common garden	L/L	0.773049	0.697399	5.0687	5.36358	1.58008	15.4496	3.4192	3.04517	30.6667
ANN0903	Helianthus annuus	annuus	ANN_11	DB_1806	2016 common garden	L/L	1	1	5.81991	6.18939	1.6999	17.9073	3.60608	3.07683	29
ANN0904	Helianthus annuus	annuus	ANN_11	DB_1806	2016 common garden	L/L	1	1	6.44264	7.55483	2.01255	21.1397	3.74759	3.28017	32
ANN0905	Helianthus annuus	annuus	ANN_11	DB_1806	2016 common garden	L/L	0.687964	0.687964	5.89712	5.01086	1.65829	15.299	3.04179	2.61847	33
ANN0906	Helianthus annuus	annuus	ANN_11	DB_1806	2016 common garden	L/L	1	1	6.13101	6.14229	2.03627	18.0052	3.23392	2.93731	30
ANN0907	Helianthus annuus	annuus	ANN_11	DB_1806	2016 common garden	L/L	0.618857	0.618857	6.35001	5.65136	1.85953	17.0988	2.64958	2.69329	27.5
ANN0908	Helianthus annuus	annuus	ANN_11	DB_1806	2016 common garden	L/L	0.791948	0.791948	5.19302	6.82956	1.90107	17.9925	3.6222	3.46886	25.3333
ANN0909	Helianthus annuus	annuus	ANN_11	DB_1806	2016 common garden	L/L	0.784065	0.784065	6.57639	6.5654	2.34663	18.7573	2.79891	2.85347	28.3333
ANN0910	Helianthus annuus	annuus	ANN_11	DB_1806	2016 common garden	L/L	1	1	5.67819	5.85795	2.23791	17.1328	2.65085	3.01912	27
ANN0911	Helianthus annuus	annuus	ANN_12	DB_1807	2016 common garden	L/L	0.845269	0.690538	4.87978	4.82267	2.19981	13.9645	2.18213	2.88196	24.6667
ANN0912	Helianthus annuus	annuus	ANN_12	DB_1807	2016 common garden	L/L	0.798845	0.731793	5.72313	5.25622	1.87841	15.5141	2.81239	2.7223	30.3333
ANN0913	Helianthus annuus	annuus	ANN_12	DB_1807	2016 common garden	L/L	0.782834	0.710446	5.58301	6.3071	1.70876	17.4381	3.72862	3.12374	31.3333
ANN0914	Helianthus annuus	annuus	ANN_12	DB_1807	2016 common garden	L/L	0.812955	0.750606	4.92222	5.84317	1.59948	16.4421	3.66342	3.35959	25.6667
ANN0915	Helianthus annuus	annuus	ANN_12	DB_1807	2016 common garden	L/L	0.79942	0.73256	4.42096	4.93457	1.83246	13.7229	2.70606	3.13721	26
ANN0916	Helianthus annuus	annuus	ANN_12	DB_1807	2016 common garden	L/L	NA	NA	5.26727	6.30151	1.88507	18.2163	3.99114	3.45839	24
ANN0917	Helianthus annuus	annuus	ANN_12	DB_1807	2016 common garden	L/L	0.726606	0.635475	3.7237	3.09606	1.18428	9.98427	2.66473	2.68128	36
ANN0918	Helianthus annuus	annuus	ANN_12	DB_1807	2016 common garden	L/S	0.654889	0.539853	4.68836	5.96533	1.93586	16.4824	3.1045	3.53983	23.3333
ANN0919	Helianthus annuus	annuus	ANN_12	DB_1807	2016 common garden	L/L	1	1	4.2061	4.80006	1.25709	13.6615	3.75583	3.26815	24.6667
ANN0920	Helianthus annuus	annuus	ANN_12	DB_1807	2016 common garden	L/S	0.731595	0.642127	5.51727	6.59671	2.38632	NA	2.80501	3.17549	21.3333
ANN0921	Helianthus annuus	annuus	ANN_13	DB_1811	2016 common garden	S/S	0.560847	0.560847	4.8558	5.02438	1.5766	14.3681	3.19931	2.95912	20.3333
ANN0922	Helianthus annuus	annuus	ANN_13	DB_1811	2016 common garden	S/S	0.497334	0.497334	4.0105	3.75639	1.32465	11.3401	2.84704	2.8241	21.25
ANN0923	Helianthus annuus	annuus	ANN_13	DB_1811	2016 common garden	S/S	0.57955	0.57955	4.51314	4.57047	1.78083	13.2972	2.57718	2.94629	21
ANN0924	Helianthus annuus	annuus	ANN_13	DB_1811	2016 common garden	S/S	0.541104	0.541104	4.46555	4.41344	1.75804	12.6432	2.51818	2.8318	18.6667
ANN0925	Helianthus annuus	annuus	ANN_13	DB_1811	2016 common garden	S/S	0.499525	0.499525	3.79007	4.20464	1.70898	11.6295	2.50019	3.06832	21.6667
ANN0926	Helianthus annuus	annuus	ANN_13	DB_1811	2016 common garden	L/S	0.515088	0.515088
ANN0927	Helianthus annuus	annuus	ANN_13	DB_1811	2016 common garden	S/S	0.53394	0.53394	4.3198	5.05086	1.70124	13.947	2.98453	3.24428	21
ANN0928	Helianthus annuus	annuus	ANN_13	DB_1811	2016 common garden	S/S	0.532265	0.532265	4.47275	4.26957	1.3722	12.8354	3.12157	2.87167	25.6667
ANN0929	Helianthus annuus	annuus	ANN_13	DB_1811	2016 common garden	S/S	0.664213	0.664213	3.18995	3.48637	1.21804	10.0239	2.89503	3.14623	21
ANN0930	Helianthus annuus	annuus	ANN_13	DB_1811	2016 common garden	S/S	0.421069	0.421069	3.6488	4.44415	1.37794	12.0937	3.12045	3.253	21
ANN0931	Helianthus annuus	annuus	ANN_14	DB_1813	2016 common garden	L/L	0.659572	0.659572	3.3647	4.71983	2.13133	12.6008	2.22016	3.74427	21.5
ANN0932	Helianthus annuus	annuus	ANN_14	DB_1813	2016 common garden	L/L	1	1	4.4411	5.4242	1.60764	14.967	3.39014	3.37114	28.5
ANN0933	Helianthus annuus	annuus	ANN_14	DB_1813	2016 common garden	L/S	0.675379	0.567172	4.10366	5.19912	1.68799	14.6425	3.13338	3.57956	22
ANN0934	Helianthus annuus	annuus	ANN_14	DB_1813	2016 common garden	L/L	1	1	4.96836	5.70576	1.84504	16.0872	3.09868	3.23596	32.6667
ANN0935	Helianthus annuus	annuus	ANN_14	DB_1813	2016 common garden	L/L	0.80563	0.61126	4.47826	6.15277	2.01035	17.2229	3.07455	3.68613	18.5
ANN0936	Helianthus annuus	annuus	ANN_14	DB_1813	2016 common garden	L/L	NA	NA	3.58449	5.53951	1.8491	14.2058	2.98048	3.96236	20.3333
ANN0937	Helianthus annuus	annuus	ANN_14	DB_1813	2016 common garden	L/S	0.845719	0.691439	4.25188	5.00169	1.69448	14.124	2.94219	3.32613	28.6667
ANN0938	Helianthus annuus	annuus	ANN_14	DB_1813	2016 common garden	L/L	NA	NA	NA	NA	NA	NA	NA	NA	33.5
ANN0939	Helianthus annuus	annuus	ANN_14	DB_1813	2016 common garden	L/L	0.886056	0.772112	4.80248	5.06319	1.58776	14.5781	3.21505	3.04765	33.3333
ANN0940	Helianthus annuus	annuus	ANN_14	DB_1813	2016 common garden	L/L	0.711617	0.711617	4.89235	5.9235	2.0881	16.5014	2.83902	3.37622	24
ANN0941	Helianthus annuus	annuus	ANN_15	DB_1815	2016 common garden	L/L	1	1	4.77738	4.05698	2.01072	12.8366	2.01962	2.68307	20.3333
ANN0942	Helianthus annuus	annuus	ANN_15	DB_1815	2016 common garden	L/L	0.706494	0.608659
ANN0943	Helianthus annuus	annuus	ANN_15	DB_1815	2016 common garden	L/L	1	1	4.98529	6.10245	2.12526	16.4968	2.93752	3.30509	23
ANN0944	Helianthus annuus	annuus	ANN_15	DB_1815	2016 common garden	L/L	0.740824	0.654432	5.65386	4.8529	1.7577	14.6843	2.76646	2.59235	30.25
ANN0945	Helianthus annuus	annuus	ANN_15	DB_1815	2016 common garden	L/L	0.777325	0.7031	5.57628	5.32682	2.07913	15.6697	2.57633	2.81152	27.3333
ANN0946	Helianthus annuus	annuus	ANN_15	DB_1815	2016 common garden	L/L	0.909014	0.818029	5.31815	4.5615	1.64855	14.3172	2.78214	2.70377	32.6667
ANN0947	Helianthus annuus	annuus	ANN_15	DB_1815	2016 common garden	L/L	0.693236	0.693236	5.18876	4.6997	1.7555	14.1685	2.7465	2.73685	30
ANN0948	Helianthus annuus	annuus	ANN_15	DB_1815	2016 common garden	L/L	1	1	5.10486	6.62168	2.266	17.7148	2.96491	3.46802	19
ANN0949	Helianthus annuus	annuus	ANN_15	DB_1815	2016 common garden	L/L	0.691217	0.588289	4.71935	6.0113	2.1923	16.3744	2.75639	3.4744	24.6667
ANN0950	Helianthus annuus	annuus	ANN_15	DB_1815	2016 common garden	L/L	1	1	5.42412	6.26246	2.11264	18.0585	2.96501	3.33387	24.3333
ANN0951	Helianthus annuus	annuus	ANN_16	DB_1817	2016 common garden	L/L	1	1	4.75197	6.68398	2.0969	17.5633	3.19336	3.69725	27.3333
ANN0952	Helianthus annuus	annuus	ANN_16	DB_1817	2016 common garden	L/L	1	1	4.81142	5.62816	1.65152	15.7796	3.42814	3.27784	25
ANN0953	Helianthus annuus	annuus	ANN_16	DB_1817	2016 common garden	L/L	0.715593	0.715593	5.15282	5.70393	NA	15.9657	3.43897	3.09823	29
ANN0954	Helianthus annuus	annuus	ANN_16	DB_1817	2016 common garden	L/L	0.876579	0.753159	4.08686	5.01159	1.6422	13.7674	3.06247	3.38111	22
ANN0955	Helianthus annuus	annuus	ANN_16	DB_1817	2016 common garden	L/L	1	1	3.93821	5.28785	1.5172	14.1406	3.50039	3.59758	21.3333
ANN0956	Helianthus annuus	annuus	ANN_16	DB_1817	2016 common garden	L/L	1	1	5.74264	6.51375	1.71623	17.9653	3.78333	3.24399	33
ANN0957	Helianthus annuus	annuus	ANN_16	DB_1817	2016 common garden	L/L	1	1	4.76027	5.66141	1.91566	15.7452	2.95847	3.30788	24.3333
ANN0958	Helianthus annuus	annuus	ANN_16	DB_1817	2016 common garden	L/L	0.70423	0.60564	4.8491	5.80754	1.67666	15.7901	3.46791	3.25924	25.6667
ANN0959	Helianthus annuus	annuus	ANN_16	DB_1817	2016 common garden	L/L	0.863487	0.726973	4.42523	7.03097	1.70969	18.6673	4.143	4.21835	22.3333
ANN0960	Helianthus annuus	annuus	ANN_16	DB_1817	2016 common garden	L/L	1	1	5.25997	5.50647	1.82178	15.6764	3.00937	2.98033	28
ANN0961	Helianthus annuus	annuus	ANN_17	DB_1818	2016 common garden	L/L	0.817413	0.756551	5.67781	6.20662	2.03457	16.9341	3.05114	2.99272	21.6667
ANN0962	Helianthus annuus	annuus	ANN_17	DB_1818	2016 common garden	L/L	1	1	5.77132	5.43497	2.27593	16.4123	2.39868	2.8515	23.5
ANN0963	Helianthus annuus	annuus	ANN_17	DB_1818	2016 common garden	L/L	0.716461	0.716461	6.02307	4.83675	1.56961	15.2954	3.11095	2.67	30
ANN0964	Helianthus annuus	annuus	ANN_17	DB_1818	2016 common garden	L/L	0.862365	0.724729	5.52809	5.03667	1.78503	14.9269	2.8409	2.72305	27
ANN0965	Helianthus annuus	annuus	ANN_17	DB_1818	2016 common garden	L/L	0.741782	0.655709	6.27786	5.35402	2.16023	16.0017	2.48168	2.55063	29.3333
ANN0966	Helianthus annuus	annuus	ANN_17	DB_1818	2016 common garden	L/L	NA	NA	3.26071	4.90618	1.58431	13.4841	3.10294	4.13533	21
ANN0967	Helianthus annuus	annuus	ANN_17	DB_1818	2016 common garden	L/L	0.823234	0.646467	5.33418	5.321	1.76065	15.7557	3.02514	2.95374	24.6667
ANN0968	Helianthus annuus	annuus	ANN_17	DB_1818	2016 common garden	L/L	1	1	5.64899	4.63013	1.97267	14.6841	2.34963	2.60414	26
ANN0969	Helianthus annuus	annuus	ANN_17	DB_1818	2016 common garden	L/L	0.72404	0.632053	5.13267	4.69236	1.82133	14.2938	2.61613	2.78483	27.5
ANN0970	Helianthus annuus	annuus	ANN_17	DB_1818	2016 common garden	L/L	0.739496	0.652662	5.97042	6.01377	1.82225	17.883	3.3169	3.00304	28
ANN0971	Helianthus annuus	annuus	ANN_18	DB_1820	2016 common garden	L/L	0.808254	0.744339	4.77603	5.36932	1.22232	14.8468	4.37912	3.11331	29.3333
ANN0972	Helianthus annuus	annuus	ANN_18	DB_1820	2016 common garden	L/L	1	1	5.65155	6.05621	1.27283	17.3946	4.66395	3.08249	32
ANN0973	Helianthus annuus	annuus	ANN_18	DB_1820	2016 common garden	L/L	1	1	5.92707	4.36991	1.45215	14.1485	3.00527	2.38829	34.3333
ANN0974	Helianthus annuus	annuus	ANN_18	DB_1820	2016 common garden	L/L	NA	NA
ANN0975	Helianthus annuus	annuus	ANN_18	DB_1820	2016 common garden	L/L	1	1	6.2544	4.38908	1.34567	14.6079	3.26767	2.33872	33.6667
ANN0976	Helianthus annuus	annuus	ANN_18	DB_1820	2016 common garden	L/L	1	1	4.97696	5.03623	1.32567	14.9306	3.81855	3.01138	24.6667
ANN0977	Helianthus annuus	annuus	ANN_18	DB_1820	2016 common garden	S/S	0.517034	0.517034	5.74129	3.93453	1.07695	13.3374	3.65521	2.33245	38
ANN0978	Helianthus annuus	annuus	ANN_18	DB_1820	2016 common garden	L/L	0.894653	0.789305	5.3394	4.72476	1.27591	14.8965	3.83442	2.78646	33
ANN0979	Helianthus annuus	annuus	ANN_18	DB_1820	2016 common garden	L/L	1	1	5.57607	4.89062	1.0392	15.3215	4.89383	2.74724	32.6667
ANN0980	Helianthus annuus	annuus	ANN_18	DB_1820	2016 common garden	L/L	0.808609	0.617218	4.40886	3.57467	1.06278	11.4866	3.3766	2.60545	33.3333
ANN0981	Helianthus annuus	annuus	ANN_19	DB_1822	2016 common garden	L/L	1	1	5.43042	6.54705	1.58972	18.491	4.21459	3.40511	29.6667
ANN0982	Helianthus annuus	annuus	ANN_19	DB_1822	2016 common garden	L/L	0.860213	0.720427	5.02373	4.30739	1.16128	13.477	3.78527	2.69016	25
ANN0983	Helianthus annuus	annuus	ANN_19	DB_1822	2016 common garden	L/S	1	1	5.45944	4.42076	1.2627	13.8999	3.445	2.54764	32
ANN0984	Helianthus annuus	annuus	ANN_19	DB_1822	2016 common garden	L/L	1	1	5.4185	4.86869	NA	14.7385	NA	2.72271	21.3333
ANN0985	Helianthus annuus	annuus	ANN_19	DB_1822	2016 common garden	L/L	1	1	5.29766	NA	1.2479	14.559	3.71469	2.67801	31
ANN0986	Helianthus annuus	annuus	ANN_19	DB_1822	2016 common garden	L/L	1	1	6.26757	5.03741	1.22218	15.8954	4.14032	2.54025	33.6667
ANN0987	Helianthus annuus	annuus	ANN_19	DB_1822	2016 common garden	L/L	0.80618	0.741573	5.24145	4.80374	1.60817	14.909	2.99563	2.85148	24.3333
ANN0988	Helianthus annuus	annuus	ANN_19	DB_1822	2016 common garden	L/L	1	1	5.79844	4.85969	1.4257	15.3663	3.4195	2.65346	32.75
ANN0989	Helianthus annuus	annuus	ANN_19	DB_1822	2016 common garden	L/L	1	1	5.26847	4.06921	1.38952	13.1013	2.94668	2.4882	29.3333
ANN0990	Helianthus annuus	annuus	ANN_19	DB_1822	2016 common garden	L/S	1	1	6.37675	4.83158	1.22884	14.9022	3.94448	2.33696	32
ANN0991	Helianthus annuus	annuus	ANN_20	DB_1827	2016 common garden	L/L	1	1	4.38633	5.19162	1.17379	14.3998	4.43619	3.2988	19.6667
ANN0992	Helianthus annuus	annuus	ANN_20	DB_1827	2016 common garden	L/L	1	1	4.42032	5.29766	1.46971	14.9669	3.60527	3.38863	21
ANN0993	Helianthus annuus	annuus	ANN_20	DB_1827	2016 common garden	L/L	0.723439	0.723439	5.10777	4.31476	1.46983	13.4246	2.9363	2.62768	26.3333
ANN0994	Helianthus annuus	annuus	ANN_20	DB_1827	2016 common garden	L/L	NA	NA	5.13791	NA	NA	NA	NA	NA	34
ANN0995	Helianthus annuus	annuus	ANN_20	DB_1827	2016 common garden	L/L	0.72848	0.637974	5.65538	5.45145	1.74542	16.6692	3.1403	2.95354	29.6667
ANN0996	Helianthus annuus	annuus	ANN_20	DB_1827	2016 common garden	L/L	0.560212	0.560212	4.98086	5.09245	1.67616	15.2061	3.04183	3.05244	23.5
ANN0997	Helianthus annuus	annuus	ANN_20	DB_1827	2016 common garden	L/L	1	1	5.15308	5.47501	1.42367	15.9858	3.89537	3.0553	25.3333
ANN0998	Helianthus annuus	annuus	ANN_20	DB_1827	2016 common garden	L/L	1	1	4.78816	4.35856	1.27468	12.9849	3.45215	2.71181	18.6667
ANN0999	Helianthus annuus	annuus	ANN_20	DB_1827	2016 common garden	L/L	0.895051	0.790102	5.10334	5.80773	1.31371	16.3311	4.45195	3.20574	29.6667
ANN1000	Helianthus annuus	annuus	ANN_20	DB_1827	2016 common garden	L/L	0.583865	0.583865	3.76244	4.7017	1.63042	12.5787	2.89747	3.34773	20.5
ANN1001	Helianthus annuus	annuus	ANN_21	DB_1828	2016 common garden	L/L	0.683395	0.57786	5.0895	5.25824	1.76694	15.5702	2.99352	3.05911	30
ANN1002	Helianthus annuus	annuus	ANN_21	DB_1828	2016 common garden	L/L	0.724494	0.632659	5.64465	5.7395	2.23302	16.2214	2.59837	2.8726	20.6667
ANN1003	Helianthus annuus	annuus	ANN_21	DB_1828	2016 common garden	L/L	1	1	5.08976	5.34841	NA	15.0499	2.69148	2.95841	27
ANN1004	Helianthus annuus	annuus	ANN_21	DB_1828	2016 common garden	L/L	0.595496	0.595496	4.71691	5.71736	2.37108	15.9378	2.45997	3.40474	22
ANN1005	Helianthus annuus	annuus	ANN_21	DB_1828	2016 common garden	L/L	0.491742	0.491742	3.40218	4.81167	1.5957	12.7749	3.0187	3.75458	20.3333
ANN1006	Helianthus annuus	annuus	ANN_21	DB_1828	2016 common garden	L/L	0.615481	0.615481	4.74579	4.88274	1.48809	14.5889	3.30701	3.07298	34
ANN1007	Helianthus annuus	annuus	ANN_21	DB_1828	2016 common garden	L/L	0.491728	0.491728	4.78037	5.28099	1.34656	15.2963	3.95925	3.20243	27.6667
ANN1008	Helianthus annuus	annuus	ANN_21	DB_1828	2016 common garden	L/L	0.562825	0.562825	5.49005	6.54851	1.38913	18.5816	4.41578	3.2374	24
ANN1009	Helianthus annuus	annuus	ANN_21	DB_1828	2016 common garden	L/L	0.70407	0.70407	4.44843	5.06594	1.54065	14.4102	3.30077	3.24016	31
ANN1010	Helianthus annuus	annuus	ANN_21	DB_1828	2016 common garden	L/L	0.547756	0.547756	4.42599	4.82008	1.8152	13.9729	2.65991	3.15339	23.3333
ANN1011	Helianthus annuus	annuus	ANN_22	DB_1829	2016 common garden	L/L	0.88936	0.778719	5.51076	6.08989	1.90451	17.0149	3.20339	3.09302	28.6667
ANN1012	Helianthus annuus	annuus	ANN_22	DB_1829	2016 common garden	L/L	1	1	4.87216	4.88463	1.27188	13.9202	3.96548	2.86084	25.6667
ANN1013	Helianthus annuus	annuus	ANN_22	DB_1829	2016 common garden	L/S	0.437062	0.437062	4.68597	5.36809	1.60633	14.824	3.34445	3.17302	25.6667
ANN1014	Helianthus annuus	annuus	ANN_22	DB_1829	2016 common garden	L/L	0.684167	0.57889	4.97625	5.8073	1.35167	16.2089	4.30572	3.2642	21.3333
ANN1015	Helianthus annuus	annuus	ANN_22	DB_1829	2016 common garden	L/L	0.731638	0.642185	5.49304	5.05782	1.5115	15.2023	3.35837	2.76739	31
ANN1016	Helianthus annuus	annuus	ANN_22	DB_1829	2016 common garden	L/L	0.593002	0.457336	5.2005	5.84978	1.82285	16.058	3.13098	3.25196	27.6667
ANN1017	Helianthus annuus	annuus	ANN_22	DB_1829	2016 common garden	L/L	0.832218	0.664436	4.65339	5.62448	1.91847	15.5188	2.93319	3.33452	21.3333
ANN1018	Helianthus annuus	annuus	ANN_22	DB_1829	2016 common garden	L/S	0.47021	0.47021	4.36906	4.91593	1.47549	14.2436	3.32081	3.26849	27
ANN1019	Helianthus annuus	annuus	ANN_22	DB_1829	2016 common garden	L/L	0.684851	0.684851	5.06048	5.28092	1.44309	16.1615	3.66695	3.20411	27.6667
ANN1020	Helianthus annuus	annuus	ANN_22	DB_1829	2016 common garden	L/L	0.74817	0.74817	5.12917	5.66576	2.13494	16.1427	2.65562	3.14677	22
ANN1021	Helianthus annuus	annuus	ANN_23	DB_1830	2016 common garden	L/L	0.851881	0.703762	4.17223	5.9053	1.57295	15.8261	3.77714	3.84142	21.5
ANN1022	Helianthus annuus	annuus	ANN_23	DB_1830	2016 common garden	L/L	0.674979	0.566638	4.40383	6.21681	1.611	17.3112	3.90904	3.90156	24.5
ANN1023	Helianthus annuus	annuus	ANN_23	DB_1830	2016 common garden	L/L	0.787092	0.716122	4.79427	6.10169	2.12341	16.5982	2.92948	3.4721	20.3333
ANN1024	Helianthus annuus	annuus	ANN_23	DB_1830	2016 common garden	L/S	0.448459	0.448459	2.80759	5.47064	1.73108	13.5419	3.17085	4.84075	16
ANN1025	Helianthus annuus	annuus	ANN_23	DB_1830	2016 common garden	L/L	0.45248	0.45248	3.71285	5.24361	1.61086	13.805	3.26509	3.73872	20.6667
ANN1026	Helianthus annuus	annuus	ANN_23	DB_1830	2016 common garden	L/L	NA	NA	4.44344	6.58328	1.69753	17.5159	3.92139	3.94778	20.3333
ANN1027	Helianthus annuus	annuus	ANN_23	DB_1830	2016 common garden	L/L	0.638697	0.518263	4.55366	5.3043	2.28126	15.0793	2.29763	3.3224	22.25
ANN1028	Helianthus annuus	annuus	ANN_23	DB_1830	2016 common garden	L/L	0.482964	0.482964	3.70949	5.92511	1.88287	15.4869	3.18081	4.39685	18.75
ANN1029	Helianthus annuus	annuus	ANN_23	DB_1830	2016 common garden	L/L	0.643168	0.643168	2.93081	5.17581	1.79213	13.005	2.88953	4.46759	14.6667
ANN1030	Helianthus annuus	annuus	ANN_23	DB_1830	2016 common garden	L/L	0.780492	0.707323	4.13374	5.34131	1.69087	14.9158	3.18599	3.6169	20.3333
ANN1031	Helianthus annuus	annuus	ANN_24	DB_1831	2016 common garden	L/L	0.872415	0.829887	3.47723	4.60551	1.30951	12.8788	3.5345	3.72616	19
ANN1032	Helianthus annuus	annuus	ANN_24	DB_1831	2016 common garden	L/S	0.66978	0.559706	4.89612	6.68982	1.64878	18.1431	3.85028	3.70677	20.3333
ANN1033	Helianthus annuus	annuus	ANN_24	DB_1831	2016 common garden	L/L	0.853665	0.853665	3.47106	5.03397	1.62658	13.5366	3.0995	3.92373	17.5
ANN1034	Helianthus annuus	annuus	ANN_24	DB_1831	2016 common garden	L/L	1	1	5.38893	5.32913	1.93166	15.6659	2.77006	2.9231	20.3333
ANN1035	Helianthus annuus	annuus	ANN_24	DB_1831	2016 common garden	L/L	1	1	3.73075	3.81776	1.19331	11.4561	3.20668	3.08703	25
ANN1036	Helianthus annuus	annuus	ANN_24	DB_1831	2016 common garden	L/L	1	1	5.18918	5.09548	1.27089	15.0548	4.06396	2.90032	26.6667
ANN1037	Helianthus annuus	annuus	ANN_24	DB_1831	2016 common garden	L/L	0.833015	0.666029	4.22026	5.0539	NA	13.489	NA	3.20228	20.5
ANN1038	Helianthus annuus	annuus	ANN_24	DB_1831	2016 common garden	L/L	0.865527	0.731055	3.97921	5.81032	1.45169	15.5498	4.00961	3.91461	19.5
ANN1039	Helianthus annuus	annuus	ANN_24	DB_1831	2016 common garden	L/L	0.699415	0.599221	4.02247	5.08036	1.45701	13.8449	3.49465	3.4606	20.3333
ANN1040	Helianthus annuus	annuus	ANN_24	DB_1831	2016 common garden	L/L	0.608051	0.608051	4.31632	6.0595	1.55763	16.277	3.89164	3.7791	20.3333
ANN1041	Helianthus annuus	annuus	ANN_25	DB_1838	2016 common garden	S/S	0.422895	0.422895	3.29319	3.66757	1.74047	10.351	2.20113	3.14482	20.8
ANN1042	Helianthus annuus	annuus	ANN_25	DB_1838	2016 common garden	L/S	0.483636	0.483636	3.98291	4.24715	1.86064	12.2017	2.33404	3.07571	23.6667
ANN1043	Helianthus annuus	annuus	ANN_25	DB_1838	2016 common garden	L/L	0.509554	0.509554	3.52109	4.41492	1.99787	12.0843	2.21989	3.42477	21
ANN1044	Helianthus annuus	annuus	ANN_25	DB_1838	2016 common garden	L/L	0.43486	0.43486	3.72559	4.53292	1.52703	12.6106	2.99176	3.38736	23.3333
ANN1045	Helianthus annuus	annuus	ANN_25	DB_1838	2016 common garden	L/L	0.565991	0.565991	3.72866	4.70746	2.11069	12.8761	2.25233	3.46365	20
ANN1046	Helianthus annuus	annuus	ANN_25	DB_1838	2016 common garden	S/S	0.335146	0.335146	4.23735	4.99334	2.11629	14.0414	2.37239	3.312	24
ANN1047	Helianthus annuus	annuus	ANN_25	DB_1838	2016 common garden	L/S	0.578811	0.578811	3.74723	4.89186	2.06543	13.3904	2.39546	3.57943	19.6667
ANN1048	Helianthus annuus	annuus	ANN_25	DB_1838	2016 common garden	L/L	0.705509	0.705509	3.24433	4.38749	1.53959	11.9728	2.87172	3.68919	21.6667
ANN1049	Helianthus annuus	annuus	ANN_25	DB_1838	2016 common garden	L/S	0.414612	0.414612	3.61687	4.00435	1.42623	11.3879	2.83065	3.15839	22.3333
ANN1050	Helianthus annuus	annuus	ANN_25	DB_1838	2016 common garden	L/S	NA	NA
ANN1051	Helianthus annuus	annuus	ANN_26	DB_1839	2016 common garden	L/S	0.533139	0.533139	4.18015	5.35393	1.7323	14.6456	3.10555	3.50757	21
ANN1052	Helianthus annuus	annuus	ANN_26	DB_1839	2016 common garden	S/S	0.322236	0.322236	3.38014	4.35605	1.5138	12.0495	2.90019	3.57122	21
ANN1053	Helianthus annuus	annuus	ANN_26	DB_1839	2016 common garden	S/S	0.431982	0.431982
ANN1054	Helianthus annuus	annuus	ANN_26	DB_1839	2016 common garden	S/S	0.339129	0.339129	2.9787	5.43794	2.13246	13.2346	2.53181	4.46015	19.6667
ANN1055	Helianthus annuus	annuus	ANN_26	DB_1839	2016 common garden	L/S	0.306875	0.306875	3.1612	3.90636	1.29635	10.7635	2.96428	3.4053	20
ANN1056	Helianthus annuus	annuus	ANN_26	DB_1839	2016 common garden	S/S	0.342253	0.342253	2.88413	4.21324	1.20872	11.4436	3.38642	3.96777	21
ANN1057	Helianthus annuus	annuus	ANN_26	DB_1839	2016 common garden	L/S	0.38136	0.38136	3.08946	3.84076	1.54652	10.674	2.417	3.45267	20
ANN1058	Helianthus annuus	annuus	ANN_26	DB_1839	2016 common garden	S/S	0.505461	0.505461	3.54164	4.07888	1.89863	11.1167	2.20712	3.15217	21
ANN1059	Helianthus annuus	annuus	ANN_26	DB_1839	2016 common garden	S/S	0.539927	0.539927	2.0972	NA	NA	NA	NA	NA	19
ANN1060	Helianthus annuus	annuus	ANN_26	DB_1839	2016 common garden	S/S	0.285429	0.285429	2.61953	4.04449	1.27352	10.6935	3.25408	4.09244	18.6667
ANN1061	Helianthus annuus	annuus	ANN_27	DB_1841	2016 common garden	L/L	1	1	4.13883	4.44753	1.85179	12.6616	2.4571	3.06375	20.3333
ANN1062	Helianthus annuus	annuus	ANN_27	DB_1841	2016 common garden	L/L	1	1	5.32021	5.93476	1.85891	17.7205	3.23332	3.33064	28.6667
ANN1063	Helianthus annuus	annuus	ANN_27	DB_1841	2016 common garden	L/L	NA	NA	4.22467	5.44163	1.72187	14.5394	3.15458	3.63697	22.5
ANN1064	Helianthus annuus	annuus	ANN_27	DB_1841	2016 common garden	L/S	1	1	4.34075	6.12654	1.25256	16.1433	4.81193	3.7503	31.6667
ANN1065	Helianthus annuus	annuus	ANN_27	DB_1841	2016 common garden	L/S	NA	NA	4.97883	NA	NA	NA	NA	NA	29
ANN1066	Helianthus annuus	annuus	ANN_27	DB_1841	2016 common garden	S/S	NA	NA
ANN1067	Helianthus annuus	annuus	ANN_27	DB_1841	2016 common garden	L/S	0.69731	0.596413	4.39428	5.04802	1.66139	14.2467	3.07988	3.24786	22
ANN1068	Helianthus annuus	annuus	ANN_27	DB_1841	2016 common garden	L/S	0.663841	0.663841	3.06158	3.3658	0.935352	9.30482	3.19964	3.0362	27.6667
ANN1069	Helianthus annuus	annuus	ANN_27	DB_1841	2016 common garden	L/L	0.809271	0.745695	5.40659	5.83076	1.65879	16.6656	3.56099	3.08174	30.6667
ANN1070	Helianthus annuus	annuus	ANN_27	DB_1841	2016 common garden	L/S	1	1	4.91462	6.2258	2.21165	17.2514	2.86951	3.51714	28.3333
ANN1071	Helianthus annuus	annuus	ANN_28	DB_1843	2016 common garden	L/L	0.720448	0.627265	5.36242	3.93977	1.21511	12.9025	3.24207	2.41765	33.25
ANN1072	Helianthus annuus	annuus	ANN_28	DB_1843	2016 common garden	L/S	NA	NA	NA	NA	NA	NA	NA	NA	29
ANN1073	Helianthus annuus	annuus	ANN_28	DB_1843	2016 common garden	L/L	0.766797	0.533595	4.75632	6.14469	NA	16.7844	3.84457	3.54101	NA
ANN1074	Helianthus annuus	annuus	ANN_28	DB_1843	2016 common garden	L/L	0.650425	0.5339	4.61875	4.6433	1.33875	13.8463	3.48237	3.01952	21.6667
ANN1075	Helianthus annuus	annuus	ANN_28	DB_1843	2016 common garden	L/L	0.434845	0.434845	4.88764	6.2117	1.5831	16.7877	3.93352	3.43977	21.5
ANN1076	Helianthus annuus	annuus	ANN_28	DB_1843	2016 common garden	L/L	1	1	5.02006	5.23759	1.67987	14.9675	3.1442	3.01785	24.6667
ANN1077	Helianthus annuus	annuus	ANN_28	DB_1843	2016 common garden	L/L	0.62785	0.62785	5.16278	6.27279	1.22534	17.7198	5.19399	3.44509	24.6667
ANN1078	Helianthus annuus	annuus	ANN_28	DB_1843	2016 common garden	L/L	0.754154	0.672205	5.60659	6.63938	1.95292	18.4019	3.41684	3.34243	21.3333
ANN1079	Helianthus annuus	annuus	ANN_28	DB_1843	2016 common garden	L/L	0.814981	0.753309	4.72434	5.97107	1.40561	16.3724	4.26196	3.46281	23
ANN1080	Helianthus annuus	annuus	ANN_28	DB_1843	2016 common garden	NA	0.773809	0.698412	4.87972	4.5563	1.24108	13.7288	3.70784	2.81493	29.3333
ANN1081	Helianthus annuus	annuus	ANN_29	DB_1844	2016 common garden	L/L	0.646854	0.529139	5.6379	6.88538	1.45945	19.0661	4.74383	3.38473	40.6667
ANN1082	Helianthus annuus	annuus	ANN_29	DB_1844	2016 common garden	L/L	0.639048	0.639048	4.56525	5.75267	1.8934	16.1554	3.04348	3.55591	23.5
ANN1083	Helianthus annuus	annuus	ANN_29	DB_1844	2016 common garden	L/L	0.662681	0.550242	5.55097	5.8378	1.55065	16.5771	3.48076	2.99825	25
ANN1084	Helianthus annuus	annuus	ANN_29	DB_1844	2016 common garden	L/L	0.63966	0.519547	5.24098	6.16336	1.76648	17.0577	3.50318	3.2654	34.6667
ANN1085	Helianthus annuus	annuus	ANN_29	DB_1844	2016 common garden	L/L	0.744644	0.659525	4.29693	7.0501	2.02331	17.7745	3.48011	4.13654	22.3333
ANN1086	Helianthus annuus	annuus	ANN_29	DB_1844	2016 common garden	L/L	0.71891	0.625213	4.54039	4.99073	1.65732	14.2246	3.02562	3.13597	26.3333
ANN1087	Helianthus annuus	annuus	ANN_29	DB_1844	2016 common garden	L/L	0.688175	0.584234	4.38312	7.15755	1.92928	18.0626	3.71683	4.16474	23
ANN1088	Helianthus annuus	annuus	ANN_29	DB_1844	2016 common garden	L/L	0.729891	0.639854	4.8983	6.24861	1.96779	17.3103	3.18918	3.55547	22.75
ANN1089	Helianthus annuus	annuus	ANN_29	DB_1844	2016 common garden	L/L	0.792623	0.585246	4.77577	6.37978	1.70266	16.9901	3.81289	3.56266	31.6667
ANN1090	Helianthus annuus	annuus	ANN_29	DB_1844	2016 common garden	L/L	0.86016	0.720319	4.67653	6.53049	2.28591	17.0993	2.57622	3.66519	22
ANN1091	Helianthus annuus	annuus	ANN_30	DB_1845	2016 common garden	L/S	0.547175	0.396233	5.01303	5.22879	1.90653	15.3087	2.79089	3.06132	28
ANN1092	Helianthus annuus	annuus	ANN_30	DB_1845	2016 common garden	L/L	NA	NA							27
ANN1093	Helianthus annuus	annuus	ANN_30	DB_1845	2016 common garden	L/L	0.727794	0.637058	4.70694	6.52845	1.90804	18.1427	3.43559	3.86361	24.75
ANN1094	Helianthus annuus	annuus	ANN_30	DB_1845	2016 common garden	L/L	0.822112	0.644224	5.09381	6.37345	1.75232	17.9742	3.64378	3.52735	20.6667
ANN1095	Helianthus annuus	annuus	ANN_30	DB_1845	2016 common garden	L/S	0.418017	0.418017	4.21352	6.05138	2.06243	16.2225	2.94135	3.8544	21
ANN1096	Helianthus annuus	annuus	ANN_30	DB_1845	2016 common garden	L/L	0.572114	0.572114	3.56879	4.83212	1.82734	13.4141	2.67475	3.49242	16.6667
ANN1097	Helianthus annuus	annuus	ANN_30	DB_1845	2016 common garden	L/L	0.666815	0.666815	4.34987	6.71467	1.96401	17.5324	3.44753	4.03159	26.3333
ANN1098	Helianthus annuus	annuus	ANN_30	DB_1845	2016 common garden	L/L	0.681076	0.574768	3.87265	6.00807	2.34008	15.8974	2.57924	4.1119	20
ANN1099	Helianthus annuus	annuus	ANN_30	DB_1845	2016 common garden	L/L	1	1	4.42635	6.13705	2.12265	16.2714	2.89938	3.67577	26
ANN1100	Helianthus annuus	annuus	ANN_30	DB_1845	2016 common garden	S/S	0.486322	0.486322	4.21239	6.79227	1.73586	17.5809	3.92681	4.17557	23.6667
ANN1101	Helianthus annuus	annuus	ANN_31	DB_1846	2016 common garden	L/L	0.558387	0.558387	5.17507	5.94422	1.79352	16.6991	3.3198	3.22331	31.6667
ANN1102	Helianthus annuus	annuus	ANN_31	DB_1846	2016 common garden	L/L	NA	NA
ANN1103	Helianthus annuus	annuus	ANN_31	DB_1846	2016 common garden	L/L	0.591239	0.591239	4.7034	7.1596	1.99691	18.8556	3.61047	4.01406	24.3333
ANN1104	Helianthus annuus	annuus	ANN_31	DB_1846	2016 common garden	L/L	0.531934	0.531934	4.31721	6.26853	1.511	16.9905	4.1769	3.93155	29
ANN1105	Helianthus annuus	annuus	ANN_31	DB_1846	2016 common garden	L/S	0.545547	0.545547	5.30804	5.62507	1.63625	16.3441	3.44862	3.07912	33
ANN1106	Helianthus annuus	annuus	ANN_31	DB_1846	2016 common garden	L/L	0.508481	0.508481	4.55613	6.27229	1.84529	16.6414	3.51752	3.67489	26.6667
ANN1107	Helianthus annuus	annuus	ANN_31	DB_1846	2016 common garden	L/L	0.65243	0.65243	4.83021	4.71783	1.56926	14.3712	3.01117	2.9782	30.6667
ANN1108	Helianthus annuus	annuus	ANN_31	DB_1846	2016 common garden	L/S	0.638331	0.638331	4.30349	5.2905	1.45592	14.7913	3.60454	3.43451	33.3333
ANN1109	Helianthus annuus	annuus	ANN_31	DB_1846	2016 common garden	L/L	0.503221	0.337628	4.72344	5.7962	1.60166	16.4871	3.56473	3.50477	25
ANN1110	Helianthus annuus	annuus	ANN_31	DB_1846	2016 common garden	L/S	0.588875	0.588875	4.2434	6.18114	1.68598	16.2627	3.66129	3.83214	26
ANN1111	Helianthus annuus	annuus	ANN_32	DB_1847	2016 common garden	L/L	0.725652	0.634202	5.30577	6.29857	1.29035	17.8124	4.91004	3.35484	30.3333
ANN1112	Helianthus annuus	annuus	ANN_32	DB_1847	2016 common garden	L/L	0.596023	0.596023	4.70219	4.91087	1.90692	14.0551	2.58691	3.00177	21.3333
ANN1113	Helianthus annuus	annuus	ANN_32	DB_1847	2016 common garden	L/L	1	1	5.06404	5.5123	2.08633	15.6433	2.653	3.0891	24.3333
ANN1114	Helianthus annuus	annuus	ANN_32	DB_1847	2016 common garden	L/L	1	1	4.08127	4.84452	1.59039	13.2991	3.00211	3.2572	29
ANN1115	Helianthus annuus	annuus	ANN_32	DB_1847	2016 common garden	L/S	0.746416	0.661888	4.59966	6.22874	1.58141	16.8251	4.02764	3.66355	37.75
ANN1116	Helianthus annuus	annuus	ANN_32	DB_1847	2016 common garden	L/L	0.472488	0.472488	4.14066	6.1923	1.71431	15.9685	3.62467	3.86186	22
ANN1117	Helianthus annuus	annuus	ANN_32	DB_1847	2016 common garden	L/L	1	1	4.14109	5.60132	2.03381	14.9827	2.76616	3.63011	21
ANN1118	Helianthus annuus	annuus	ANN_32	DB_1847	2016 common garden	L/L	1	1	4.76628	5.66336	1.99502	15.8003	2.84339	3.317	26.6667
ANN1119	Helianthus annuus	annuus	ANN_32	DB_1847	2016 common garden	L/L	0.70624	0.60832	4.97351	5.38046	1.91016	15.3037	2.83215	3.07938	27.25
ANN1120	Helianthus annuus	annuus	ANN_32	DB_1847	2016 common garden	L/L	0.755173	0.673564	5.05681	5.38166	2.00949	15.5374	2.6729	3.07844	30.6667
ANN1121	Helianthus annuus	annuus	ANN_33	DB_1848	2016 common garden	L/L	0.689691	0.586254	4.80499	6.09864	1.75176	17.0899	3.44831	3.56306	32
ANN1122	Helianthus annuus	annuus	ANN_33	DB_1848	2016 common garden	L/L	0.715542	0.620722	4.66017	6.27347	2.04673	16.9539	3.08614	3.64563	27
ANN1123	Helianthus annuus	annuus	ANN_33	DB_1848	2016 common garden	L/S	0.626534	0.502045	5.44409	6.09515	1.71924	17.7613	3.58463	3.26843	30.75
ANN1124	Helianthus annuus	annuus	ANN_33	DB_1848	2016 common garden	L/L	0.697985	0.597314	4.46759	6.93333	1.69662	17.7766	4.12047	4.00537	25.6667
ANN1125	Helianthus annuus	annuus	ANN_33	DB_1848	2016 common garden	L/L	NA	NA	4.57168	5.87984	1.92672	16.5595	3.05248	3.396	29
ANN1126	Helianthus annuus	annuus	ANN_33	DB_1848	2016 common garden	L/L	0.655514	0.655514	4.72734	4.79908	1.10208	14.0881	4.37396	2.98906	32.25
ANN1127	Helianthus annuus	annuus	ANN_33	DB_1848	2016 common garden	L/S	0.45596	0.45596	5.13868	5.07886	1.9023	15.1329	2.67556	2.94521	28.6667
ANN1128	Helianthus annuus	annuus	ANN_33	DB_1848	2016 common garden	S/S	0.478861	0.478861	4.95463	6.05654	1.87381	17.098	3.24396	3.45081	25
ANN1129	Helianthus annuus	annuus	ANN_33	DB_1848	2016 common garden	L/L	0.536252	0.536252	5.11756	6.44246	2.14277	17.5432	3.02252	3.42697	28.3333
ANN1130	Helianthus annuus	annuus	ANN_33	DB_1848	2016 common garden	L/S	0.594525	0.594525	5.15831	5.82617	NA	16.2354	3.39951	3.15172	31.6667
ANN1131	Helianthus annuus	annuus	ANN_34	DB_1849	2016 common garden	L/S	0.371945	0.371945	5.39986	6.41767	1.83301	18.0864	3.53932	3.35236	39.6667
ANN1132	Helianthus annuus	annuus	ANN_34	DB_1849	2016 common garden	L/S	NA	NA
ANN1133	Helianthus annuus	annuus	ANN_34	DB_1849	2016 common garden	L/L	NA	NA	4.32566	5.79733	1.84656	15.5385	3.15554	3.58951	25
ANN1134	Helianthus annuus	annuus	ANN_34	DB_1849	2016 common garden	L/L	0.40741	0.40741	5.73496	7.68945	1.75762	20.6024	4.48486	3.6019	39.25
ANN1135	Helianthus annuus	annuus	ANN_34	DB_1849	2016 common garden	L/L	0.611365	0.481819	5.32531	7.42961	1.97264	19.6371	3.90096	3.70671	29
ANN1136	Helianthus annuus	annuus	ANN_34	DB_1849	2016 common garden	L/L	0.5353	0.3804	5.18718	7.96019	1.97384	21.0838	4.04313	4.06732	29.3333
ANN1137	Helianthus annuus	annuus	ANN_34	DB_1849	2016 common garden	L/L	0.570795	0.570795	4.65561	5.63788	1.66004	15.7602	3.39766	3.39171	25.5
ANN1138	Helianthus annuus	annuus	ANN_34	DB_1849	2016 common garden	L/L	0.707651	0.610201	4.56102	6.82645	2.14577	17.865	3.20523	3.9278	26.5
ANN1139	Helianthus annuus	annuus	ANN_34	DB_1849	2016 common garden	L/L	0.508888	0.508888	5.31857	6.21928	1.85105	17.8566	3.3662	3.35856	29.3333
ANN1140	Helianthus annuus	annuus	ANN_34	DB_1849	2016 common garden	L/L	NA	NA
ANN1141	Helianthus annuus	annuus	ANN_35	DB_1851	2016 common garden	L/S	0.596481	0.461974	3.17806	4.43511	1.60308	12.2155	2.72297	3.83598	20.3333
ANN1142	Helianthus annuus	annuus	ANN_35	DB_1851	2016 common garden	L/L	0.523496	0.523496	5.04957	6.03814	1.61531	17.8519	3.57163	3.52437	30
ANN1143	Helianthus annuus	annuus	ANN_35	DB_1851	2016 common garden	L/L	0.590924	0.590924	4.37157	4.9078	1.79974	13.5598	2.73682	3.13083	21.25
ANN1144	Helianthus annuus	annuus	ANN_35	DB_1851	2016 common garden	L/L	1	1	3.915	5.98689	1.55489	15.5466	4.01632	4.11414	17.6667
ANN1145	Helianthus annuus	annuus	ANN_35	DB_1851	2016 common garden	L/L	0.815621	0.754161	4.65409	6.8269	2.57738	17.9408	2.69011	3.85532	22
ANN1146	Helianthus annuus	annuus	ANN_35	DB_1851	2016 common garden	L/L	0.691601	0.691601	4.74572	5.6099	1.76722	15.7463	3.17784	3.31931	24.6667
ANN1147	Helianthus annuus	annuus	ANN_35	DB_1851	2016 common garden	NA	0.646924	0.529232	4.3233	4.25852	1.68775	12.7712	2.52997	2.96895	22
ANN1148	Helianthus annuus	annuus	ANN_35	DB_1851	2016 common garden	L/L	1	1	3.61361	4.91977	1.67224	13.3342	2.98247	3.70496	26
ANN1149	Helianthus annuus	annuus	ANN_35	DB_1851	2016 common garden	L/L	1	1	3.79075	5.14549	1.38443	14.021	3.75832	3.70485	20.75
ANN1150	Helianthus annuus	annuus	ANN_35	DB_1851	2016 common garden	L/L	0.71238	0.616507	4.57211	4.5731	1.64323	13.3787	2.81057	2.9307	21
ANN1151	Helianthus annuus	annuus	ANN_36	DB_1852	2016 common garden	L/L	0.845201	0.690402	6.23252	5.6878	2.1521	16.7483	2.70472	2.70355	24.3333
ANN1152	Helianthus annuus	annuus	ANN_36	DB_1852	2016 common garden	L/L	0.808112	0.616225	5.32153	4.99535	2.00185	14.5825	2.51191	2.74542	24.3333
ANN1153	Helianthus annuus	annuus	ANN_36	DB_1852	2016 common garden	L/L	0.758158	0.677544	4.99342	4.79969	1.89914	14.6484	2.54052	2.88071	21.5
ANN1154	Helianthus annuus	annuus	ANN_36	DB_1852	2016 common garden	L/L	0.676706	0.568941	3.85893	4.48841	1.64565	12.7407	2.7438	3.35832	21.5
ANN1155	Helianthus annuus	annuus	ANN_36	DB_1852	2016 common garden	L/L	0.606625	0.606625	5.39047	5.3355	2.09508	16.5546	2.55974	3.03478	25.6667
ANN1156	Helianthus annuus	annuus	ANN_36	DB_1852	2016 common garden	L/L	0.915681	0.831363	4.02568	3.26772	1.04139	10.3437	3.15328	2.60047	21.6667
ANN1157	Helianthus annuus	annuus	ANN_36	DB_1852	2016 common garden	L/L	0.68646	0.581947	6.07996	5.36576	1.9207	16.1913	2.79773	2.6649	31.6667
ANN1158	Helianthus annuus	annuus	ANN_36	DB_1852	2016 common garden	L/L	NA	NA	3.89773	5.28915	1.57692	14.3312	3.36874	3.68775	21.6667
ANN1159	Helianthus annuus	annuus	ANN_36	DB_1852	2016 common garden	L/L	NA	NA	4.71647	4.99938	1.67905	14.4077	2.99733	3.06491	26.2
ANN1160	Helianthus annuus	annuus	ANN_36	DB_1852	2016 common garden	L/L	0.720316	0.627088	4.8504	4.80291	1.93491	13.9892	2.51215	2.89494	21.3333
ANN1161	Helianthus annuus	annuus	ANN_37	DB_1854	2016 common garden	L/L	0.778061	0.704081	4.67985	4.62013	1.31758	13.7152	3.59743	2.92942	27.3333
ANN1162	Helianthus annuus	annuus	ANN_37	DB_1854	2016 common garden	L/L	0.722785	0.630381	4.36055	4.61277	1.22901	12.9343	3.76465	2.97446	22.3333
ANN1163	Helianthus annuus	annuus	ANN_37	DB_1854	2016 common garden	L/L	0.614023	0.614023	4.92379	2.56929	0.815998	9.95743	3.14967	2.02429	34.3333
ANN1164	Helianthus annuus	annuus	ANN_37	DB_1854	2016 common garden	L/L	1	1	6.40587	4.93696	1.60174	16.1378	3.06872	2.53362	27.3333
ANN1165	Helianthus annuus	annuus	ANN_37	DB_1854	2016 common garden	L/L	0.777617	0.703489	5.43787	6.88425	2.04952	19.0476	3.35833	3.5107	26.75
ANN1166	Helianthus annuus	annuus	ANN_37	DB_1854	2016 common garden	L/L	0.762025	0.6827	5.56533	5.13272	1.67716	15.2199	3.13134	2.73466	30
ANN1167	Helianthus annuus	annuus	ANN_37	DB_1854	2016 common garden	L/L	0.721178	0.628237	4.98399	6.12367	1.78539	16.9041	3.45264	3.39407	27
ANN1168	Helianthus annuus	annuus	ANN_37	DB_1854	2016 common garden	L/L	0.623006	0.623006	4.80847	3.11088	1.35327	10.9001	2.27794	2.25566	29
ANN1169	Helianthus annuus	annuus	ANN_37	DB_1854	2016 common garden	L/L	1	1	4.85745	4.83099	1.4851	13.8859	3.24891	2.85452	27
ANN1170	Helianthus annuus	annuus	ANN_37	DB_1854	2016 common garden	L/L	0.65411	0.65411	5.07497	4.60235	1.49985	13.331	3.06013	2.62828	29.6667
ANN1171	Helianthus annuus	annuus	ANN_38	DB_1861	2016 common garden	L/L	0.639985	0.51998	5.26884	5.64188	1.58986	16.5661	3.56048	3.14805	32.6667
ANN1172	Helianthus annuus	annuus	ANN_38	DB_1861	2016 common garden	L/L	0.619848	0.493131	4.99542	4.60712	1.61153	13.9722	2.85797	2.79807	34
ANN1173	Helianthus annuus	annuus	ANN_38	DB_1861	2016 common garden	L/S	0.542418	0.542418	5.44071	4.45835	1.78182	13.8555	2.8028	2.54559	36.6667
ANN1174	Helianthus annuus	annuus	ANN_38	DB_1861	2016 common garden	L/S	NA	NA	4.86541	4.87151	1.63616	15.0644	2.98801	3.09911	33.3333
ANN1175	Helianthus annuus	annuus	ANN_38	DB_1861	2016 common garden	L/L	0.471254	0.471254	4.74399	5.37316	1.31168	15.3116	4.10912	3.21928	29
ANN1176	Helianthus annuus	annuus	ANN_38	DB_1861	2016 common garden	L/L	0.498513	0.498513	5.15316	5.81223	1.42818	16.8194	4.09716	3.27012	33.6667
ANN1177	Helianthus annuus	annuus	ANN_38	DB_1861	2016 common garden	S/S	0.561942	0.561942	6.05143	6.61499	1.74006	19.3242	3.82647	3.19608	34
ANN1178	Helianthus annuus	annuus	ANN_38	DB_1861	2016 common garden	L/L	0.579185	0.579185	3.93322	5.14651	1.81948	14.1355	2.83009	3.59162	20.3333
ANN1179	Helianthus annuus	annuus	ANN_38	DB_1861	2016 common garden	L/S	0.604442	0.472589	4.85968	5.55834	1.60952	15.8904	3.49632	3.2703	30.6667
ANN1180	Helianthus annuus	annuus	ANN_38	DB_1861	2016 common garden	L/L	0.597295	0.597295	5.6094	6.04639	1.72933	17.4892	3.32668	3.12171	35
ANN1181	Helianthus annuus	annuus	ANN_39	DB_1864	2016 common garden	S/S	0.446035	0.446035	5.70589	5.56408	1.43623	17.0566	3.83926	2.98953	34.5
ANN1182	Helianthus annuus	annuus	ANN_39	DB_1864	2016 common garden	L/S	0.392029	0.392029	4.23504	4.90677	1.61695	14.0114	3.04425	3.31765	28.6667
ANN1183	Helianthus annuus	annuus	ANN_39	DB_1864	2016 common garden	S/S	0.487764	0.487764	5.54144	5.66914	1.73759	16.6265	3.26954	2.99813	42.5
ANN1184	Helianthus annuus	annuus	ANN_39	DB_1864	2016 common garden	S/S	0.428055	0.428055	4.70901	5.59239	1.64132	16.1678	3.39139	3.4325	34.4
ANN1185	Helianthus annuus	annuus	ANN_39	DB_1864	2016 common garden	L/L	0.399469	0.399469	7.09067	5.72254	1.83862	17.171	3.13948	2.42163	32
ANN1186	Helianthus annuus	annuus	ANN_39	DB_1864	2016 common garden	L/S	0.662764	0.550352	5.25042	6.4816	1.74578	18.2414	3.65511	3.47826	34
ANN1187	Helianthus annuus	annuus	ANN_39	DB_1864	2016 common garden	L/S	0.444508	0.444508	4.42466	4.84986	1.47697	14.0895	3.26156	3.18528	26
ANN1188	Helianthus annuus	annuus	ANN_39	DB_1864	2016 common garden	S/S	NA	NA	4.83808	5.40311	1.67205	15.2642	3.25483	3.162	32
ANN1189	Helianthus annuus	annuus	ANN_39	DB_1864	2016 common garden	L/S	0.488141	0.488141	4.21789	4.00728	1.30505	11.9912	3.13082	2.84253	31.5
ANN1190	Helianthus annuus	annuus	ANN_39	DB_1864	2016 common garden	L/S	0.397571	0.397571	4.66561	6.2772	1.43301	16.8926	4.44606	3.62978	32
ANN1191	Helianthus annuus	annuus	ANN_40	DB_1866	2016 common garden	S/S	0.478019	0.478019	5.60662	5.69471	1.73612	17.0662	3.31581	3.04462	24.3333
ANN1192	Helianthus annuus	annuus	ANN_40	DB_1866	2016 common garden	S/S	0.471506	0.471506	4.91493	4.74957	1.61069	14.0375	2.95258	2.8595	29
ANN1193	Helianthus annuus	annuus	ANN_40	DB_1866	2016 common garden	S/S	0.496551	0.496551	4.0134	4.34591	1.31811	12.7683	3.29909	3.18217	27.6667
ANN1194	Helianthus annuus	annuus	ANN_40	DB_1866	2016 common garden	L/L	0.568152	0.568152	5.34319	4.74961	1.61074	15.0018	2.96156	2.80863	31
ANN1195	Helianthus annuus	annuus	ANN_40	DB_1866	2016 common garden	S/S	0.427366	0.427366	5.42701	5.67808	1.52963	16.3522	3.64005	3.01343	29.3333
ANN1196	Helianthus annuus	annuus	ANN_40	DB_1866	2016 common garden	L/L	0.515879	0.515879	4.75435	5.93255	NA	16.4287	3.30914	3.45523	23
ANN1197	Helianthus annuus	annuus	ANN_40	DB_1866	2016 common garden	S/S	0.416991	0.416991	4.92602	6.82487	1.90118	18.0959	3.6064	3.67443	29
ANN1198	Helianthus annuus	annuus	ANN_40	DB_1866	2016 common garden	S/S	0.455602	0.455602	4.84338	6.3947	1.53454	16.722	4.22906	3.45582	28.6667
ANN1199	Helianthus annuus	annuus	ANN_40	DB_1866	2016 common garden	S/S	0.411278	0.411278	4.78385	5.02143	1.51556	14.2521	2.96651	2.97325	30
ANN1200	Helianthus annuus	annuus	ANN_40	DB_1866	2016 common garden	L/L	0.567836	0.567836	4.87283	5.38294	1.80811	15.2474	2.99184	3.12736	32
ANN1201	Helianthus annuus	annuus	ANN_41	DB_1871	2016 common garden	S/S	0.458856	0.458856	4.49944	5.71615	1.31846	15.8263	4.3197	3.52415	29.3333
ANN1202	Helianthus annuus	annuus	ANN_41	DB_1871	2016 common garden	L/L	NA	NA	5.00071	5.1599	1.44275	15.3932	3.58653	3.0834	31
ANN1203	Helianthus annuus	annuus	ANN_41	DB_1871	2016 common garden	S/S	0.428395	0.428395	5.25931	5.56156	1.72025	16.3368	3.23348	3.10626	32
ANN1204	Helianthus annuus	annuus	ANN_41	DB_1871	2016 common garden	L/S	NA	NA
ANN1205	Helianthus annuus	annuus	ANN_41	DB_1871	2016 common garden	S/S	0.450075	0.450075	4.40237	4.99466	1.68442	14.194	2.87272	3.10121	24
ANN1206	Helianthus annuus	annuus	ANN_41	DB_1871	2016 common garden	S/S	0.470892	0.470892	5.22413	5.51381	1.4073	16.053	3.93561	3.07979	34.75
ANN1207	Helianthus annuus	annuus	ANN_41	DB_1871	2016 common garden	S/S	0.419137	0.419137
ANN1208	Helianthus annuus	annuus	ANN_41	DB_1871	2016 common garden	L/L	1	1	4.3773	NA	NA	14.8376	2.78064	3.02547	29.6667
ANN1209	Helianthus annuus	annuus	ANN_41	DB_1871	2016 common garden	L/S	0.479868	0.479868	4.39842	5.54588	1.6581	15.3446	3.39658	3.4922	31
ANN1210	Helianthus annuus	annuus	ANN_41	DB_1871	2016 common garden	S/S	0.457332	0.457332	4.50734	5.9233	1.73527	16.567	3.48905	3.67324	26.6667
ANN1211	Helianthus annuus	annuus	ANN_42	DB_1875	2016 common garden	S/S	0.413937	0.413937	4.51328	5.81994	1.54728	16.4055	3.76934	3.63349	26.3333
ANN1212	Helianthus annuus	annuus	ANN_42	DB_1875	2016 common garden	L/S	0.46817	0.46817	4.61784	5.13318	1.75719	14.8884	2.92891	3.23153	32.3333
ANN1213	Helianthus annuus	annuus	ANN_42	DB_1875	2016 common garden	S/S	0.345022	0.345022	5.08185	6.23398	1.8788	16.6559	3.34716	3.28479	31.6667
ANN1214	Helianthus annuus	annuus	ANN_42	DB_1875	2016 common garden	S/S	0.361925	0.361925	3.96746	5.47265	1.71022	14.9098	3.22391	3.75841	24
ANN1215	Helianthus annuus	annuus	ANN_42	DB_1875	2016 common garden	NA	0.475933	0.475933	4.51644	4.85508	1.59565	13.871	3.16163	3.06786	30.6667
ANN1216	Helianthus annuus	annuus	ANN_42	DB_1875	2016 common garden	L/S	0.47334	0.47334	4.58014	5.41787	1.46575	16.0501	3.63376	3.50419	31.6667
ANN1217	Helianthus annuus	annuus	ANN_42	DB_1875	2016 common garden	S/S	0.43653	0.43653	4.76161	5.77762	1.55865	15.9675	3.716	3.3577	29.3333
ANN1218	Helianthus annuus	annuus	ANN_42	DB_1875	2016 common garden	S/S	0.468067	0.468067	4.61097	6.36672	1.49119	17.3218	4.24919	3.94265	30.6667
ANN1219	Helianthus annuus	annuus	ANN_42	DB_1875	2016 common garden	S/S	0.351639	0.351639	4.43424	5.99355	2.14185	16.5406	2.82459	3.73342	21.6667
ANN1220	Helianthus annuus	annuus	ANN_42	DB_1875	2016 common garden	L/S	0.406269	0.406269	5.556	6.10185	1.66938	17.3891	3.65927	3.13022	33.6667
ANN1221	Helianthus annuus	texanus	ANN_43	DB_1876	2016 common garden	S/S	0.20774	0.20774	4.28768	5.5193	1.81666	15.205	3.04386	3.55034	21.6667
ANN1222	Helianthus annuus	texanus	ANN_43	DB_1876	2016 common garden	NA	0.40513	0.40513	3.32743	3.36472	1.66283	10.0363	2.02946	3.03185	22.3333
ANN1223	Helianthus annuus	texanus	ANN_43	DB_1876	2016 common garden	S/S	0.300852	0.300852	3.69482	4.81051	1.73359	12.74	2.79543	3.46022	22.5
ANN1224	Helianthus annuus	texanus	ANN_43	DB_1876	2016 common garden	NA	0.286332	0.286332	3.94134	6.30346	2.01533	16.0452	3.1508	4.06675	20.6667
ANN1225	Helianthus annuus	texanus	ANN_43	DB_1876	2016 common garden	S/S	NA	NA	3.96143	5.41938	1.60763	14.8287	3.37578	3.74327	22.6667
ANN1226	Helianthus annuus	texanus	ANN_43	DB_1876	2016 common garden	S/S	0.314312	0.314312	3.89778	5.39647	2.00069	14.6552	2.72401	3.75935	26.3333
ANN1227	Helianthus annuus	texanus	ANN_43	DB_1876	2016 common garden	S/S	0.258506	0.258506	3.49352	5.39133	1.97937	14.5422	2.72219	4.16568	21.3333
ANN1228	Helianthus annuus	texanus	ANN_43	DB_1876	2016 common garden	S/S	0.156338	0.156338	3.60425	4.9146	1.49277	13.3223	3.32522	3.69203	23.6667
ANN1229	Helianthus annuus	texanus	ANN_43	DB_1876	2016 common garden	S/S	0.282578	0.282578	3.81932	3.78308	1.51855	11.314	2.51015	2.96433	27
ANN1230	Helianthus annuus	texanus	ANN_43	DB_1876	2016 common garden	S/S	0.201892	0.201892	3.91842	5.32063	1.73024	14.3837	3.12741	3.66999	25.6667
ANN1231	Helianthus annuus	texanus	ANN_44	DB_1880	2016 common garden	NA	0.180604	0.180604	3.98717	5.49435	1.77309	14.4672	3.10797	3.62951	24.6667
ANN1232	Helianthus annuus	texanus	ANN_44	DB_1880	2016 common garden	S/S	0.108096	0.108096	4.05862	5.73706	2.00888	15.417	2.86122	3.79982	22.3333
ANN1233	Helianthus annuus	texanus	ANN_44	DB_1880	2016 common garden	L/S	0.223322	0.223322	3.41261	5.0176	2.0033	13.7027	2.55034	4.03176	20.6667
ANN1234	Helianthus annuus	texanus	ANN_44	DB_1880	2016 common garden	S/S	0.186213	0.186213	4.2419	5.15662	1.89892	14.8387	2.73597	3.50056	20.6667
ANN1235	Helianthus annuus	texanus	ANN_44	DB_1880	2016 common garden	S/S	0.283159	0.283159	4.21159	5.08979	2.36071	13.8225	2.1626	3.28489	20.6667
ANN1236	Helianthus annuus	texanus	ANN_44	DB_1880	2016 common garden	S/S	0.202431	0.202431	4.25007	5.92098	1.65812	16.0144	3.59516	3.76627	21.3333
ANN1237	Helianthus annuus	texanus	ANN_44	DB_1880	2016 common garden	S/S	0.19967	0.19967	3.78058	4.07107	1.64906	11.8505	2.47478	3.07153	21
ANN1238	Helianthus annuus	texanus	ANN_44	DB_1880	2016 common garden	L/S	0.2715	0.2715	3.74831	5.38053	1.65354	14.4317	3.30634	3.86849	24
ANN1239	Helianthus annuus	texanus	ANN_44	DB_1880	2016 common garden	S/S	0.112154	0.112154	3.97596	5.16369	2.14932	14.207	2.41252	3.58291	21
ANN1240	Helianthus annuus	texanus	ANN_44	DB_1880	2016 common garden	S/S	0.191364	0.191364	3.27937	5.46686	1.64089	14.1847	3.34388	4.32261	22
ANN1241	Helianthus annuus	texanus	ANN_45	DB_1881	2016 common garden	S/S	0.311218	0.311218	3.55958	4.4772	1.30439	12.4136	3.43568	3.48129	23.6667
ANN1242	Helianthus annuus	texanus	ANN_45	DB_1881	2016 common garden	S/S	0.292663	0.292663	3.21938	4.61834	1.39284	12.2746	3.374	3.80939	20.25
ANN1243	Helianthus annuus	texanus	ANN_45	DB_1881	2016 common garden	S/S	0.290307	0.290307	3.32708	3.86051	1.45779	10.8897	2.72445	3.26182	20
ANN1244	Helianthus annuus	texanus	ANN_45	DB_1881	2016 common garden	S/S	0.264653	0.264653	3.71239	5.33219	1.50921	14.2513	3.54462	3.83832	22.6667
ANN1245	Helianthus annuus	texanus	ANN_45	DB_1881	2016 common garden	S/S	0.143366	0.143366	4.01094	5.4011	1.35465	14.4177	4.03081	3.59739	23.3333
ANN1246	Helianthus annuus	texanus	ANN_45	DB_1881	2016 common garden	S/S	0.183378	0.183378	4.02755	5.43693	1.37488	14.9083	3.96929	3.70164	24
ANN1247	Helianthus annuus	texanus	ANN_45	DB_1881	2016 common garden	S/S	0.123233	0.123233	3.16322	4.46278	1.45837	12.2574	3.11205	3.56856	18.75
ANN1248	Helianthus annuus	texanus	ANN_45	DB_1881	2016 common garden	S/S	0.192329	0.192329	3.99513	5.08899	1.46369	13.8272	3.38171	3.46157	21.6667
ANN1249	Helianthus annuus	texanus	ANN_45	DB_1881	2016 common garden	S/S	0.119727	0.119727	3.25523	3.80334	1.34745	10.2659	2.82672	3.15261	19.6667
ANN1250	Helianthus annuus	texanus	ANN_45	DB_1881	2016 common garden	S/S	0.220341	0.220341	3.09262	5.16323	1.47584	13.2737	3.50812	4.29445	22.3333
ANN1251	Helianthus annuus	annuus	ANN_46	DB_1919	2016 common garden	L/L	0.708292	0.611056	4.98154	6.02242	1.76081	16.6886	3.43223	3.34997	27.5
ANN1252	Helianthus annuus	annuus	ANN_46	DB_1919	2016 common garden	L/L	0.629752	0.506336	3.96988	4.8735	1.75716	13.4895	2.8138	3.40077	22
ANN1253	Helianthus annuus	annuus	ANN_46	DB_1919	2016 common garden	L/L	0.720573	0.62743	4.31545	5.97554	1.61624	15.8593	3.69735	3.6942	20
ANN1254	Helianthus annuus	annuus	ANN_46	DB_1919	2016 common garden	S/S	0.720502	0.627336	5.119	4.70368	1.84266	14.3918	2.55438	2.90186	23
ANN1255	Helianthus annuus	annuus	ANN_46	DB_1919	2016 common garden	L/L	0.570226	0.570226	3.95349	5.83158	1.81334	15.2237	3.17857	3.86444	15.6667
ANN1256	Helianthus annuus	annuus	ANN_46	DB_1919	2016 common garden	L/S	0.616089	0.488118	3.83164	5.85909	1.8192	15.4158	3.23039	4.02411	20
ANN1257	Helianthus annuus	annuus	ANN_46	DB_1919	2016 common garden	L/L	0.712392	0.616523	4.32136	6.31197	1.76187	16.5132	3.5815	3.81636	19.3333
ANN1258	Helianthus annuus	annuus	ANN_46	DB_1919	2016 common garden	L/S	0.578388	0.437851	4.81165	5.92205	2.03222	16.2281	2.91556	3.37503	19
ANN1259	Helianthus annuus	annuus	ANN_46	DB_1919	2016 common garden	L/L	0.723009	0.630678	4.01776	5.31561	1.54045	13.5659	3.45916	3.44436	20.3333
ANN1260	Helianthus annuus	annuus	ANN_46	DB_1919	2016 common garden	L/L	1	1	4.00681	5.65476	1.83243	14.8599	3.09015	3.71571	20.3333
ANN1261	Helianthus annuus	annuus	ANN_47	DB_1920	2016 common garden	S/S	0.272402	0.272402	3.89896	5.02669	1.64215	13.6976	3.0617	3.52238	20
ANN1262	Helianthus annuus	annuus	ANN_47	DB_1920	2016 common garden	S/S	0.444924	0.444924	4.77214	6.84049	1.76723	17.7809	3.91532	3.72765	20.6667
ANN1263	Helianthus annuus	annuus	ANN_47	DB_1920	2016 common garden	L/S	0.313088	0.313088	3.57285	4.85921	1.37937	13.0726	3.52419	3.66567	19.25
ANN1264	Helianthus annuus	annuus	ANN_47	DB_1920	2016 common garden	S/S	0.421756	0.421756	3.49469	4.46478	1.50304	12.1346	2.95325	3.4722	20.3333
ANN1265	Helianthus annuus	annuus	ANN_47	DB_1920	2016 common garden	S/S	0.254954	0.254954	3.3403	4.84456	1.251	12.8401	3.90274	3.85538	18
ANN1266	Helianthus annuus	annuus	ANN_47	DB_1920	2016 common garden	S/S	0.39286	0.39286	4.57364	4.49366	1.92531	13.1273	2.33964	2.87354	20
ANN1267	Helianthus annuus	annuus	ANN_47	DB_1920	2016 common garden	S/S	0.349506	0.349506	4.22278	5.93164	1.78581	15.7111	3.35611	3.73226	21.3333
ANN1268	Helianthus annuus	annuus	ANN_47	DB_1920	2016 common garden	S/S	0.39733	0.39733	3.79623	5.55699	1.80569	14.6736	3.10785	3.89274	21
ANN1269	Helianthus annuus	annuus	ANN_47	DB_1920	2016 common garden	S/S	0.407142	0.407142	4.33361	4.79128	1.7675	13.0882	2.71816	3.02223	23.6667
ANN1270	Helianthus annuus	annuus	ANN_47	DB_1920	2016 common garden	S/S	0.395291	0.395291	3.62274	5.36575	1.79735	14.1709	3.00978	3.93245	18.6667
ANN1291	Helianthus annuus	annuus	ANN_50	DB_1927	2016 common garden	L/L	0.846545	0.693089	5.44924	6.44959	1.41121	17.3301	4.5766	3.18175	34
ANN1292	Helianthus annuus	annuus	ANN_50	DB_1927	2016 common garden	L/L	0.823427	0.646854	4.79693	6.49317	1.41951	17.1438	4.5229	3.56993	33
ANN1293	Helianthus annuus	annuus	ANN_50	DB_1927	2016 common garden	L/L	0.832047	0.776063	4.63756	5.91364	1.8497	16.0088	3.20635	3.45335	27
ANN1294	Helianthus annuus	annuus	ANN_50	DB_1927	2016 common garden	L/L	0.648025	0.5307	5.0309	5.08428	1.71375	14.8533	2.94077	2.95519	29.6667
ANN1295	Helianthus annuus	annuus	ANN_50	DB_1927	2016 common garden	L/L	0.717803	0.623737	5.15221	5.09523	1.4317	15.4197	3.57163	2.99307	32.6667
ANN1296	Helianthus annuus	annuus	ANN_50	DB_1927	2016 common garden	L/L	NA	NA	4.92654	5.64853	1.85209	15.7059	2.99435	3.18946	28.6667
ANN1297	Helianthus annuus	annuus	ANN_50	DB_1927	2016 common garden	L/L	0.705725	0.607634	4.97569	5.39397	1.33008	15.582	4.07087	3.1272	32
ANN1298	Helianthus annuus	annuus	ANN_50	DB_1927	2016 common garden	L/L	0.532998	0.532998	4.97235	5.7299	1.35755	16.4445	4.24376	3.30773	33.3333
ANN1299	Helianthus annuus	annuus	ANN_50	DB_1927	2016 common garden	L/L	0.673593	0.564791	4.78142	5.59445	1.46305	15.6637	3.87614	3.26688	32.6667
ANN1300	Helianthus annuus	annuus	ANN_50	DB_1927	2016 common garden	L/L	0.653673	0.653673	4.33066	4.98278	1.46402	14.0787	3.43123	3.2565	31.5
ANN1301	Helianthus annuus	annuus	ANN_51	DB_1938	2016 common garden	L/L	0.696857	0.59581	4.48368	5.87687	1.58835	16.1198	3.70342	3.59894	26.3333
ANN1302	Helianthus annuus	annuus	ANN_51	DB_1938	2016 common garden	L/L	1	1	4.43322	6.34533	1.87095	16.8852	3.40139	3.81103	24
ANN1303	Helianthus annuus	annuus	ANN_51	DB_1938	2016 common garden	L/L	1	1	3.92854	5.73018	1.94629	15.497	2.98301	3.96354	22.75
ANN1304	Helianthus annuus	annuus	ANN_51	DB_1938	2016 common garden	L/L	NA	NA
ANN1305	Helianthus annuus	annuus	ANN_51	DB_1938	2016 common garden	L/L	1	1	3.72959	4.79943	1.5844	13.0191	3.0521	3.48828	23.5
ANN1306	Helianthus annuus	annuus	ANN_51	DB_1938	2016 common garden	L/L	0.850573	0.701146	4.42568	5.32491	1.42305	15.0914	3.75432	3.41149	26.3333
ANN1307	Helianthus annuus	annuus	ANN_51	DB_1938	2016 common garden	L/L	0.700356	0.600474	3.96278	4.9343	1.64445	13.7538	3.00828	3.47075	23
ANN1308	Helianthus annuus	annuus	ANN_51	DB_1938	2016 common garden	L/L	1	1	3.33962	5.46747	1.49588	13.8153	3.65853	4.1351	19.3333
ANN1309	Helianthus annuus	annuus	ANN_51	DB_1938	2016 common garden	L/L	0.824626	0.649253	4.1983	5.45801	1.59175	14.89	3.43638	3.55101	24.3333
ANN1310	Helianthus annuus	annuus	ANN_51	DB_1938	2016 common garden	L/L	0.8019	0.6038	3.60501	4.92161	NA	13.431	4.3547	3.73173	22.3333
ANN1311	Helianthus annuus	annuus	ANN_52	DB_1941	2016 common garden	S/S	0.371374	0.371374	5.42183	4.66699	1.79805	14.6089	2.59793	2.70664	28.3333
ANN1312	Helianthus annuus	annuus	ANN_52	DB_1941	2016 common garden	S/S	0.377297	0.377297	4.19129	4.61184	1.57769	13.2085	2.96891	3.15603	25.5
ANN1313	Helianthus annuus	annuus	ANN_52	DB_1941	2016 common garden	S/S	0.339161	0.339161	4.80483	6.13998	1.72604	16.8386	3.57557	3.50703	26
ANN1314	Helianthus annuus	annuus	ANN_52	DB_1941	2016 common garden	S/S	0.279333	0.279333	3.75559	5.35309	1.25657	14.4033	4.3401	3.83785	24
ANN1315	Helianthus annuus	annuus	ANN_52	DB_1941	2016 common garden	L/S	0.464469	0.464469	4.59866	5.44893	1.61748	15.113	3.37063	3.28727	21
ANN1316	Helianthus annuus	annuus	ANN_52	DB_1941	2016 common garden	S/S	0.467297	0.467297	4.3125	4.2945	1.27231	12.547	3.38588	2.90917	23.3333
ANN1317	Helianthus annuus	annuus	ANN_52	DB_1941	2016 common garden	S/S	0.221486	0.221486	5.23238	5.65825	1.67639	16.2435	3.38771	3.10356	26.6667
ANN1318	Helianthus annuus	annuus	ANN_52	DB_1941	2016 common garden	S/S	0.351414	0.351414	4.94074	5.49352	1.95213	15.4038	2.82582	3.1166	24.25
ANN1319	Helianthus annuus	annuus	ANN_52	DB_1941	2016 common garden	L/S	0.484101	0.484101	4.46193	4.97553	1.68144	13.926	2.96545	3.12589	21
ANN1320	Helianthus annuus	annuus	ANN_52	DB_1941	2016 common garden	S/S	0.282903	0.282903	4.43227	6.07459	1.31832	16.3893	4.63434	3.69834	23.3333
ANN1321	Helianthus annuus	annuus	ANN_53	DB_1942	2016 common garden	S/S	0.442172	0.442172	4.83946	4.35514	1.47854	13.2888	2.95027	2.74633	24.6667
ANN1322	Helianthus annuus	annuus	ANN_53	DB_1942	2016 common garden	S/S	0.317673	0.317673	4.42804	5.68249	1.88996	16.1803	3.02254	3.66054	23.6667
ANN1323	Helianthus annuus	annuus	ANN_53	DB_1942	2016 common garden	S/S	0.49031	0.49031	3.79898	4.62223	1.62469	12.686	2.87368	3.34416	21.6667
ANN1324	Helianthus annuus	annuus	ANN_53	DB_1942	2016 common garden	S/S	0.454535	0.454535	4.6667	5.32246	1.3241	14.8711	4.08112	3.18931	30
ANN1325	Helianthus annuus	annuus	ANN_53	DB_1942	2016 common garden	L/S	0.515951	0.515951	4.26977	5.17186	1.47973	14.3899	3.49891	3.37011	28.5
ANN1326	Helianthus annuus	annuus	ANN_53	DB_1942	2016 common garden	S/S	0.42271	0.42271	4.11596	4.95937	1.57771	13.8215	3.11452	3.36353	23.6667
ANN1327	Helianthus annuus	annuus	ANN_53	DB_1942	2016 common garden	L/S	0.483875	0.483875	3.57328	4.82722	1.38971	13.219	3.49622	3.70009	22.3333
ANN1328	Helianthus annuus	annuus	ANN_53	DB_1942	2016 common garden	S/S	0.328461	0.328461	4.90471	5.57027	1.61573	15.8628	3.45926	3.23579	21
ANN1329	Helianthus annuus	annuus	ANN_53	DB_1942	2016 common garden	L/S	0.446273	0.446273	4.23619	5.57604	1.98859	15.0929	2.82039	3.56467	21.6667
ANN1330	Helianthus annuus	annuus	ANN_53	DB_1942	2016 common garden	S/S	0.365011	0.365011	4.01781	4.30534	1.51223	12.2207	2.86517	3.04681	25.3333
ANN1331	Helianthus annuus	texanus	ANN_54	DB_1951	2016 common garden	S/S	0.24422	0.24422	3.82141	4.2071	1.37	11.7041	3.07754	3.06579	30.6667
ANN1332	Helianthus annuus	texanus	ANN_54	DB_1951	2016 common garden	S/S	0.203363	0.203363	3.4245	4.74093	1.34115	13.2305	3.55053	3.8607	21.6667
ANN1333	Helianthus annuus	texanus	ANN_54	DB_1951	2016 common garden	S/S	0.152907	0.152907	3.85927	4.8373	1.28335	13.1528	3.81251	3.40976	28
ANN1334	Helianthus annuus	texanus	ANN_54	DB_1951	2016 common garden	S/S	0.245885	0.245885	3.91249	3.91518	1.24228	11.7191	3.19409	2.99893	30.5
ANN1335	Helianthus annuus	texanus	ANN_54	DB_1951	2016 common garden	S/S	0.209737	0.209737	3.53733	4.73038	1.28612	12.6525	3.73524	3.57767	20.6667
ANN1336	Helianthus annuus	texanus	ANN_54	DB_1951	2016 common garden	S/S	0.249081	0.249081	3.93122	4.95495	1.44021	13.6067	3.46137	3.46244	25
ANN1337	Helianthus annuus	texanus	ANN_54	DB_1951	2016 common garden	S/S	0.259767	0.259767	2.3403	3.04137	0.926617	8.24215	3.2994	3.59812	20.5
ANN1338	Helianthus annuus	texanus	ANN_54	DB_1951	2016 common garden	S/S	0.286006	0.286006	4.33134	4.89038	1.8271	13.6804	2.69192	3.1597	25.25
ANN1339	Helianthus annuus	texanus	ANN_54	DB_1951	2016 common garden	NA	0.224568	0.224568	3.49361	5.06387	1.58737	13.2896	3.1903	3.79998	20.3333
ANN1340	Helianthus annuus	texanus	ANN_54	DB_1951	2016 common garden	S/S	0.269251	0.269251	3.03814	3.77173	0.834391	10.6917	4.55069	3.51842	26.6667
ANN1341	Helianthus annuus	texanus	ANN_55	DB_1954	2016 common garden	NA	0.394596	0.394596	3.74973	5.35652	1.94334	14.2389	2.77402	3.7889	19.3333
ANN1342	Helianthus annuus	texanus	ANN_55	DB_1954	2016 common garden	S/S	0.233037	0.233037	2.78064	5.04337	1.80967	12.9776	2.82986	4.6663	20.6667
ANN1343	Helianthus annuus	texanus	ANN_55	DB_1954	2016 common garden	S/S	0.200492	0.200492	3.81103	4.81795	1.46774	13.4837	3.30439	3.54257	28.3333
ANN1344	Helianthus annuus	texanus	ANN_55	DB_1954	2016 common garden	S/S	0.238222	0.238222	3.48743	5.6392	1.70351	15.5594	3.29823	4.37937	21.3333
ANN1345	Helianthus annuus	texanus	ANN_55	DB_1954	2016 common garden	S/S	0.225471	0.225471	3.61064	5.69805	1.80654	14.5947	3.15994	4.043	20.6667
ANN1346	Helianthus annuus	texanus	ANN_55	DB_1954	2016 common garden	S/S	0.114085	0.114085	3.45268	4.7303	1.70903	12.909	2.77515	3.74532	20.6667
ANN1347	Helianthus annuus	texanus	ANN_55	DB_1954	2016 common garden	S/S	0.119859	0.119859	3.52092	5.66215	2.08089	14.9634	2.7133	4.25517	20.3333
ANN1348	Helianthus annuus	texanus	ANN_55	DB_1954	2016 common garden	NA	0.116292	0.116292	3.28955	5.17021	1.45161	13.6155	3.66936	4.14185	21
ANN1349	Helianthus annuus	texanus	ANN_55	DB_1954	2016 common garden	S/S	0.22851	0.22851	3.67072	6.35216	2.0339	16.5048	3.14374	4.49879	22.3333
ANN1350	Helianthus annuus	texanus	ANN_55	DB_1954	2016 common garden	S/S	0.175893	0.175893	3.91528	5.84808	1.83224	15.2766	3.19732	3.90444	26
ANN1351	Helianthus annuus	texanus	ANN_56	DB_1956	2016 common garden	S/S	0.358261	0.358261	3.89032	5.18114	1.7126	14.13	3.11051	3.63713	23
ANN1352	Helianthus annuus	texanus	ANN_56	DB_1956	2016 common garden	S/S	0.221252	0.221252	4.11136	4.55109	1.60451	13.1971	2.8519	3.21464	28.6667
ANN1353	Helianthus annuus	texanus	ANN_56	DB_1956	2016 common garden	S/S	0.422485	0.422485	3.96457	5.16364	1.86958	13.9003	2.77167	3.50585	21
ANN1354	Helianthus annuus	texanus	ANN_56	DB_1956	2016 common garden	NA	0.268814	0.268814	4.19059	5.59422	1.9865	15.5437	2.84449	3.71284	21.5
ANN1355	Helianthus annuus	texanus	ANN_56	DB_1956	2016 common garden	S/S	0.232917	0.232917	2.91914	5.24371	1.8187	13.1341	2.88602	4.50955	20
ANN1356	Helianthus annuus	texanus	ANN_56	DB_1956	2016 common garden	S/S	0.242416	0.242416	3.6554	4.70037	2.0513	12.9127	2.29907	3.53414	20.3333
ANN1357	Helianthus annuus	texanus	ANN_56	DB_1956	2016 common garden	S/S	0.211259	0.211259	3.64965	6.1944	2.10207	15.6673	2.95778	4.31268	20.6667
ANN1358	Helianthus annuus	texanus	ANN_56	DB_1956	2016 common garden	S/S	0.21372	0.21372	3.57689	5.45661	2.14389	14.5349	2.56876	4.06715	20.6667
ANN1359	Helianthus annuus	texanus	ANN_56	DB_1956	2016 common garden	NA	0.227549	0.227549	3.71178	5.70973	2.0125	14.9842	2.84051	4.03825	20.6667
ANN1360	Helianthus annuus	texanus	ANN_56	DB_1956	2016 common garden	NA	0.360921	0.360921	3.76799	5.775	1.84812	14.8859	3.12744	3.95676	20.6667
ANN1361	Helianthus annuus	texanus	ANN_57	DB_1968	2016 common garden	S/S	0.281387	0.281387	3.81126	5.01108	1.75209	13.8116	2.88738	3.6196	28.3333
ANN1362	Helianthus annuus	texanus	ANN_57	DB_1968	2016 common garden	S/S	0.198671	0.198671	3.44364	4.8984	1.7834	13.0033	2.75648	3.78101	21.6667
ANN1363	Helianthus annuus	texanus	ANN_57	DB_1968	2016 common garden	S/S	0.262295	0.262295	3.70687	6.52585	2.20987	16.5663	3.00723	4.48739	26
ANN1364	Helianthus annuus	texanus	ANN_57	DB_1968	2016 common garden	L/S	0.259648	0.259648	3.7122	6.47132	1.80725	16.3624	3.58322	4.40314	21.5
ANN1365	Helianthus annuus	texanus	ANN_57	DB_1968	2016 common garden	S/S	0.207211	0.207211	3.30844	4.95959	1.5886	13.3768	3.13528	4.0408	21.25
ANN1366	Helianthus annuus	texanus	ANN_57	DB_1968	2016 common garden	S/S	0.330228	0.330228	3.8861	4.9159	1.87081	14.0066	2.65289	3.61339	20.3333
ANN1367	Helianthus annuus	texanus	ANN_57	DB_1968	2016 common garden	S/S	0.220138	0.220138	3.57295	5.19993	1.61135	13.7554	3.23557	3.84698	25.3333
ANN1368	Helianthus annuus	texanus	ANN_57	DB_1968	2016 common garden	S/S	0.255493	0.255493	4.26052	4.96923	1.40031	13.8365	3.56865	3.2517	35
ANN1369	Helianthus annuus	texanus	ANN_57	DB_1968	2016 common garden	NA	0.312138	0.312138	3.37936	5.46285	1.8028	13.983	3.03031	4.14741	22
ANN1370	Helianthus annuus	texanus	ANN_57	DB_1968	2016 common garden	S/S	0.337977	0.337977	3.30564	4.56683	1.77736	12.5268	2.58039	3.79216	20.6667
ANN1371	Helianthus annuus	texanus	ANN_58	DB_1973	2016 common garden	S/S	0.222187	0.222187	3.47401	4.0689	1.55634	11.1045	2.62883	3.19765	23.6667
ANN1372	Helianthus annuus	texanus	ANN_58	DB_1973	2016 common garden	S/S	0.135213	0.135213	3.36928	5.74675	1.43548	14.7991	3.96081	4.39566	20.6667
ANN1373	Helianthus annuus	texanus	ANN_58	DB_1973	2016 common garden	S/S	0.154118	0.154118	3.48492	5.72558	1.83385	14.662	3.12523	4.22763	19.6667
ANN1374	Helianthus annuus	texanus	ANN_58	DB_1973	2016 common garden	S/S	0.105572	0.105572	3.45522	4.75758	1.7655	12.8384	2.69643	3.72477	20.3333
ANN1375	Helianthus annuus	texanus	ANN_58	DB_1973	2016 common garden	S/S	0.197681	0.197681	3.56836	5.29566	1.53422	13.871	3.47314	3.88749	25.3333
ANN1376	Helianthus annuus	texanus	ANN_58	DB_1973	2016 common garden	S/S	0.250456	0.250456	3.58015	4.4804	1.04137	12.5682	4.32441	3.51178	21.6667
ANN1377	Helianthus annuus	texanus	ANN_58	DB_1973	2016 common garden	S/S	0.211287	0.211287	3.33091	4.37525	1.33408	12.061	3.27571	3.63331	22
ANN1378	Helianthus annuus	texanus	ANN_58	DB_1973	2016 common garden	S/S	0.144692	0.144692	3.2091	5.86231	1.76888	15.0684	3.32324	4.70381	22.3333
ANN1379	Helianthus annuus	texanus	ANN_58	DB_1973	2016 common garden	NA	0.163208	0.163208	3.63459	4.70868	1.95384	13.3127	2.41971	3.6643	27
ANN1380	Helianthus annuus	texanus	ANN_58	DB_1973	2016 common garden	S/S	0.216468	0.216468	3.66096	3.87907	1.11157	10.9819	3.5121	3.0003	24
ANN1381	Helianthus annuus	texanus	ANN_59	DB_1976	2016 common garden	S/S	0.143041	0.143041	4.14158	5.43063	1.53212	15.0569	3.60403	3.63304	26
ANN1382	Helianthus annuus	texanus	ANN_59	DB_1976	2016 common garden	S/S	0.252949	0.252949	3.20687	4.26111	1.36511	11.8206	3.25805	3.68357	23.6667
ANN1383	Helianthus annuus	texanus	ANN_59	DB_1976	2016 common garden	S/S	0.20321	0.20321	3.37759	5.32653	1.56542	13.9969	3.42256	4.15513	24
ANN1384	Helianthus annuus	texanus	ANN_59	DB_1976	2016 common garden	NA	0.18092	0.18092	3.98297	5.06048	1.76468	13.7464	2.89917	3.47271	21.3333
ANN1385	Helianthus annuus	texanus	ANN_59	DB_1976	2016 common garden	NA	0.215067	0.215067	3.31937	5.07977	1.67018	13.0916	3.06349	3.95158	22
ANN1386	Helianthus annuus	texanus	ANN_59	DB_1976	2016 common garden	S/S	0.148537	0.148537	2.93101	4.86755	1.94672	12.3872	2.52406	4.23432	19.3333
ANN1387	Helianthus annuus	texanus	ANN_59	DB_1976	2016 common garden	S/S	0.116857	0.116857	2.84934	3.86402	1.65963	10.4776	2.43687	3.67574	20.6667
ANN1388	Helianthus annuus	texanus	ANN_59	DB_1976	2016 common garden	S/S	0.170965	0.170965	3.92358	4.68727	1.38042	13.1356	3.40642	3.3529	25.6667
ANN1389	Helianthus annuus	texanus	ANN_59	DB_1976	2016 common garden	S/S	0.239107	0.239107	3.55527	3.64418	1.59274	10.7916	2.29321	3.05864	22.5
ANN1390	Helianthus annuus	texanus	ANN_59	DB_1976	2016 common garden	S/S	0.215335	0.215335	3.97064	4.03481	1.60467	12.2576	2.53747	3.09216	25.3333
ANN1391	Helianthus annuus	texanus	ANN_60	DB_1981	2016 common garden	S/S	0.219078	0.219078	3.45939	6.01765	1.78551	15.0817	3.39496	4.37465	20.5
ANN1392	Helianthus annuus	texanus	ANN_60	DB_1981	2016 common garden	S/S	0.258454	0.258454	2.96212	3.94148	1.56339	10.9628	2.52551	3.70784	21.3333
ANN1393	Helianthus annuus	texanus	ANN_60	DB_1981	2016 common garden	S/S	0.186041	0.186041	3.66334	5.64925	1.9071	14.7472	2.96042	4.02523	27.3333
ANN1394	Helianthus annuus	texanus	ANN_60	DB_1981	2016 common garden	S/S	0.190582	0.190582	3.24132	4.51976	1.999	12.1012	2.26553	3.75682	20.6667
ANN1395	Helianthus annuus	texanus	ANN_60	DB_1981	2016 common garden	S/S	0.172613	0.172613	3.73111	4.69456	1.6798	12.9889	2.80765	3.49841	21
ANN1396	Helianthus annuus	texanus	ANN_60	DB_1981	2016 common garden	S/S	0.273107	0.273107	2.57457	3.69606	NA	9.97121	NA	3.88878	24.5
ANN1397	Helianthus annuus	texanus	ANN_60	DB_1981	2016 common garden	S/S	0.154587	0.154587	3.13796	4.224	1.34608	11.8511	3.13648	3.54971	20.6667
ANN1398	Helianthus annuus	texanus	ANN_60	DB_1981	2016 common garden	S/S	0.166452	0.166452	3.28728	4.05327	1.71657	11.333	2.35722	3.47461	18.3333
ANN1399	Helianthus annuus	texanus	ANN_60	DB_1981	2016 common garden	S/S	0.16118	0.16118	3.72561	6.21474	1.93627	15.9744	3.22256	4.31147	21
ANN1400	Helianthus annuus	texanus	ANN_60	DB_1981	2016 common garden	S/S	0.2364	0.2364	3.08478	4.80833	1.5741	12.7867	3.04909	4.14109	20.3333
ANN1401	Helianthus annuus	texanus	ANN_61	DB_1990	2016 common garden	S/S	0.138167	0.138167	3.94219	4.02475	1.718	11.5877	2.4547	2.96233	24.6667
ANN1402	Helianthus annuus	texanus	ANN_61	DB_1990	2016 common garden	S/S	0.143241	0.143241	4.09988	5.22442	1.44094	14.1993	3.64303	3.47174	28.5
ANN1403	Helianthus annuus	texanus	ANN_61	DB_1990	2016 common garden	S/S	0.22092	0.22092	4.27767	5.54777	1.87496	15.5852	2.97027	3.64337	23
ANN1404	Helianthus annuus	texanus	ANN_61	DB_1990	2016 common garden	S/S	0.170749	0.170749	3.94936	6.39881	2.03122	16.6486	3.15704	4.21636	20.6667
ANN1405	Helianthus annuus	texanus	ANN_61	DB_1990	2016 common garden	S/S	0.22773	0.22773	3.5803	4.55462	1.56166	12.58	2.93582	3.5135	26
ANN1406	Helianthus annuus	texanus	ANN_61	DB_1990	2016 common garden	S/S	0.302754	0.302754	3.65817	5.94662	1.56878	15.2989	3.79556	4.17864	21.6667
ANN1407	Helianthus annuus	texanus	ANN_61	DB_1990	2016 common garden	S/S	0.113729	0.113729	3.83715	4.39839	1.76893	12.2752	2.50066	3.19681	27.3333
ANN1408	Helianthus annuus	texanus	ANN_61	DB_1990	2016 common garden	S/S	0.142526	0.142526	3.94166	4.61125	1.73878	12.9235	2.65859	3.32928	28
ANN1409	Helianthus annuus	texanus	ANN_61	DB_1990	2016 common garden	S/S	0.226485	0.226485	3.71058	5.30319	2.00276	14.1928	2.63525	3.83042	22.6667
ANN1410	Helianthus annuus	texanus	ANN_61	DB_1990	2016 common garden	S/S	0.316642	0.316642	3.87371	4.50428	1.46898	11.3351	3.04428	2.89858	28.8
ANN1411	Helianthus annuus	annuus	ANN_62	DB_2157, IA1W	2016 common garden	NA	0.55419	0.55419
ANN1412	Helianthus annuus	annuus	ANN_62	DB_2157, IA1W	2016 common garden	NA	0.625907	0.625907
ANN1413	Helianthus annuus	annuus	ANN_62	DB_2157, IA1W	2016 common garden	NA	0.628427	0.628427
ANN1414	Helianthus annuus	annuus	ANN_62	DB_2157, IA1W	2016 common garden	NA	NA
ANN1415	Helianthus annuus	annuus	ANN_62	DB_2157, IA1W	2016 common garden	NA	0.597182	0.597182
ANN1416	Helianthus annuus	annuus	ANN_62	DB_2157, IA1W	2016 common garden	NA	0.640836	0.640836
ANN1417	Helianthus annuus	annuus	ANN_62	DB_2157, IA1W	2016 common garden	NA	0.58497	0.58497
ANN1418	Helianthus annuus	annuus	ANN_62	DB_2157, IA1W	2016 common garden	NA	0.605052	0.473403
ANN1419	Helianthus annuus	annuus	ANN_62	DB_2157, IA1W	2016 common garden	L/L	0.338616	0.338616	5.33658	6.26509	1.87329	17.3377	3.38035	3.25218	32.5
ANN1420	Helianthus annuus	annuus	ANN_62	DB_2157, IA1W	2016 common garden	L/L	0.546225	0.546225	4.25359	5.51894	1.54754	15.0539	3.61512	3.52839	23
ANN1421	Helianthus annuus	annuus	ANN_63	DB_2156, IA2W	2016 common garden	NA	0.478545	0.478545
ANN1422	Helianthus annuus	annuus	ANN_63	DB_2156, IA2W	2016 common garden	NA	0.876652	0.753305
ANN1423	Helianthus annuus	annuus	ANN_63	DB_2156, IA2W	2016 common garden	NA	NA
ANN1424	Helianthus annuus	annuus	ANN_63	DB_2156, IA2W	2016 common garden	NA	0.587162	0.44955
ANN1425	Helianthus annuus	annuus	ANN_63	DB_2156, IA2W	2016 common garden	NA	0.819904	0.639808
ANN1426	Helianthus annuus	annuus	ANN_63	DB_2156, IA2W	2016 common garden	NA	0.68995	0.68995
ANN1427	Helianthus annuus	annuus	ANN_63	DB_2156, IA2W	2016 common garden	NA	0.693534	0.591378
ANN1428	Helianthus annuus	annuus	ANN_63	DB_2156, IA2W	2016 common garden	NA	0.676008	0.568011
ANN1429	Helianthus annuus	annuus	ANN_63	DB_2156, IA2W	2016 common garden	NA	0.494036	0.494036
ANN1430	Helianthus annuus	annuus	ANN_63	DB_2156, IA2W	2016 common garden	NA	0.790596	0.720795
ANN1431	Helianthus annuus	annuus	ANN_64	DB_2154, KS1W	2016 common garden	NA	NA
ANN1432	Helianthus annuus	annuus	ANN_64	DB_2154, KS1W	2016 common garden	NA	0.359963	0.359963
ANN1433	Helianthus annuus	annuus	ANN_64	DB_2154, KS1W	2016 common garden	NA	0.76123	0.681641
ANN1434	Helianthus annuus	annuus	ANN_64	DB_2154, KS1W	2016 common garden	NA	0.367709	0.367709
ANN1435	Helianthus annuus	annuus	ANN_64	DB_2154, KS1W	2016 common garden	NA	0.523015	0.523015
ANN1436	Helianthus annuus	annuus	ANN_64	DB_2154, KS1W	2016 common garden	NA	0.563126	0.563126
ANN1437	Helianthus annuus	annuus	ANN_64	DB_2154, KS1W	2016 common garden	NA	NA
ANN1438	Helianthus annuus	annuus	ANN_64	DB_2154, KS1W	2016 common garden	NA	0.510126	0.510126
ANN1439	Helianthus annuus	annuus	ANN_64	DB_2154, KS1W	2016 common garden	L/L	0.589554	0.589554	4.78835	5.13697	1.87889	14.8485	2.68933	3.28698	28
ANN1440	Helianthus annuus	annuus	ANN_64	DB_2154, KS1W	2016 common garden	NA	0.651281	0.535042
ANN1441	Helianthus annuus	annuus	ANN_65	DB_2153, KS2W	2016 common garden	NA	0.696928	0.595904
ANN1442	Helianthus annuus	annuus	ANN_65	DB_2153, KS2W	2016 common garden	NA	0.56757	0.56757
ANN1443	Helianthus annuus	annuus	ANN_65	DB_2153, KS2W	2016 common garden	NA	0.77351	0.547019
ANN1444	Helianthus annuus	annuus	ANN_65	DB_2153, KS2W	2016 common garden	NA	0.667274	0.556365
ANN1445	Helianthus annuus	annuus	ANN_65	DB_2153, KS2W	2016 common garden	NA	1	1
ANN1446	Helianthus annuus	annuus	ANN_65	DB_2153, KS2W	2016 common garden	NA	0.831908	0.663815
ANN1447	Helianthus annuus	annuus	ANN_65	DB_2153, KS2W	2016 common garden	NA	0.716712	0.622282
ANN1448	Helianthus annuus	annuus	ANN_65	DB_2153, KS2W	2016 common garden	NA	0.593827	0.593827
ANN1449	Helianthus annuus	annuus	ANN_65	DB_2153, KS2W	2016 common garden	NA	0.517046	0.517046
ANN1450	Helianthus annuus	annuus	ANN_65	DB_2153, KS2W	2016 common garden	NA	0.849008	0.698015
ANN1451	Helianthus annuus	annuus	ANN_66	DB_2166, MB1W	2016 common garden	NA	0.467065	0.467065
ANN1452	Helianthus annuus	annuus	ANN_66	DB_2166, MB1W	2016 common garden	NA	0.559711	0.559711
ANN1453	Helianthus annuus	annuus	ANN_66	DB_2166, MB1W	2016 common garden	NA	NA	NA
ANN1454	Helianthus annuus	annuus	ANN_66	DB_2166, MB1W	2016 common garden	NA	NA	NA
ANN1455	Helianthus annuus	annuus	ANN_66	DB_2166, MB1W	2016 common garden	NA	0.495767	0.495767
ANN1456	Helianthus annuus	annuus	ANN_66	DB_2166, MB1W	2016 common garden	NA	0.537068	0.537068
ANN1457	Helianthus annuus	annuus	ANN_66	DB_2166, MB1W	2016 common garden	NA	0.607538	0.607538
ANN1458	Helianthus annuus	annuus	ANN_66	DB_2166, MB1W	2016 common garden	NA	NA
ANN1459	Helianthus annuus	annuus	ANN_66	DB_2166, MB1W	2016 common garden	NA	NA
ANN1460	Helianthus annuus	annuus	ANN_66	DB_2166, MB1W	2016 common garden	NA	NA	NA
ANN1461	Helianthus annuus	annuus	ANN_67	DB_2155, MO1W	2016 common garden	NA	NA
ANN1462	Helianthus annuus	annuus	ANN_67	DB_2155, MO1W	2016 common garden	NA	0.540151	0.540151
ANN1463	Helianthus annuus	annuus	ANN_67	DB_2155, MO1W	2016 common garden	NA	0.496764	0.496764
ANN1464	Helianthus annuus	annuus	ANN_67	DB_2155, MO1W	2016 common garden	NA	0.511848	0.511848
ANN1465	Helianthus annuus	annuus	ANN_67	DB_2155, MO1W	2016 common garden	NA	NA
ANN1466	Helianthus annuus	annuus	ANN_67	DB_2155, MO1W	2016 common garden	NA	0.407437	0.407437
ANN1467	Helianthus annuus	annuus	ANN_67	DB_2155, MO1W	2016 common garden	NA	0.424043	0.424043
ANN1468	Helianthus annuus	annuus	ANN_67	DB_2155, MO1W	2016 common garden	NA	NA
ANN1469	Helianthus annuus	annuus	ANN_67	DB_2155, MO1W	2016 common garden	NA	1	1
ANN1470	Helianthus annuus	annuus	ANN_67	DB_2155, MO1W	2016 common garden	NA	0.493016	0.493016
ANN1471	Helianthus annuus	annuus	ANN_68	DB_2162, ND1W	2016 common garden	NA	0.788223	0.576446
ANN1472	Helianthus annuus	annuus	ANN_68	DB_2162, ND1W	2016 common garden	NA	NA
ANN1473	Helianthus annuus	annuus	ANN_68	DB_2162, ND1W	2016 common garden	NA	0.751795	0.66906
ANN1474	Helianthus annuus	annuus	ANN_68	DB_2162, ND1W	2016 common garden	NA	0.64332	0.64332
ANN1475	Helianthus annuus	annuus	ANN_68	DB_2162, ND1W	2016 common garden	NA	0.523119	0.523119
ANN1476	Helianthus annuus	annuus	ANN_68	DB_2162, ND1W	2016 common garden	NA	1	1
ANN1477	Helianthus annuus	annuus	ANN_68	DB_2162, ND1W	2016 common garden	NA	1	1
ANN1478	Helianthus annuus	annuus	ANN_68	DB_2162, ND1W	2016 common garden	NA	0.745283	0.745283
ANN1479	Helianthus annuus	annuus	ANN_68	DB_2162, ND1W	2016 common garden	NA	0.74894	0.665253
ANN1480	Helianthus annuus	annuus	ANN_68	DB_2162, ND1W	2016 common garden	NA	1	1
ANN1481	Helianthus annuus	annuus	ANN_69	DB_2160, SD1W	2016 common garden	NA	0.621091	0.621091
ANN1482	Helianthus annuus	annuus	ANN_69	DB_2160, SD1W	2016 common garden	NA	0.660907	0.660907
ANN1483	Helianthus annuus	annuus	ANN_69	DB_2160, SD1W	2016 common garden	NA	0.715984	0.715984
ANN1484	Helianthus annuus	annuus	ANN_69	DB_2160, SD1W	2016 common garden	NA	1	1
ANN1485	Helianthus annuus	annuus	ANN_69	DB_2160, SD1W	2016 common garden	NA	0.507161	0.507161
ANN1486	Helianthus annuus	annuus	ANN_69	DB_2160, SD1W	2016 common garden	NA	0.814875	0.753167
ANN1487	Helianthus annuus	annuus	ANN_69	DB_2160, SD1W	2016 common garden	NA	0.492097	0.492097
ANN1488	Helianthus annuus	annuus	ANN_69	DB_2160, SD1W	2016 common garden	NA	1	1
ANN1489	Helianthus annuus	annuus	ANN_69	DB_2160, SD1W	2016 common garden	NA	0.624232	0.624232
ANN1490	Helianthus annuus	annuus	ANN_69	DB_2160, SD1W	2016 common garden	NA	0.675105	0.675105
ANN1491	Helianthus annuus	annuus	ANN_70	DB_2158, SD2W	2016 common garden	NA	0.357692	0.357692
ANN1492	Helianthus annuus	annuus	ANN_70	DB_2158, SD2W	2016 common garden	NA	0.487051	0.487051
ANN1493	Helianthus annuus	annuus	ANN_70	DB_2158, SD2W	2016 common garden	NA	0.70394	0.70394
ANN1494	Helianthus annuus	annuus	ANN_70	DB_2158, SD2W	2016 common garden	NA	NA
ANN1495	Helianthus annuus	annuus	ANN_70	DB_2158, SD2W	2016 common garden	NA	NA
ANN1496	Helianthus annuus	annuus	ANN_70	DB_2158, SD2W	2016 common garden	NA	0.528286	0.528286
ANN1497	Helianthus annuus	annuus	ANN_70	DB_2158, SD2W	2016 common garden	NA	NA
ANN1498	Helianthus annuus	annuus	ANN_70	DB_2158, SD2W	2016 common garden	NA	NA
ANN1499	Helianthus annuus	annuus	ANN_70	DB_2158, SD2W	2016 common garden	NA	NA
ANN1500	Helianthus annuus	annuus	ANN_70	DB_2158, SD2W	2016 common garden	NA	0.547563	0.547563
ANN1501	Helianthus annuus	annuus	ANN_71	DB_2168, SK1W	2016 common garden	L/L	0.636282	0.636282	4.79176	5.17577	1.4315	14.6042	3.62049	3.08293	27
ANN1502	Helianthus annuus	annuus	ANN_71	DB_2168, SK1W	2016 common garden	NA	0.701863	0.602484
ANN1503	Helianthus annuus	annuus	ANN_71	DB_2168, SK1W	2016 common garden	NA	NA	NA
ANN1504	Helianthus annuus	annuus	ANN_71	DB_2168, SK1W	2016 common garden	NA	0.523415	0.523415
ANN1505	Helianthus annuus	annuus	ANN_71	DB_2168, SK1W	2016 common garden	NA	0.508359	0.508359
ANN1506	Helianthus annuus	annuus	ANN_71	DB_2168, SK1W	2016 common garden	NA	0.616231	0.616231
ANN1507	Helianthus annuus	annuus	ANN_71	DB_2168, SK1W	2016 common garden	NA	0.569759	0.569759
ANN1508	Helianthus annuus	annuus	ANN_71	DB_2168, SK1W	2016 common garden	NA	0.580925	0.580925
ANN1509	Helianthus annuus	annuus	ANN_71	DB_2168, SK1W	2016 common garden	NA	0.503346	0.503346
ANN1510	Helianthus annuus	annuus	ANN_71	DB_2168, SK1W	2016 common garden	NA	NA	NA
1794-1	Helianthus annuus	annuus	DB_1794	ANN_01	2019 common garden	NA	0.782596	0.565192
1794-10	Helianthus annuus	annuus	DB_1794	ANN_01	2019 common garden	NA	0.891231	0.782461
1794-13	Helianthus annuus	annuus	DB_1794	ANN_01	2019 common garden	NA	0.725881	0.634508
1794-15	Helianthus annuus	annuus	DB_1794	ANN_01	2019 common garden	NA	0.878604	0.757207
1794-17	Helianthus annuus	annuus	DB_1794	ANN_01	2019 common garden	NA	0.846092	0.692183
1794-22	Helianthus annuus	annuus	DB_1794	ANN_01	2019 common garden	NA	0.901686	0.803372
1794-23	Helianthus annuus	annuus	DB_1794	ANN_01	2019 common garden	NA	1	1
1794-5	Helianthus annuus	annuus	DB_1794	ANN_01	2019 common garden	NA	0.668526	0.558034
1794-6	Helianthus annuus	annuus	DB_1794	ANN_01	2019 common garden	NA	1	1
1794-7	Helianthus annuus	annuus	DB_1794	ANN_01	2019 common garden	NA	0.63649	0.63649
1794-8	Helianthus annuus	annuus	DB_1794	ANN_01	2019 common garden	NA	0.540248	0.540248
1794-9	Helianthus annuus	annuus	DB_1794	ANN_01	2019 common garden	NA	0.678613	0.678613
1796-1	Helianthus annuus	annuus	DB_1796	ANN_02	2019 common garden	NA	0.740892	0.654522
1796-12	Helianthus annuus	annuus	DB_1796	ANN_02	2019 common garden	NA	0.873682	0.747364
1796-14	Helianthus annuus	annuus	DB_1796	ANN_02	2019 common garden	NA	0.82015	0.6403
1796-15	Helianthus annuus	annuus	DB_1796	ANN_02	2019 common garden	NA	0.808954	0.617909
1796-17	Helianthus annuus	annuus	DB_1796	ANN_02	2019 common garden	NA	0.800549	0.601099
1796-19	Helianthus annuus	annuus	DB_1796	ANN_02	2019 common garden	NA	0.491698	0.491698
1796-5	Helianthus annuus	annuus	DB_1796	ANN_02	2019 common garden	NA	0.621824	0.621824
1797-10	Helianthus annuus	annuus	DB_1797	ANN_03	2019 common garden	NA	0.946767	0.893534
1797-13	Helianthus annuus	annuus	DB_1797	ANN_03	2019 common garden	NA	0.929201	0.858402
1797-16	Helianthus annuus	annuus	DB_1797	ANN_03	2019 common garden	NA	0.871502	0.743004
1797-17	Helianthus annuus	annuus	DB_1797	ANN_03	2019 common garden	NA	1	1
1797-2	Helianthus annuus	annuus	DB_1797	ANN_03	2019 common garden	NA	1	1
1797-3	Helianthus annuus	annuus	DB_1797	ANN_03	2019 common garden	NA	1	1
1797-31	Helianthus annuus	annuus	DB_1797	ANN_03	2019 common garden	NA	0.88898	0.777961
1797-6	Helianthus annuus	annuus	DB_1797	ANN_03	2019 common garden	NA	1	1
1797-7	Helianthus annuus	annuus	DB_1797	ANN_03	2019 common garden	NA	1	1
1797-9	Helianthus annuus	annuus	DB_1797	ANN_03	2019 common garden	NA	0.859857	0.719715
1798-10	Helianthus annuus	annuus	DB_1798	ANN_04	2019 common garden	NA	0.600222	0.600222
1798-11	Helianthus annuus	annuus	DB_1798	ANN_04	2019 common garden	NA	0.751643	0.668857
1798-12	Helianthus annuus	annuus	DB_1798	ANN_04	2019 common garden	NA	0.800175	0.60035
1798-14	Helianthus annuus	annuus	DB_1798	ANN_04	2019 common garden	NA	0.855271	0.710542
1798-16	Helianthus annuus	annuus	DB_1798	ANN_04	2019 common garden	NA	0.899677	0.799354
1798-18	Helianthus annuus	annuus	DB_1798	ANN_04	2019 common garden	NA	0.850616	0.701233
1798-2	Helianthus annuus	annuus	DB_1798	ANN_04	2019 common garden	NA	0.599775	0.599775
1798-28	Helianthus annuus	annuus	DB_1798	ANN_04	2019 common garden	NA	0.858625	0.71725
1798-29	Helianthus annuus	annuus	DB_1798	ANN_04	2019 common garden	NA	0.799752	0.733003
1798-3	Helianthus annuus	annuus	DB_1798	ANN_04	2019 common garden	NA	0.724356	0.632475
1798-6	Helianthus annuus	annuus	DB_1798	ANN_04	2019 common garden	NA	0.931016	0.862032
1798-8	Helianthus annuus	annuus	DB_1798	ANN_04	2019 common garden	NA	0.745945	0.745945
1799-1	Helianthus annuus	annuus	DB_1799	ANN_05	2019 common garden	NA	0.636965	0.636965
1799-10	Helianthus annuus	annuus	DB_1799	ANN_05	2019 common garden	NA	0.825365	0.650729
1799-13	Helianthus annuus	annuus	DB_1799	ANN_05	2019 common garden	NA	0.653918	0.538557
1799-17	Helianthus annuus	annuus	DB_1799	ANN_05	2019 common garden	NA	0.650934	0.534579
1799-18	Helianthus annuus	annuus	DB_1799	ANN_05	2019 common garden	NA	0.686596	0.582128
1799-19	Helianthus annuus	annuus	DB_1799	ANN_05	2019 common garden	NA	0.548503	0.548503
1799-20	Helianthus annuus	annuus	DB_1799	ANN_05	2019 common garden	NA	0.804283	0.608566
1799-3	Helianthus annuus	annuus	DB_1799	ANN_05	2019 common garden	NA	0.831101	0.662201
1799-6	Helianthus annuus	annuus	DB_1799	ANN_05	2019 common garden	NA	0.716595	0.622127
1799-7	Helianthus annuus	annuus	DB_1799	ANN_05	2019 common garden	NA	0.646944	0.529259
1799-9	Helianthus annuus	annuus	DB_1799	ANN_05	2019 common garden	NA	0.844506	0.689013
1800-1	Helianthus annuus	annuus	DB_1800	ANN_06	2019 common garden	NA	0.673787	0.56505
1800-10	Helianthus annuus	annuus	DB_1800	ANN_06	2019 common garden	NA	0.820389	0.640778
1800-11	Helianthus annuus	annuus	DB_1800	ANN_06	2019 common garden	NA	0.65562	0.540827
1800-12	Helianthus annuus	annuus	DB_1800	ANN_06	2019 common garden	NA	0.653792	0.538389
1800-14	Helianthus annuus	annuus	DB_1800	ANN_06	2019 common garden	NA	0.624881	0.499841
1800-2	Helianthus annuus	annuus	DB_1800	ANN_06	2019 common garden	NA	0.864328	0.728656
1800-20	Helianthus annuus	annuus	DB_1800	ANN_06	2019 common garden	NA	0.770424	0.540849
1800-22	Helianthus annuus	annuus	DB_1800	ANN_06	2019 common garden	NA	1	1
1800-23	Helianthus annuus	annuus	DB_1800	ANN_06	2019 common garden	NA	0.761619	0.523238
1800-24	Helianthus annuus	annuus	DB_1800	ANN_06	2019 common garden	NA	0.80258	0.605159
1800-3	Helianthus annuus	annuus	DB_1800	ANN_06	2019 common garden	NA	0.681017	0.574689
1800-6	Helianthus annuus	annuus	DB_1800	ANN_06	2019 common garden	NA	0.67306	0.56408
1802-1	Helianthus annuus	annuus	DB_1802	ANN_07	2019 common garden	NA	0.700555	0.600741
1802-13	Helianthus annuus	annuus	DB_1802	ANN_07	2019 common garden	NA	1	1
1802-14	Helianthus annuus	annuus	DB_1802	ANN_07	2019 common garden	NA	0.499272	0.499272
1802-17	Helianthus annuus	annuus	DB_1802	ANN_07	2019 common garden	NA	0.988918	0.977837
1802-18	Helianthus annuus	annuus	DB_1802	ANN_07	2019 common garden	NA	1	1
1802-2	Helianthus annuus	annuus	DB_1802	ANN_07	2019 common garden	NA	1	1
1802-21	Helianthus annuus	annuus	DB_1802	ANN_07	2019 common garden	NA	0.838942	0.677885
1802-25	Helianthus annuus	annuus	DB_1802	ANN_07	2019 common garden	NA	1	1
1802-3	Helianthus annuus	annuus	DB_1802	ANN_07	2019 common garden	NA	0.506734	0.506734
1802-4	Helianthus annuus	annuus	DB_1802	ANN_07	2019 common garden	NA	1	1
1802-8	Helianthus annuus	annuus	DB_1802	ANN_07	2019 common garden	NA	0.685871	0.581161
1804-12	Helianthus annuus	annuus	DB_1804	ANN_09	2019 common garden	NA	0.820288	0.640577
1804-13	Helianthus annuus	annuus	DB_1804	ANN_09	2019 common garden	NA	1	1
1804-17	Helianthus annuus	annuus	DB_1804	ANN_09	2019 common garden	NA	1	1
1804-19	Helianthus annuus	annuus	DB_1804	ANN_09	2019 common garden	NA	1	1
1804-9	Helianthus annuus	annuus	DB_1804	ANN_09	2019 common garden	NA	1	1
1805-10	Helianthus annuus	annuus	DB_1805	ANN_10	2019 common garden	NA	1	1
1805-12	Helianthus annuus	annuus	DB_1805	ANN_10	2019 common garden	NA	1	1
1805-13	Helianthus annuus	annuus	DB_1805	ANN_10	2019 common garden	NA	1	1
1805-16	Helianthus annuus	annuus	DB_1805	ANN_10	2019 common garden	NA	1	1
1805-19	Helianthus annuus	annuus	DB_1805	ANN_10	2019 common garden	NA	1	1
1805-21	Helianthus annuus	annuus	DB_1805	ANN_10	2019 common garden	NA	1	1
1805-3	Helianthus annuus	annuus	DB_1805	ANN_10	2019 common garden	NA	1	1
1805-30	Helianthus annuus	annuus	DB_1805	ANN_10	2019 common garden	NA	1	1
1805-7	Helianthus annuus	annuus	DB_1805	ANN_10	2019 common garden	NA	1	1
1805-8	Helianthus annuus	annuus	DB_1805	ANN_10	2019 common garden	NA	1	1
1805-9	Helianthus annuus	annuus	DB_1805	ANN_10	2019 common garden	NA	0.853112	0.706223
1806-1	Helianthus annuus	annuus	DB_1806	ANN_11	2019 common garden	NA	1	1
1806-11	Helianthus annuus	annuus	DB_1806	ANN_11	2019 common garden	NA	0.894134	0.788269
1806-12	Helianthus annuus	annuus	DB_1806	ANN_11	2019 common garden	NA	0.835965	0.671931
1806-13	Helianthus annuus	annuus	DB_1806	ANN_11	2019 common garden	NA	0.667954	0.667954
1806-14	Helianthus annuus	annuus	DB_1806	ANN_11	2019 common garden	NA	1	1
1806-15	Helianthus annuus	annuus	DB_1806	ANN_11	2019 common garden	NA	0.897552	0.795104
1806-23	Helianthus annuus	annuus	DB_1806	ANN_11	2019 common garden	NA	0.865024	0.730048
1806-26	Helianthus annuus	annuus	DB_1806	ANN_11	2019 common garden	NA	1	1
1806-27	Helianthus annuus	annuus	DB_1806	ANN_11	2019 common garden	NA	0.827181	0.654361
1806-6	Helianthus annuus	annuus	DB_1806	ANN_11	2019 common garden	NA	0.864172	0.728344
1807-12	Helianthus annuus	annuus	DB_1807	ANN_12	2019 common garden	NA	0.490379	0.490379
1807-15	Helianthus annuus	annuus	DB_1807	ANN_12	2019 common garden	NA	0.810363	0.620726
1807-17	Helianthus annuus	annuus	DB_1807	ANN_12	2019 common garden	NA	0.628079	0.628079
1807-19	Helianthus annuus	annuus	DB_1807	ANN_12	2019 common garden	NA	1	1
1807-2	Helianthus annuus	annuus	DB_1807	ANN_12	2019 common garden	NA	0.690325	0.690325
1807-22	Helianthus annuus	annuus	DB_1807	ANN_12	2019 common garden	NA	0.710654	0.614205
1807-25	Helianthus annuus	annuus	DB_1807	ANN_12	2019 common garden	NA	0.529238	0.529238
1807-3	Helianthus annuus	annuus	DB_1807	ANN_12	2019 common garden	NA	0.454468	0.454468
1807-4	Helianthus annuus	annuus	DB_1807	ANN_12	2019 common garden	NA	0.660194	0.546925
1807-5	Helianthus annuus	annuus	DB_1807	ANN_12	2019 common garden	NA	1	1
1807-6	Helianthus annuus	annuus	DB_1807	ANN_12	2019 common garden	NA	0.714843	0.61979
1807-7	Helianthus annuus	annuus	DB_1807	ANN_12	2019 common garden	NA	0.560534	0.560534
1815-1	Helianthus annuus	annuus	DB_1815	ANN_15	2019 common garden	NA	0.908106	0.816213
1815-12	Helianthus annuus	annuus	DB_1815	ANN_15	2019 common garden	NA	1	1
1815-15	Helianthus annuus	annuus	DB_1815	ANN_15	2019 common garden	NA	1	1
1815-2	Helianthus annuus	annuus	DB_1815	ANN_15	2019 common garden	NA	0.946446	0.892891
1815-22	Helianthus annuus	annuus	DB_1815	ANN_15	2019 common garden	NA	1	1
1815-25	Helianthus annuus	annuus	DB_1815	ANN_15	2019 common garden	NA	0.94108	0.88216
1815-3	Helianthus annuus	annuus	DB_1815	ANN_15	2019 common garden	NA	1	1
1815-30	Helianthus annuus	annuus	DB_1815	ANN_15	2019 common garden	NA	1	1
1815-7	Helianthus annuus	annuus	DB_1815	ANN_15	2019 common garden	NA	0.821554	0.643109
1815-8	Helianthus annuus	annuus	DB_1815	ANN_15	2019 common garden	NA	0.814024	0.628049
1815-9	Helianthus annuus	annuus	DB_1815	ANN_15	2019 common garden	NA	0.870235	0.74047
1817-1	Helianthus annuus	annuus	DB_1817	ANN_16	2019 common garden	NA	1	1
1817-12	Helianthus annuus	annuus	DB_1817	ANN_16	2019 common garden	NA	1	1
1817-14	Helianthus annuus	annuus	DB_1817	ANN_16	2019 common garden	NA	0.816319	0.632638
1817-17	Helianthus annuus	annuus	DB_1817	ANN_16	2019 common garden	NA	0.951283	0.902566
1817-2	Helianthus annuus	annuus	DB_1817	ANN_16	2019 common garden	NA	1	1
1817-21	Helianthus annuus	annuus	DB_1817	ANN_16	2019 common garden	NA	0.87172	0.74344
1817-26	Helianthus annuus	annuus	DB_1817	ANN_16	2019 common garden	NA	0.948127	0.896253
1817-28	Helianthus annuus	annuus	DB_1817	ANN_16	2019 common garden	NA	1	1
1817-7	Helianthus annuus	annuus	DB_1817	ANN_16	2019 common garden	NA	1	1
1817-8	Helianthus annuus	annuus	DB_1817	ANN_16	2019 common garden	NA	1	1
1818-12	Helianthus annuus	annuus	DB_1818	ANN_17	2019 common garden	NA	1	1
1818-14	Helianthus annuus	annuus	DB_1818	ANN_17	2019 common garden	NA	0.682056	0.576075
1818-15	Helianthus annuus	annuus	DB_1818	ANN_17	2019 common garden	NA	0.911936	0.823873
1818-18	Helianthus annuus	annuus	DB_1818	ANN_17	2019 common garden	NA	0.764656	0.686207
1818-2	Helianthus annuus	annuus	DB_1818	ANN_17	2019 common garden	NA	0.890504	0.781007
1818-22	Helianthus annuus	annuus	DB_1818	ANN_17	2019 common garden	NA	0.882934	0.765868
1818-24	Helianthus annuus	annuus	DB_1818	ANN_17	2019 common garden	NA	1	1
1818-27	Helianthus annuus	annuus	DB_1818	ANN_17	2019 common garden	NA	1	1
1818-3	Helianthus annuus	annuus	DB_1818	ANN_17	2019 common garden	NA	1	1
1818-4	Helianthus annuus	annuus	DB_1818	ANN_17	2019 common garden	NA	0.923959	0.847917
1818-7	Helianthus annuus	annuus	DB_1818	ANN_17	2019 common garden	NA	0.916765	0.833531
1820-13	Helianthus annuus	annuus	DB_1820	ANN_18	2019 common garden	NA	1	1
1820-16	Helianthus annuus	annuus	DB_1820	ANN_18	2019 common garden	NA	0.799025	0.732033
1820-18	Helianthus annuus	annuus	DB_1820	ANN_18	2019 common garden	NA	1	1
1820-2	Helianthus annuus	annuus	DB_1820	ANN_18	2019 common garden	NA	1	1
1820-26	Helianthus annuus	annuus	DB_1820	ANN_18	2019 common garden	NA	0.872153	0.744307
1820-6	Helianthus annuus	annuus	DB_1820	ANN_18	2019 common garden	NA	0.73002	0.640027
1820-7	Helianthus annuus	annuus	DB_1820	ANN_18	2019 common garden	NA	1	1
1820-8	Helianthus annuus	annuus	DB_1820	ANN_18	2019 common garden	NA	1	1
1822-10	Helianthus annuus	annuus	DB_1822	ANN_19	2019 common garden	NA	1	1
1822-14	Helianthus annuus	annuus	DB_1822	ANN_19	2019 common garden	NA	1	1
1822-15	Helianthus annuus	annuus	DB_1822	ANN_19	2019 common garden	NA	1	1
1822-17	Helianthus annuus	annuus	DB_1822	ANN_19	2019 common garden	NA	1	1
1822-18	Helianthus annuus	annuus	DB_1822	ANN_19	2019 common garden	NA	1	1
1822-23	Helianthus annuus	annuus	DB_1822	ANN_19	2019 common garden	NA	1	1
1822-25	Helianthus annuus	annuus	DB_1822	ANN_19	2019 common garden	NA	1	1
1822-28	Helianthus annuus	annuus	DB_1822	ANN_19	2019 common garden	NA	1	1
1822-5	Helianthus annuus	annuus	DB_1822	ANN_19	2019 common garden	NA	1	1
1822-9	Helianthus annuus	annuus	DB_1822	ANN_19	2019 common garden	NA	1	1
1827-12	Helianthus annuus	annuus	DB_1827	ANN_20	2019 common garden	NA	0.800081	0.733441
1827-14	Helianthus annuus	annuus	DB_1827	ANN_20	2019 common garden	NA	1	1
1827-15	Helianthus annuus	annuus	DB_1827	ANN_20	2019 common garden	NA	1	1
1827-16	Helianthus annuus	annuus	DB_1827	ANN_20	2019 common garden	NA	1	1
1827-17	Helianthus annuus	annuus	DB_1827	ANN_20	2019 common garden	NA	0.897062	0.794123
1827-19	Helianthus annuus	annuus	DB_1827	ANN_20	2019 common garden	NA	1	1
1827-6	Helianthus annuus	annuus	DB_1827	ANN_20	2019 common garden	NA	0.67467	0.67467
1827-2	Helianthus annuus	annuus	DB_1827	ANN_20	2019 common garden	NA	0.927397	0.854794
1827-21	Helianthus annuus	annuus	DB_1827	ANN_20	2019 common garden	NA	0.874863	0.833151
1827-22	Helianthus annuus	annuus	DB_1827	ANN_20	2019 common garden	NA	0.870689	0.741378
1827-3	Helianthus annuus	annuus	DB_1827	ANN_20	2019 common garden	NA	0.842996	0.685992
1827-9	Helianthus annuus	annuus	DB_1827	ANN_20	2019 common garden	NA	1	1
1828-1	Helianthus annuus	annuus	DB_1828	ANN_21	2019 common garden	NA	0.841999	0.683998
1828-11	Helianthus annuus	annuus	DB_1828	ANN_21	2019 common garden	NA	0.798068	0.596137
1828-13	Helianthus annuus	annuus	DB_1828	ANN_21	2019 common garden	NA	0.740959	0.654612
1828-14	Helianthus annuus	annuus	DB_1828	ANN_21	2019 common garden	NA	0.719506	0.626008
1828-15	Helianthus annuus	annuus	DB_1828	ANN_21	2019 common garden	NA	0.658122	0.544163
1828-18	Helianthus annuus	annuus	DB_1828	ANN_21	2019 common garden	NA	0.813508	0.627016
1828-2	Helianthus annuus	annuus	DB_1828	ANN_21	2019 common garden	NA	0.635861	0.635861
1828-23	Helianthus annuus	annuus	DB_1828	ANN_21	2019 common garden	NA	0.478082	0.478082
1828-26	Helianthus annuus	annuus	DB_1828	ANN_21	2019 common garden	NA	0.698416	0.597888
1828-29	Helianthus annuus	annuus	DB_1828	ANN_21	2019 common garden	NA	0.832998	0.665995
1828-4	Helianthus annuus	annuus	DB_1828	ANN_21	2019 common garden	NA	0.581435	0.581435
1828-8	Helianthus annuus	annuus	DB_1828	ANN_21	2019 common garden	NA	0.632589	0.632589
1830-1	Helianthus annuus	annuus	DB_1830	ANN_23	2019 common garden	NA	0.862574	0.725149
1830-10	Helianthus annuus	annuus	DB_1830	ANN_23	2019 common garden	NA	0.555956	0.555956
1830-11	Helianthus annuus	annuus	DB_1830	ANN_23	2019 common garden	NA	0.628252	0.504336
1830-17	Helianthus annuus	annuus	DB_1830	ANN_23	2019 common garden	NA	1
1830-2	Helianthus annuus	annuus	DB_1830	ANN_23	2019 common garden	NA	0.587804	0.587804
1830-20	Helianthus annuus	annuus	DB_1830	ANN_23	2019 common garden	NA	0.89033	0.780659
1830-25	Helianthus annuus	annuus	DB_1830	ANN_23	2019 common garden	NA	0.665747	0.665747
1830-27	Helianthus annuus	annuus	DB_1830	ANN_23	2019 common garden	NA	0.805915	0.61183
1830-4	Helianthus annuus	annuus	DB_1830	ANN_23	2019 common garden	NA	0.552889	0.552889
1830-5	Helianthus annuus	annuus	DB_1830	ANN_23	2019 common garden	NA	0.731728	0.642304
1830-7	Helianthus annuus	annuus	DB_1830	ANN_23	2019 common garden	NA	0.51826	0.51826
1830-9	Helianthus annuus	annuus	DB_1830	ANN_23	2019 common garden	NA	0.586606	0.586606
1831-11	Helianthus annuus	annuus	DB_1831	ANN_24	2019 common garden	NA	1	1
1831-13	Helianthus annuus	annuus	DB_1831	ANN_24	2019 common garden	NA	1	1
1831-14	Helianthus annuus	annuus	DB_1831	ANN_24	2019 common garden	NA	0.932551	0.865102
1831-16	Helianthus annuus	annuus	DB_1831	ANN_24	2019 common garden	NA	0.610139	0.610139
1831-17	Helianthus annuus	annuus	DB_1831	ANN_24	2019 common garden	NA	0.870655	0.74131
1831-22	Helianthus annuus	annuus	DB_1831	ANN_24	2019 common garden	NA	0.608881	0.608881
1831-24	Helianthus annuus	annuus	DB_1831	ANN_24	2019 common garden	NA	0.907884	0.815767
1831-25	Helianthus annuus	annuus	DB_1831	ANN_24	2019 common garden	NA	0.619566	0.619566
1831-3	Helianthus annuus	annuus	DB_1831	ANN_24	2019 common garden	NA	0.916232	0.832464
1831-6	Helianthus annuus	annuus	DB_1831	ANN_24	2019 common garden	NA	0.618541	0.618541
1831-8	Helianthus annuus	annuus	DB_1831	ANN_24	2019 common garden	NA	0.884363	0.768726
1831-9	Helianthus annuus	annuus	DB_1831	ANN_24	2019 common garden	NA	0.818209	0.757611
1838-14	Helianthus annuus	annuus	DB_1838	ANN_25	2019 common garden	NA	0.649699	0.532932
1838-16	Helianthus annuus	annuus	DB_1838	ANN_25	2019 common garden	NA	0.538611	0.538611
1838-21	Helianthus annuus	annuus	DB_1838	ANN_25	2019 common garden	NA	0.672556	0.563408
1838-24	Helianthus annuus	annuus	DB_1838	ANN_25	2019 common garden	NA	0.806252	0.741669
1838-27	Helianthus annuus	annuus	DB_1838	ANN_25	2019 common garden	NA	0.406833	0.406833
1838-4	Helianthus annuus	annuus	DB_1838	ANN_25	2019 common garden	NA	0.72425	0.632334
1838-5	Helianthus annuus	annuus	DB_1838	ANN_25	2019 common garden	NA	1	1
1838-9	Helianthus annuus	annuus	DB_1838	ANN_25	2019 common garden	NA	0.824098	0.648196
1839-1	Helianthus annuus	annuus	DB_1839	ANN_26	2019 common garden	NA	0.440628	0.440628
1839-16	Helianthus annuus	annuus	DB_1839	ANN_26	2019 common garden	NA	0.461226	0.461226
1839-23	Helianthus annuus	annuus	DB_1839	ANN_26	2019 common garden	NA	0.551291	0.551291
1839-25	Helianthus annuus	annuus	DB_1839	ANN_26	2019 common garden	NA	0.452053	0.452053
1839-4	Helianthus annuus	annuus	DB_1839	ANN_26	2019 common garden	NA	0.530899	0.530899
1839-9	Helianthus annuus	annuus	DB_1839	ANN_26	2019 common garden	NA	0.41656	0.41656
1841-1	Helianthus annuus	annuus	DB_1841	ANN_27	2019 common garden	NA	0.746529	0.493058
1841-11	Helianthus annuus	annuus	DB_1841	ANN_27	2019 common garden	NA	0.841573	0.683146
1841-12	Helianthus annuus	annuus	DB_1841	ANN_27	2019 common garden	NA	1	1
1841-14	Helianthus annuus	annuus	DB_1841	ANN_27	2019 common garden	NA	1	1
1841-2	Helianthus annuus	annuus	DB_1841	ANN_27	2019 common garden	NA	0.941101	0.882203
1841-20	Helianthus annuus	annuus	DB_1841	ANN_27	2019 common garden	NA	1	1
1841-22	Helianthus annuus	annuus	DB_1841	ANN_27	2019 common garden	NA	0.679993	0.573324
1841-26	Helianthus annuus	annuus	DB_1841	ANN_27	2019 common garden	NA	1	1
1841-6	Helianthus annuus	annuus	DB_1841	ANN_27	2019 common garden	NA	0.629814	0.629814
1841-7	Helianthus annuus	annuus	DB_1841	ANN_27	2019 common garden	NA	0.876787	0.835715
1841-9	Helianthus annuus	annuus	DB_1841	ANN_27	2019 common garden	NA	0.751142	0.66819
1844-1	Helianthus annuus	annuus	DB_1844	ANN_29	2019 common garden	NA	0.715804	0.621072
1844-13	Helianthus annuus	annuus	DB_1844	ANN_29	2019 common garden	NA	0.824283	0.648566
1844-14	Helianthus annuus	annuus	DB_1844	ANN_29	2019 common garden	NA	0.762636	0.525272
1844-15	Helianthus annuus	annuus	DB_1844	ANN_29	2019 common garden	NA	0.630781	0.630781
1844-17	Helianthus annuus	annuus	DB_1844	ANN_29	2019 common garden	NA	1	1
1844-18	Helianthus annuus	annuus	DB_1844	ANN_29	2019 common garden	NA	0.641191	0.521589
1844-4	Helianthus annuus	annuus	DB_1844	ANN_29	2019 common garden	NA	0.777547	0.555093
1844-5	Helianthus annuus	annuus	DB_1844	ANN_29	2019 common garden	NA	0.669673	0.559564
1844-6	Helianthus annuus	annuus	DB_1844	ANN_29	2019 common garden	NA	0.916274	0.832548
1844-7	Helianthus annuus	annuus	DB_1844	ANN_29	2019 common garden	NA	0.824571	0.649142
1846-1	Helianthus annuus	annuus	DB_1846	ANN_31	2019 common garden	NA	0.816812	0.633625
1846-13	Helianthus annuus	annuus	DB_1846	ANN_31	2019 common garden	NA	0.96576	0.93152
1846-14	Helianthus annuus	annuus	DB_1846	ANN_31	2019 common garden	NA	0.494827	0.494827
1846-16	Helianthus annuus	annuus	DB_1846	ANN_31	2019 common garden	NA	0.640464	0.520619
1846-19	Helianthus annuus	annuus	DB_1846	ANN_31	2019 common garden	NA	0.475591	0.475591
1846-25	Helianthus annuus	annuus	DB_1846	ANN_31	2019 common garden	NA	0.869292	0.738585
1846-26	Helianthus annuus	annuus	DB_1846	ANN_31	2019 common garden	NA	1	1
1846-29	Helianthus annuus	annuus	DB_1846	ANN_31	2019 common garden	NA	0.666398	0.555198
1846-3	Helianthus annuus	annuus	DB_1846	ANN_31	2019 common garden	NA	0.708893	0.611858
1846-4	Helianthus annuus	annuus	DB_1846	ANN_31	2019 common garden	NA	0.87286	0.74572
1846-9	Helianthus annuus	annuus	DB_1846	ANN_31	2019 common garden	NA	0.788923	0.577846
1847-12	Helianthus annuus	annuus	DB_1847	ANN_32	2019 common garden	NA	1	1
1847-16	Helianthus annuus	annuus	DB_1847	ANN_32	2019 common garden	NA	1	1
1847-30	Helianthus annuus	annuus	DB_1847	ANN_32	2019 common garden	NA	0.834608	0.669216
1847-4	Helianthus annuus	annuus	DB_1847	ANN_32	2019 common garden	NA	1	1
1847-9	Helianthus annuus	annuus	DB_1847	ANN_32	2019 common garden	NA	1	1
1849-10	Helianthus annuus	annuus	DB_1849	ANN_34	2019 common garden	NA	0.828487	0.656975
1849-13	Helianthus annuus	annuus	DB_1849	ANN_34	2019 common garden	NA	0.484734	0.484734
1849-14	Helianthus annuus	annuus	DB_1849	ANN_34	2019 common garden	NA	0.885019	0.770038
1849-17	Helianthus annuus	annuus	DB_1849	ANN_34	2019 common garden	NA	0.386818	0.386818
1849-2	Helianthus annuus	annuus	DB_1849	ANN_34	2019 common garden	NA	0.54053	0.54053
1849-23	Helianthus annuus	annuus	DB_1849	ANN_34	2019 common garden	NA	0.729242	0.63899
1849-25	Helianthus annuus	annuus	DB_1849	ANN_34	2019 common garden	NA	0.819082	0.638165
1849-4	Helianthus annuus	annuus	DB_1849	ANN_34	2019 common garden	NA	0.818735	0.63747
1849-6	Helianthus annuus	annuus	DB_1849	ANN_34	2019 common garden	NA	0.532676	0.532676
1852-1	Helianthus annuus	annuus	DB_1852	ANN_36	2019 common garden	NA	0.840224	0.680448
1852-11	Helianthus annuus	annuus	DB_1852	ANN_36	2019 common garden	NA	0.853621	0.707242
1852-12	Helianthus annuus	annuus	DB_1852	ANN_36	2019 common garden	NA	0.84644	0.69288
1852-13	Helianthus annuus	annuus	DB_1852	ANN_36	2019 common garden	NA	0.825825	0.651649
1852-16	Helianthus annuus	annuus	DB_1852	ANN_36	2019 common garden	NA	0.865782	0.731565
1852-19	Helianthus annuus	annuus	DB_1852	ANN_36	2019 common garden	NA	0.762693	0.525386
1852-2	Helianthus annuus	annuus	DB_1852	ANN_36	2019 common garden	NA	0.854669	0.709338
1852-27	Helianthus annuus	annuus	DB_1852	ANN_36	2019 common garden	NA	0.78201	0.56402
1852-3	Helianthus annuus	annuus	DB_1852	ANN_36	2019 common garden	NA	0.728041	0.637388
1852-30	Helianthus annuus	annuus	DB_1852	ANN_36	2019 common garden	NA	0.635087	0.635087
1852-4	Helianthus annuus	annuus	DB_1852	ANN_36	2019 common garden	NA	0.632737	0.510317
1852-5	Helianthus annuus	annuus	DB_1852	ANN_36	2019 common garden	NA	0.610813	0.610813
1852-8	Helianthus annuus	annuus	DB_1852	ANN_36	2019 common garden	NA	0.886698	0.773395
1854-10	Helianthus annuus	annuus	DB_1854	ANN_37	2019 common garden	NA	0.780167	0.560334
1854-11	Helianthus annuus	annuus	DB_1854	ANN_37	2019 common garden	NA	0.851815	0.70363
1854-14	Helianthus annuus	annuus	DB_1854	ANN_37	2019 common garden	NA	0.789249	0.578498
1854-18	Helianthus annuus	annuus	DB_1854	ANN_37	2019 common garden	NA	0.985313	0.970627
1854-20	Helianthus annuus	annuus	DB_1854	ANN_37	2019 common garden	NA	0.825145	0.76686
1854-23	Helianthus annuus	annuus	DB_1854	ANN_37	2019 common garden	NA	0.647651	0.647651
1854-25	Helianthus annuus	annuus	DB_1854	ANN_37	2019 common garden	NA	0.935513	0.871026
1854-27	Helianthus annuus	annuus	DB_1854	ANN_37	2019 common garden	NA	0.929868	0.859736
1854-4	Helianthus annuus	annuus	DB_1854	ANN_37	2019 common garden	NA	0.684373	0.684373
1861-16	Helianthus annuus	annuus	DB_1861	ANN_38	2019 common garden	NA	1	1
1861-18	Helianthus annuus	annuus	DB_1861	ANN_38	2019 common garden	NA	0.904335	0.80867
1861-22	Helianthus annuus	annuus	DB_1861	ANN_38	2019 common garden	NA	0.811769	0.623539
1861-6	Helianthus annuus	annuus	DB_1861	ANN_38	2019 common garden	NA	0.825909	0.651819
1861-7	Helianthus annuus	annuus	DB_1861	ANN_38	2019 common garden	NA	0.411555	0.411555
1861-9	Helianthus annuus	annuus	DB_1861	ANN_38	2019 common garden	NA	0.512771	0.512771
1864-1	Helianthus annuus	annuus	DB_1864	ANN_39	2019 common garden	NA	0.605413	0.473884
1864-10	Helianthus annuus	annuus	DB_1864	ANN_39	2019 common garden	NA	0.650706	0.534275
1864-13	Helianthus annuus	annuus	DB_1864	ANN_39	2019 common garden	NA	0.382753	0.382753
1864-16	Helianthus annuus	annuus	DB_1864	ANN_39	2019 common garden	NA	0.455115	0.455115
1864-25	Helianthus annuus	annuus	DB_1864	ANN_39	2019 common garden	NA	0.40618	0.40618
1864-4	Helianthus annuus	annuus	DB_1864	ANN_39	2019 common garden	NA	0.386988	0.386988
1864-6	Helianthus annuus	annuus	DB_1864	ANN_39	2019 common garden	NA	0.755138	0.510275
1864-7	Helianthus annuus	annuus	DB_1864	ANN_39	2019 common garden	NA	0.480646	0.480646
1864-8	Helianthus annuus	annuus	DB_1864	ANN_39	2019 common garden	NA	0.473983	0.473983
1866-11	Helianthus annuus	annuus	DB_1866	ANN_40	2019 common garden	NA	0.717946	0.623928
1866-17	Helianthus annuus	annuus	DB_1866	ANN_40	2019 common garden	NA	0.520593	0.520593
1866-18	Helianthus annuus	annuus	DB_1866	ANN_40	2019 common garden	NA	0.49187	0.49187
1866-19	Helianthus annuus	annuus	DB_1866	ANN_40	2019 common garden	NA	0.526179	0.526179
1866-22	Helianthus annuus	annuus	DB_1866	ANN_40	2019 common garden	NA	0.52937	0.52937
1866-26	Helianthus annuus	annuus	DB_1866	ANN_40	2019 common garden	NA	0.551838	0.551838
1866-3	Helianthus annuus	annuus	DB_1866	ANN_40	2019 common garden	NA	0.596529	0.596529
1866-5	Helianthus annuus	annuus	DB_1866	ANN_40	2019 common garden	NA	0.507782	0.507782
1871-2	Helianthus annuus	annuus	DB_1871	ANN_41	2019 common garden	NA	0.890075	0.78015
1871-21	Helianthus annuus	annuus	DB_1871	ANN_41	2019 common garden	NA	0.483253	0.483253
1871-25	Helianthus annuus	annuus	DB_1871	ANN_41	2019 common garden	NA	0.463065	0.463065
1871-7	Helianthus annuus	annuus	DB_1871	ANN_41	2019 common garden	NA	0.740653	0.481305
1875-1	Helianthus annuus	annuus	DB_1875	ANN_42	2019 common garden	NA	0.374511	0.374511
1875-11	Helianthus annuus	annuus	DB_1875	ANN_42	2019 common garden	NA	0.426251	0.426251
1875-12	Helianthus annuus	annuus	DB_1875	ANN_42	2019 common garden	NA	0.728383	0.456767
1875-14	Helianthus annuus	annuus	DB_1875	ANN_42	2019 common garden	NA	0.486608	0.486608
1875-15	Helianthus annuus	annuus	DB_1875	ANN_42	2019 common garden	NA	0.468062	0.468062
1875-19	Helianthus annuus	annuus	DB_1875	ANN_42	2019 common garden	NA	0.399504	0.399504
1875-20	Helianthus annuus	annuus	DB_1875	ANN_42	2019 common garden	NA	0.547328	0.547328
1875-21	Helianthus annuus	annuus	DB_1875	ANN_42	2019 common garden	NA	0.392155	0.392155
1875-23	Helianthus annuus	annuus	DB_1875	ANN_42	2019 common garden	NA	0.427542	0.427542
1875-27	Helianthus annuus	annuus	DB_1875	ANN_42	2019 common garden	NA	0.466849	0.466849
1875-29	Helianthus annuus	annuus	DB_1875	ANN_42	2019 common garden	NA	0.342305	0.342305
1876-1	Helianthus annuus	texanus	DB_1876	ANN_43	2019 common garden	NA	0.31269	0.31269
1876-13	Helianthus annuus	texanus	DB_1876	ANN_43	2019 common garden	NA	0.2668	0.2668
1876-15	Helianthus annuus	texanus	DB_1876	ANN_43	2019 common garden	NA	0.264679	0.264679
1876-16	Helianthus annuus	texanus	DB_1876	ANN_43	2019 common garden	NA	0.283662	0.283662
1876-17	Helianthus annuus	texanus	DB_1876	ANN_43	2019 common garden	NA	0.116628	0.116628
1876-19	Helianthus annuus	texanus	DB_1876	ANN_43	2019 common garden	NA	0.361481	0.361481
1876-20	Helianthus annuus	texanus	DB_1876	ANN_43	2019 common garden	NA	0.162262	0.162262
1876-24	Helianthus annuus	texanus	DB_1876	ANN_43	2019 common garden	NA	0.202178	0.202178
1876-25	Helianthus annuus	texanus	DB_1876	ANN_43	2019 common garden	NA	0.317922	0.317922
1876-28	Helianthus annuus	texanus	DB_1876	ANN_43	2019 common garden	NA	0.251428	0.251428
1880-10	Helianthus annuus	texanus	DB_1880	ANN_44	2019 common garden	NA	0.227338	0.227338
1880-12	Helianthus annuus	texanus	DB_1880	ANN_44	2019 common garden	NA	0.17279	0.17279
1880-13	Helianthus annuus	texanus	DB_1880	ANN_44	2019 common garden	NA	0.177563	0.177563
1880-14	Helianthus annuus	texanus	DB_1880	ANN_44	2019 common garden	NA	0.207494	0.207494
1880-16	Helianthus annuus	texanus	DB_1880	ANN_44	2019 common garden	NA	0.207417	0.207417
1880-17	Helianthus annuus	texanus	DB_1880	ANN_44	2019 common garden	NA	0.195392	0.195392
1880-2	Helianthus annuus	texanus	DB_1880	ANN_44	2019 common garden	NA	0.203348	0.203348
1880-23	Helianthus annuus	texanus	DB_1880	ANN_44	2019 common garden	NA	0.225453	0.225453
1880-26	Helianthus annuus	texanus	DB_1880	ANN_44	2019 common garden	NA	0.194741	0.194741
1880-3	Helianthus annuus	texanus	DB_1880	ANN_44	2019 common garden	NA	0.295187	0.295187
1880-7	Helianthus annuus	texanus	DB_1880	ANN_44	2019 common garden	NA	0.269831	0.269831
1880-9	Helianthus annuus	texanus	DB_1880	ANN_44	2019 common garden	NA	0.199986	0.199986
1881-1	Helianthus annuus	texanus	DB_1881	ANN_45	2019 common garden	NA	0.301646	0.301646
1881-10	Helianthus annuus	texanus	DB_1881	ANN_45	2019 common garden	NA	0.307575	0.307575
1881-11	Helianthus annuus	texanus	DB_1881	ANN_45	2019 common garden	NA	0.146725	0.146725
1881-13	Helianthus annuus	texanus	DB_1881	ANN_45	2019 common garden	NA	0.236518	0.236518
1881-15	Helianthus annuus	texanus	DB_1881	ANN_45	2019 common garden	NA	0.218319	0.218319
1881-17	Helianthus annuus	texanus	DB_1881	ANN_45	2019 common garden	NA	0.247646	0.247646
1881-22	Helianthus annuus	texanus	DB_1881	ANN_45	2019 common garden	NA	0.22189	0.22189
1881-24	Helianthus annuus	texanus	DB_1881	ANN_45	2019 common garden	NA	0.261051	0.261051
1881-26	Helianthus annuus	texanus	DB_1881	ANN_45	2019 common garden	NA	0.308733	0.308733
1881-30	Helianthus annuus	texanus	DB_1881	ANN_45	2019 common garden	NA	0.196858	0.196858
1881-8	Helianthus annuus	texanus	DB_1881	ANN_45	2019 common garden	NA	0.281417	0.281417
1881-9	Helianthus annuus	texanus	DB_1881	ANN_45	2019 common garden	NA	0.207086	0.207086
1883-1	Helianthus annuus	texanus	DB_1883	1883	2019 common garden	NA	0.104355	0.104355
1883-10	Helianthus annuus	texanus	DB_1883	1883	2019 common garden	NA	0.155793	0.155793
1883-12	Helianthus annuus	texanus	DB_1883	1883	2019 common garden	NA	0.174144	0.174144
1883-14	Helianthus annuus	texanus	DB_1883	1883	2019 common garden	NA	0.2448	0.2448
1883-15	Helianthus annuus	texanus	DB_1883	1883	2019 common garden	NA	0.189138	0.189138
1883-3	Helianthus annuus	texanus	DB_1883	1883	2019 common garden	NA	0.265692	0.265692
1883-4	Helianthus annuus	texanus	DB_1883	1883	2019 common garden	NA	0.193693	0.193693
1883-5	Helianthus annuus	texanus	DB_1883	1883	2019 common garden	NA	0.234146	0.234146
1883-8	Helianthus annuus	texanus	DB_1883	1883	2019 common garden	NA	0.146718	0.146718
1883-9	Helianthus annuus	texanus	DB_1883	1883	2019 common garden	NA	0.24089	0.24089
1890-11	Helianthus annuus	texanus	DB_1890	1890	2019 common garden	NA	0.143199	0.143199
1890-13	Helianthus annuus	texanus	DB_1890	1890	2019 common garden	NA	0.191179	0.191179
1890-14	Helianthus annuus	texanus	DB_1890	1890	2019 common garden	NA	0.11897	0.11897
1890-3	Helianthus annuus	texanus	DB_1890	1890	2019 common garden	NA	0.176093	0.176093
1890-4	Helianthus annuus	texanus	DB_1890	1890	2019 common garden	NA	0.0986735	0.0986735
1890-5	Helianthus annuus	texanus	DB_1890	1890	2019 common garden	NA	0.103454	0.103454
1890-6	Helianthus annuus	texanus	DB_1890	1890	2019 common garden	NA	0.224173	0.224173
1890-8	Helianthus annuus	texanus	DB_1890	1890	2019 common garden	NA	0.156668	0.156668
1893-1	Helianthus annuus	texanus	DB_1893	1893	2019 common garden	NA	0.277961	0.277961
1893-12	Helianthus annuus	texanus	DB_1893	1893	2019 common garden	NA	0.257692	0.257692
1893-13	Helianthus annuus	texanus	DB_1893	1893	2019 common garden	NA	0.313491	0.313491
1893-14	Helianthus annuus	texanus	DB_1893	1893	2019 common garden	NA	0.339205	0.339205
1893-15	Helianthus annuus	texanus	DB_1893	1893	2019 common garden	NA	0.313647	0.313647
1893-2	Helianthus annuus	texanus	DB_1893	1893	2019 common garden	NA	0.229668	0.229668
1893-3	Helianthus annuus	texanus	DB_1893	1893	2019 common garden	NA	0.237367	0.237367
1893-4	Helianthus annuus	texanus	DB_1893	1893	2019 common garden	NA	0.332046	0.332046
1893-6	Helianthus annuus	texanus	DB_1893	1893	2019 common garden	NA	0.164058	0.164058
1893-7	Helianthus annuus	texanus	DB_1893	1893	2019 common garden	NA	0.225021	0.225021
1893-8	Helianthus annuus	texanus	DB_1893	1893	2019 common garden	NA	0.266021	0.266021
1893-9	Helianthus annuus	texanus	DB_1893	1893	2019 common garden	NA	0.288786	0.288786
1895-1	Helianthus annuus	annuus	DB_1895	1895	2019 common garden	NA	0.755492	0.510983
1895-10	Helianthus annuus	annuus	DB_1895	1895	2019 common garden	NA	0.894584	0.789169
1895-11	Helianthus annuus	annuus	DB_1895	1895	2019 common garden	NA	0.885898	0.771797
1895-2	Helianthus annuus	annuus	DB_1895	1895	2019 common garden	NA	0.735141	0.646855
1895-3	Helianthus annuus	annuus	DB_1895	1895	2019 common garden	NA	0.707426	0.609901
1895-4	Helianthus annuus	annuus	DB_1895	1895	2019 common garden	NA	0.697556	0.697556
1895-6	Helianthus annuus	annuus	DB_1895	1895	2019 common garden	NA	0.741945	0.655927
1895-9	Helianthus annuus	annuus	DB_1895	1895	2019 common garden	NA	0.785839	0.714452
1912-1	Helianthus annuus	annuus	DB_1912	1912	2019 common garden	NA	0.731721	0.642295
1912-10	Helianthus annuus	annuus	DB_1912	1912	2019 common garden	NA	0.55588	0.55588
1912-11	Helianthus annuus	annuus	DB_1912	1912	2019 common garden	NA	0.635425	0.513899
1912-13	Helianthus annuus	annuus	DB_1912	1912	2019 common garden	NA	0.872481	0.744963
1912-14	Helianthus annuus	annuus	DB_1912	1912	2019 common garden	NA	0.548368	0.548368
1912-15	Helianthus annuus	annuus	DB_1912	1912	2019 common garden	NA	0.473677	0.473677
1912-2	Helianthus annuus	annuus	DB_1912	1912	2019 common garden	NA	1	1
1912-3	Helianthus annuus	annuus	DB_1912	1912	2019 common garden	NA	0.610946	0.610946
1912-4	Helianthus annuus	annuus	DB_1912	1912	2019 common garden	NA	0.53752	0.53752
1912-6	Helianthus annuus	annuus	DB_1912	1912	2019 common garden	NA	0.857182	0.714365
1912-8	Helianthus annuus	annuus	DB_1912	1912	2019 common garden	NA	0.433107	0.433107
1912-9	Helianthus annuus	annuus	DB_1912	1912	2019 common garden	NA	0.654626	0.539502
1919-10	Helianthus annuus	annuus	DB_1919	ANN_46	2019 common garden	NA	0.615688	0.615688
1919-11	Helianthus annuus	annuus	DB_1919	ANN_46	2019 common garden	NA	0.940779	0.881559
1919-15	Helianthus annuus	annuus	DB_1919	ANN_46	2019 common garden	NA	1	1
1919-16	Helianthus annuus	annuus	DB_1919	ANN_46	2019 common garden	NA	1	1
1919-17	Helianthus annuus	annuus	DB_1919	ANN_46	2019 common garden	NA	0.611926	0.611926
1919-19	Helianthus annuus	annuus	DB_1919	ANN_46	2019 common garden	NA	0.891973	0.783947
1919-21	Helianthus annuus	annuus	DB_1919	ANN_46	2019 common garden	NA	0.629019	0.629019
1919-24	Helianthus annuus	annuus	DB_1919	ANN_46	2019 common garden	NA	0.614631	0.486175
1919-27	Helianthus annuus	annuus	DB_1919	ANN_46	2019 common garden	NA	0.857371	0.714742
1919-28	Helianthus annuus	annuus	DB_1919	ANN_46	2019 common garden	NA	0.608279	0.477705
1919-7	Helianthus annuus	annuus	DB_1919	ANN_46	2019 common garden	NA	0.770538	0.541076
1919-9	Helianthus annuus	annuus	DB_1919	ANN_46	2019 common garden	NA	0.57677	0.57677
1920-10	Helianthus annuus	annuus	DB_1920	ANN_47	2019 common garden	NA	0.498132	0.498132
1920-12	Helianthus annuus	annuus	DB_1920	ANN_47	2019 common garden	NA	0.347983	0.347983
1920-2	Helianthus annuus	annuus	DB_1920	ANN_47	2019 common garden	NA	0.511707	0.511707
1920-23	Helianthus annuus	annuus	DB_1920	ANN_47	2019 common garden	NA	0.376509	0.376509
1920-24	Helianthus annuus	annuus	DB_1920	ANN_47	2019 common garden	NA	0.507952	0.507952
1920-25	Helianthus annuus	annuus	DB_1920	ANN_47	2019 common garden	NA	0.260972	0.260972
1920-26	Helianthus annuus	annuus	DB_1920	ANN_47	2019 common garden	NA	0.311641	0.311641
1920-27	Helianthus annuus	annuus	DB_1920	ANN_47	2019 common garden	NA	0.370236	0.370236
1920-3	Helianthus annuus	annuus	DB_1920	ANN_47	2019 common garden	NA	0.601544	0.468726
1927-13	Helianthus annuus	annuus	DB_1927	ANN_50	2019 common garden	NA	0.702368	0.603157
1927-15	Helianthus annuus	annuus	DB_1927	ANN_50	2019 common garden	NA	1	1
1927-19	Helianthus annuus	annuus	DB_1927	ANN_50	2019 common garden	NA	0.637372	0.637372
1927-21	Helianthus annuus	annuus	DB_1927	ANN_50	2019 common garden	NA	1	1
1927-25	Helianthus annuus	annuus	DB_1927	ANN_50	2019 common garden	NA	0.902895	0.80579
1927-4	Helianthus annuus	annuus	DB_1927	ANN_50	2019 common garden	NA	1	1
1927-6	Helianthus annuus	annuus	DB_1927	ANN_50	2019 common garden	NA	0.715684	0.620912
1927-7	Helianthus annuus	annuus	DB_1927	ANN_50	2019 common garden	NA	0.797589	0.595178
1927-9	Helianthus annuus	annuus	DB_1927	ANN_50	2019 common garden	NA	1	1
1938-1	Helianthus annuus	annuus	DB_1938	ANN_51	2019 common garden	NA	0.861799	0.723598
1938-10	Helianthus annuus	annuus	DB_1938	ANN_51	2019 common garden	NA	0.630317	0.507089
1938-11	Helianthus annuus	annuus	DB_1938	ANN_51	2019 common garden	NA	1	1
1938-14	Helianthus annuus	annuus	DB_1938	ANN_51	2019 common garden	NA	0.770567	0.69409
1938-16	Helianthus annuus	annuus	DB_1938	ANN_51	2019 common garden	NA	1	1
1938-2	Helianthus annuus	annuus	DB_1938	ANN_51	2019 common garden	NA	0.6893	0.585734
1938-20	Helianthus annuus	annuus	DB_1938	ANN_51	2019 common garden	NA	0.854155	0.70831
1938-3	Helianthus annuus	annuus	DB_1938	ANN_51	2019 common garden	NA	0.840428	0.680855
1938-4	Helianthus annuus	annuus	DB_1938	ANN_51	2019 common garden	NA	1	1
1938-8	Helianthus annuus	annuus	DB_1938	ANN_51	2019 common garden	NA	0.684968	0.579957
1938-9	Helianthus annuus	annuus	DB_1938	ANN_51	2019 common garden	NA	0.818327	0.636653
1941-13	Helianthus annuus	annuus	DB_1941	ANN_52	2019 common garden	NA	0.456887	0.456887
1941-15	Helianthus annuus	annuus	DB_1941	ANN_52	2019 common garden	NA	0.651467	0.651467
1941-18	Helianthus annuus	annuus	DB_1941	ANN_52	2019 common garden	NA	0.531513	0.531513
1941-19	Helianthus annuus	annuus	DB_1941	ANN_52	2019 common garden	NA	0.382096	0.382096
1941-2	Helianthus annuus	annuus	DB_1941	ANN_52	2019 common garden	NA	0.359208	0.359208
1941-3	Helianthus annuus	annuus	DB_1941	ANN_52	2019 common garden	NA	0.447195	0.447195
1941-4	Helianthus annuus	annuus	DB_1941	ANN_52	2019 common garden	NA	0.465887	0.465887
1941-5	Helianthus annuus	annuus	DB_1941	ANN_52	2019 common garden	NA	0.56985	0.56985
1941-7	Helianthus annuus	annuus	DB_1941	ANN_52	2019 common garden	NA	0.557806	0.557806
1942-1	Helianthus annuus	annuus	DB_1942	ANN_53	2019 common garden	NA	0.447414	0.447414
1942-10	Helianthus annuus	annuus	DB_1942	ANN_53	2019 common garden	NA	0.476854	0.476854
1942-13	Helianthus annuus	annuus	DB_1942	ANN_53	2019 common garden	NA	0.447817	0.447817
1942-14	Helianthus annuus	annuus	DB_1942	ANN_53	2019 common garden	NA	0.604413	0.604413
1942-17	Helianthus annuus	annuus	DB_1942	ANN_53	2019 common garden	NA	0.320173	0.320173
1942-18	Helianthus annuus	annuus	DB_1942	ANN_53	2019 common garden	NA	0.382279	0.382279
1942-2	Helianthus annuus	annuus	DB_1942	ANN_53	2019 common garden	NA	0.406801	0.406801
1942-20	Helianthus annuus	annuus	DB_1942	ANN_53	2019 common garden	NA	0.61136	0.481813
1942-23	Helianthus annuus	annuus	DB_1942	ANN_53	2019 common garden	NA	0.631848	0.50913
1942-25	Helianthus annuus	annuus	DB_1942	ANN_53	2019 common garden	NA	0.364858	0.364858
1942-26	Helianthus annuus	annuus	DB_1942	ANN_53	2019 common garden	NA	0.498297	0.498297
1942-8	Helianthus annuus	annuus	DB_1942	ANN_53	2019 common garden	NA	0.472647	0.472647
1951-12	Helianthus annuus	texanus	DB_1951	ANN_54	2019 common garden	NA	0.315581	0.315581
1951-13	Helianthus annuus	texanus	DB_1951	ANN_54	2019 common garden	NA	0.275089	0.275089
1951-19	Helianthus annuus	texanus	DB_1951	ANN_54	2019 common garden	NA	0.354723	0.354723
1951-22	Helianthus annuus	texanus	DB_1951	ANN_54	2019 common garden	NA	0.280165	0.280165
1951-23	Helianthus annuus	texanus	DB_1951	ANN_54	2019 common garden	NA	0.247341	0.247341
1951-24	Helianthus annuus	texanus	DB_1951	ANN_54	2019 common garden	NA	0.250739	0.250739
1951-26	Helianthus annuus	texanus	DB_1951	ANN_54	2019 common garden	NA	0.36906	0.36906
1951-3	Helianthus annuus	texanus	DB_1951	ANN_54	2019 common garden	NA	0.222715	0.222715
1951-4	Helianthus annuus	texanus	DB_1951	ANN_54	2019 common garden	NA	0.200221	0.200221
1951-5	Helianthus annuus	texanus	DB_1951	ANN_54	2019 common garden	NA	0.332536	0.332536
1951-8	Helianthus annuus	texanus	DB_1951	ANN_54	2019 common garden	NA	0.243235	0.243235
1954-1	Helianthus annuus	texanus	DB_1954	ANN_55	2019 common garden	NA	0.195219	0.195219
1954-11	Helianthus annuus	texanus	DB_1954	ANN_55	2019 common garden	NA	0.161031	0.161031
1954-17	Helianthus annuus	texanus	DB_1954	ANN_55	2019 common garden	NA	0.245506	0.245506
1954-2	Helianthus annuus	texanus	DB_1954	ANN_55	2019 common garden	NA	0.311487	0.311487
1954-21	Helianthus annuus	texanus	DB_1954	ANN_55	2019 common garden	NA	0.182823	0.182823
1954-27	Helianthus annuus	texanus	DB_1954	ANN_55	2019 common garden	NA	0	0
1954-28	Helianthus annuus	texanus	DB_1954	ANN_55	2019 common garden	NA	0.157398	0.157398
1954-29	Helianthus annuus	texanus	DB_1954	ANN_55	2019 common garden	NA	0.1552	0.1552
1954-30	Helianthus annuus	texanus	DB_1954	ANN_55	2019 common garden	NA	0.197252	0.197252
1954-31	Helianthus annuus	texanus	DB_1954	ANN_55	2019 common garden	NA	0.210545	0.210545
1954-8	Helianthus annuus	texanus	DB_1954	ANN_55	2019 common garden	NA	0.313134	0.313134
1954-9	Helianthus annuus	texanus	DB_1954	ANN_55	2019 common garden	NA	0.22448	0.22448
1968-1	Helianthus annuus	texanus	DB_1968	ANN_57	2019 common garden	NA	0.137879	0.137879
1968-11	Helianthus annuus	texanus	DB_1968	ANN_57	2019 common garden	NA	0.287106	0.287106
1968-12	Helianthus annuus	texanus	DB_1968	ANN_57	2019 common garden	NA	0.239607	0.239607
1968-16	Helianthus annuus	texanus	DB_1968	ANN_57	2019 common garden	NA	0.245098	0.245098
1968-17	Helianthus annuus	texanus	DB_1968	ANN_57	2019 common garden	NA	0.241979	0.241979
1968-19	Helianthus annuus	texanus	DB_1968	ANN_57	2019 common garden	NA	0.32731	0.32731
1968-2	Helianthus annuus	texanus	DB_1968	ANN_57	2019 common garden	NA	0.273513	0.273513
1968-5	Helianthus annuus	texanus	DB_1968	ANN_57	2019 common garden	NA	0.0342698	0.0342698
1968-7	Helianthus annuus	texanus	DB_1968	ANN_57	2019 common garden	NA	0.37249	0.37249
1968-8	Helianthus annuus	texanus	DB_1968	ANN_57	2019 common garden	NA	0.245444	0.245444
1968-9	Helianthus annuus	texanus	DB_1968	ANN_57	2019 common garden	NA	0.329713	0.329713
1976-1	Helianthus annuus	texanus	DB_1976	ANN_59	2019 common garden	NA	0.252858	0.252858
1976-11	Helianthus annuus	texanus	DB_1976	ANN_59	2019 common garden	NA	0.188639	0.188639
1976-13	Helianthus annuus	texanus	DB_1976	ANN_59	2019 common garden	NA	0.232546	0.232546
1976-14	Helianthus annuus	texanus	DB_1976	ANN_59	2019 common garden	NA	0.219717	0.219717
1976-16	Helianthus annuus	texanus	DB_1976	ANN_59	2019 common garden	NA	0.224945	0.224945
1976-17	Helianthus annuus	texanus	DB_1976	ANN_59	2019 common garden	NA	0.186182	0.186182
1976-19	Helianthus annuus	texanus	DB_1976	ANN_59	2019 common garden	NA	0.0835174	0.0835174
1976-2	Helianthus annuus	texanus	DB_1976	ANN_59	2019 common garden	NA	0.195169	0.195169
1976-20	Helianthus annuus	texanus	DB_1976	ANN_59	2019 common garden	NA	0.194456	0.194456
1976-3	Helianthus annuus	texanus	DB_1976	ANN_59	2019 common garden	NA	0.199754	0.199754
1976-7	Helianthus annuus	texanus	DB_1976	ANN_59	2019 common garden	NA	0.20937	0.20937
1976-8	Helianthus annuus	texanus	DB_1976	ANN_59	2019 common garden	NA	0.147711	0.147711
1990-1	Helianthus annuus	texanus	DB_1990	ANN_61	2019 common garden	NA	0.325141	0.325141
1990-12	Helianthus annuus	texanus	DB_1990	ANN_61	2019 common garden	NA	0.273127	0.273127
1990-16	Helianthus annuus	texanus	DB_1990	ANN_61	2019 common garden	NA	0.364548	0.364548
1990-20	Helianthus annuus	texanus	DB_1990	ANN_61	2019 common garden	NA	0.192877	0.192877
1990-21	Helianthus annuus	texanus	DB_1990	ANN_61	2019 common garden	NA	0.238876	0.238876
1990-24	Helianthus annuus	texanus	DB_1990	ANN_61	2019 common garden	NA	0.162808	0.162808
1990-26	Helianthus annuus	texanus	DB_1990	ANN_61	2019 common garden	NA	0.192725	0.192725
1990-28	Helianthus annuus	texanus	DB_1990	ANN_61	2019 common garden	NA	0.332405	0.332405
1990-4	Helianthus annuus	texanus	DB_1990	ANN_61	2019 common garden	NA	0.256606	0.256606
1990-5	Helianthus annuus	texanus	DB_1990	ANN_61	2019 common garden	NA	0.264856	0.264856
2139-1	Helianthus annuus	annuus	DB_2139	2139	2019 common garden	NA	0.630691	0.630691
2139-11	Helianthus annuus	annuus	DB_2139	2139	2019 common garden	NA	0.442736	0.442736
2139-12	Helianthus annuus	annuus	DB_2139	2139	2019 common garden	NA	0.68458	0.68458
2139-13	Helianthus annuus	annuus	DB_2139	2139	2019 common garden	NA	0.612967	0.612967
2139-15	Helianthus annuus	annuus	DB_2139	2139	2019 common garden	NA	0.60111	0.60111
2139-2	Helianthus annuus	annuus	DB_2139	2139	2019 common garden	NA	0.666442	0.666442
2139-3	Helianthus annuus	annuus	DB_2139	2139	2019 common garden	NA	0.680075	0.680075
2139-4	Helianthus annuus	annuus	DB_2139	2139	2019 common garden	NA	0.763245	0.684327
2139-5	Helianthus annuus	annuus	DB_2139	2139	2019 common garden	NA	0.349923	0.349923
2139-6	Helianthus annuus	annuus	DB_2139	2139	2019 common garden	NA	0.636994	0.636994
2139-8	Helianthus annuus	annuus	DB_2139	2139	2019 common garden	NA	0.77137	0.695161
2139-9	Helianthus annuus	annuus	DB_2139	2139	2019 common garden	NA	0.923539	0.847078
2144_6	Helianthus annuus	annuus	DB_2144	2144	2019 common garden	NA	0.566738	0.566738
2144-1	Helianthus annuus	annuus	DB_2144	2144	2019 common garden	NA	0.598223	0.598223
2144-10	Helianthus annuus	annuus	DB_2144	2144	2019 common garden	NA	0.656087	0.656087
2144-12	Helianthus annuus	annuus	DB_2144	2144	2019 common garden	NA	0.531658	0.531658
2144-13	Helianthus annuus	annuus	DB_2144	2144	2019 common garden	NA	0.600662	0.600662
2144-14	Helianthus annuus	annuus	DB_2144	2144	2019 common garden	NA	0.652382	0.53651
2144-15	Helianthus annuus	annuus	DB_2144	2144	2019 common garden	NA	0.47221	0.47221
2144-2	Helianthus annuus	annuus	DB_2144	2144	2019 common garden	NA	0.470187	0.470187
2144-3	Helianthus annuus	annuus	DB_2144	2144	2019 common garden	NA	0.545958	0.394611
2144-4	Helianthus annuus	annuus	DB_2144	2144	2019 common garden	NA	0.5289	0.5289
2144-6	Helianthus annuus	annuus	DB_2144	2144	2019 common garden	NA	0.533074	0.533074
2144-8	Helianthus annuus	annuus	DB_2144	2144	2019 common garden	NA	0.571731	0.571731
2144-9	Helianthus annuus	annuus	DB_2144	2144	2019 common garden	NA	0.883537	0.767075
2145_7	Helianthus annuus	annuus	DB_2145	2145	2019 common garden	NA	0.596506	0.596506
2145-14	Helianthus annuus	annuus	DB_2145	2145	2019 common garden	NA	0.524457	0.524457
2145-16	Helianthus annuus	annuus	DB_2145	2145	2019 common garden	NA	1	1
2145-19	Helianthus annuus	annuus	DB_2145	2145	2019 common garden	NA	0.887386	0.774771
2145-2	Helianthus annuus	annuus	DB_2145	2145	2019 common garden	NA	0.782485	0.70998
2145-22	Helianthus annuus	annuus	DB_2145	2145	2019 common garden	NA	0.612621	0.612621
2145-23	Helianthus annuus	annuus	DB_2145	2145	2019 common garden	NA	0.710676	0.614235
2145-25	Helianthus annuus	annuus	DB_2145	2145	2019 common garden	NA	0.750449	0.667265
2145-26	Helianthus annuus	annuus	DB_2145	2145	2019 common garden	NA	0.825296	0.650592
2145-29	Helianthus annuus	annuus	DB_2145	2145	2019 common garden	NA	0.595801	0.595801
2145-9	Helianthus annuus	annuus	DB_2145	2145	2019 common garden	NA	0.605671	0.605671
2149-1	Helianthus annuus	annuus	DB_2149	2149	2019 common garden	NA	0.78849	0.576979
2149-10	Helianthus annuus	annuus	DB_2149	2149	2019 common garden	NA	0.84732	0.694641
2149-11	Helianthus annuus	annuus	DB_2149	2149	2019 common garden	NA	1	1
2149-13	Helianthus annuus	annuus	DB_2149	2149	2019 common garden	NA	0.755216	0.673622
2149-14	Helianthus annuus	annuus	DB_2149	2149	2019 common garden	NA	0.80196	0.60392
2149-15	Helianthus annuus	annuus	DB_2149	2149	2019 common garden	NA	0.70622	0.608293
2149-4	Helianthus annuus	annuus	DB_2149	2149	2019 common garden	NA	0.786854	0.573708
2149-5	Helianthus annuus	annuus	DB_2149	2149	2019 common garden	NA	0.632195	0.632195
2149-6	Helianthus annuus	annuus	DB_2149	2149	2019 common garden	NA	0.969105	0.938209
2149-7	Helianthus annuus	annuus	DB_2149	2149	2019 common garden	NA	0.762991	0.683988
2149-8	Helianthus annuus	annuus	DB_2149	2149	2019 common garden	NA	0.720516	0.627355
2149-9	Helianthus annuus	annuus	DB_2149	2149	2019 common garden	NA	0.706382	0.60851
2174-1	Helianthus annuus	annuus	DB_2174	2174	2019 common garden	NA	0.775816	0.701088
2174-10	Helianthus annuus	annuus	DB_2174	2174	2019 common garden	NA	0.831976	0.663951
2174-11	Helianthus annuus	annuus	DB_2174	2174	2019 common garden	NA	0.727049	0.636065
2174-12	Helianthus annuus	annuus	DB_2174	2174	2019 common garden	NA	0.912094	0.824189
2174-2	Helianthus annuus	annuus	DB_2174	2174	2019 common garden	NA	0.780936	0.707915
2174-4	Helianthus annuus	annuus	DB_2174	2174	2019 common garden	NA	0.899654	0.799309
2174-5	Helianthus annuus	annuus	DB_2174	2174	2019 common garden	NA	0.647984	0.647984
2174-6	Helianthus annuus	annuus	DB_2174	2174	2019 common garden	NA	0.655555	0.655555
2174-7	Helianthus annuus	annuus	DB_2174	2174	2019 common garden	NA	0.593722	0.593722
2174-8	Helianthus annuus	annuus	DB_2174	2174	2019 common garden	NA	0.664529	0.664529
2174-9	Helianthus annuus	annuus	DB_2174	2174	2019 common garden	NA	0.874389	0.748778
AMES-2_12	Helianthus annuus	annuus	AMES-2	AMES 33885	2019 common garden	NA	0.803477	0.606954
AMES-2_15	Helianthus annuus	annuus	AMES-2	AMES 33885	2019 common garden	NA	0.515776	0.515776
AMES-2_17	Helianthus annuus	annuus	AMES-2	AMES 33885	2019 common garden	NA	0.672699	0.563598
AMES-2_18	Helianthus annuus	annuus	AMES-2	AMES 33885	2019 common garden	NA	0.8124	0.624799
AMES-2_19	Helianthus annuus	annuus	AMES-2	AMES 33885	2019 common garden	NA	0.955847	0.911693
AMES-2_2	Helianthus annuus	annuus	AMES-2	AMES 33885	2019 common garden	NA	0.658416	0.544555
AMES-2_24	Helianthus annuus	annuus	AMES-2	AMES 33885	2019 common garden	NA	0.510065	0.510065
AMES-2_3	Helianthus annuus	annuus	AMES-2	AMES 33885	2019 common garden	NA	1	1
AMES-2_32	Helianthus annuus	annuus	AMES-2	AMES 33885	2019 common garden	NA	1	1
AMES-2_4	Helianthus annuus	annuus	AMES-2	AMES 33885	2019 common garden	NA	0.678364	0.678364
AMES-2_7	Helianthus annuus	annuus	AMES-2	AMES 33885	2019 common garden	NA	0.920822	0.841644
AMES-2-15	Helianthus annuus	annuus	AMES-2	AMES 33885	2019 common garden	NA	0.705302	0.607069
AMES-3_10	Helianthus annuus	annuus	AMES-3	AMES 34244	2019 common garden	NA	0.616744	0.488993
AMES-3_11	Helianthus annuus	annuus	AMES-3	AMES 34244	2019 common garden	NA	0.663593	0.663593
AMES-3_14	Helianthus annuus	annuus	AMES-3	AMES 34244	2019 common garden	NA	0.805802	0.741069
AMES-3_20	Helianthus annuus	annuus	AMES-3	AMES 34244	2019 common garden	NA	0.673992	0.565323
AMES-3_21	Helianthus annuus	annuus	AMES-3	AMES 34244	2019 common garden	NA	0.764763	0.68635
AMES-3_23	Helianthus annuus	annuus	AMES-3	AMES 34244	2019 common garden	NA	0.499426	0.499426
AMES-3_28	Helianthus annuus	annuus	AMES-3	AMES 34244	2019 common garden	NA	0.641805	0.522407
AMES-3_29	Helianthus annuus	annuus	AMES-3	AMES 34244	2019 common garden	NA	0.745811	0.745811
AMES-3_30	Helianthus annuus	annuus	AMES-3	AMES 34244	2019 common garden	NA	0.826047	0.652094
AMES-3_40	Helianthus annuus	annuus	AMES-3	AMES 34244	2019 common garden	NA	0.852583	0.705166
AMES-3_44	Helianthus annuus	annuus	AMES-3	AMES 34244	2019 common garden	NA	0.812989	0.625978
AMES-3_47	Helianthus annuus	annuus	AMES-3	AMES 34244	2019 common garden	NA	1	1
AMES-3_52	Helianthus annuus	annuus	AMES-3	AMES 34244	2019 common garden	NA	0.854053	0.708106
IA1W-33	Helianthus annuus	annuus	IA1W	ANN_62, DB_2157	2019 common garden	NA	0.513915	0.513915
IA1W-38	Helianthus annuus	annuus	IA1W	ANN_62, DB_2157	2019 common garden	NA	0.527403	0.527403
IA2W-16	Helianthus annuus	annuus	IA2W	ANN_63, DB_2156	2019 common garden	NA	0.838497	0.676994
IA2W-7	Helianthus annuus	annuus	IA2W	ANN_63, DB_2156	2019 common garden	NA	0.619349	0.492466
KS1W-24	Helianthus annuus	annuus	KS1W	ANN_64, DB_2154	2019 common garden	NA	0.55973	0.55973
KS1W-32	Helianthus annuus	annuus	KS1W	ANN_64, DB_2154	2019 common garden	NA	0.36911	0.36911
KS1W-40	Helianthus annuus	annuus	KS1W	ANN_64, DB_2154	2019 common garden	NA	0.613851	0.485135
KS2W-13	Helianthus annuus	annuus	KS2W	ANN_65, DB_2153	2019 common garden	NA	0.738475	0.6513
KS2W-15	Helianthus annuus	annuus	KS2W	ANN_65, DB_2153	2019 common garden	NA	0.600044	0.600044
KS2W-17	Helianthus annuus	annuus	KS2W	ANN_65, DB_2153	2019 common garden	NA	0.850953	0.701907
KS2W-31	Helianthus annuus	annuus	KS2W	ANN_65, DB_2153	2019 common garden	NA	0.864354	0.728707
KS2W-32	Helianthus annuus	annuus	KS2W	ANN_65, DB_2153	2019 common garden	NA	0.589263	0.589263
KS2W-5	Helianthus annuus	annuus	KS2W	ANN_65, DB_2153	2019 common garden	NA	0.741392	0.655189
KS2W-9	Helianthus annuus	annuus	KS2W	ANN_65, DB_2153	2019 common garden	NA	0.48972	0.48972
MB1W-11	Helianthus annuus	annuus	MB1W	ANN_66, DB_2166	2019 common garden	NA	0.887114	0.774229
MB1W-14	Helianthus annuus	annuus	MB1W	ANN_66, DB_2166	2019 common garden	NA	0.485423	0.485423
MB1W-15	Helianthus annuus	annuus	MB1W	ANN_66, DB_2166	2019 common garden	NA	0.621765	0.621765
MB1W-17	Helianthus annuus	annuus	MB1W	ANN_66, DB_2166	2019 common garden	NA	0.79677	0.593541
MB1W-23	Helianthus annuus	annuus	MB1W	ANN_66, DB_2166	2019 common garden	NA	0.565221	0.565221
MB1W-24	Helianthus annuus	annuus	MB1W	ANN_66, DB_2166	2019 common garden	NA	0.604934	0.604934
MB1W-3	Helianthus annuus	annuus	MB1W	ANN_66, DB_2166	2019 common garden	NA	0.664866	0.553155
MB1W-31	Helianthus annuus	annuus	MB1W	ANN_66, DB_2166	2019 common garden	NA	0.689507	0.586009
MB1W-32	Helianthus annuus	annuus	MB1W	ANN_66, DB_2166	2019 common garden	NA	0.511325	0.511325
MB1W-40	Helianthus annuus	annuus	MB1W	ANN_66, DB_2166	2019 common garden	NA	0.726169	0.634892
MB1W-7	Helianthus annuus	annuus	MB1W	ANN_66, DB_2166	2019 common garden	NA	0.792338	0.584677
MB1W-8	Helianthus annuus	annuus	MB1W	ANN_66, DB_2166	2019 common garden	NA	0.729309	0.639079
MB1W-9	Helianthus annuus	annuus	MB1W	ANN_66, DB_2166	2019 common garden	NA	0.676976	0.569302
MO1W-2	Helianthus annuus	annuus	MO1W	ANN_67, MO1W	2019 common garden	NA	0.375312	0.375312
MO1W-27	Helianthus annuus	annuus	MO1W	ANN_67, MO1W	2019 common garden	NA	0.632478	0.509971
MO1W-7	Helianthus annuus	annuus	MO1W	ANN_67, MO1W	2019 common garden	NA	0.733465	0.466929
ND1W-1	Helianthus annuus	annuus	ND1W	ANN_68, DB_2162	2019 common garden	NA	0.713739	0.618318
ND1W-12	Helianthus annuus	annuus	ND1W	ANN_68, DB_2162	2019 common garden	NA	0.63364	0.63364
ND1W-14	Helianthus annuus	annuus	ND1W	ANN_68, DB_2162	2019 common garden	NA	0.830798	0.661595
ND1W-20	Helianthus annuus	annuus	ND1W	ANN_68, DB_2162	2019 common garden	NA	0.821839	0.643678
ND1W-25	Helianthus annuus	annuus	ND1W	ANN_68, DB_2162	2019 common garden	NA	0.755922	0.674563
ND1W-27	Helianthus annuus	annuus	ND1W	ANN_68, DB_2162	2019 common garden	NA	0.610898	0.610898
ND1W-31	Helianthus annuus	annuus	ND1W	ANN_68, DB_2162	2019 common garden	NA	0.95078	0.90156
ND1W-34	Helianthus annuus	annuus	ND1W	ANN_68, DB_2162	2019 common garden	NA	0.815108	0.630215
ND1W-36	Helianthus annuus	annuus	ND1W	ANN_68, DB_2162	2019 common garden	NA	1	1
ND1W-5	Helianthus annuus	annuus	ND1W	ANN_68, DB_2162	2019 common garden	NA	0.66178	0.66178
ND1W-6	Helianthus annuus	annuus	ND1W	ANN_68, DB_2162	2019 common garden	NA	0.800021	0.600041
PI-10_1	Helianthus annuus	annuus	PI-10	ANN-1259	2019 common garden	NA	0.635487	0.635487
PI-10_13	Helianthus annuus	annuus	PI-10	ANN-1259	2019 common garden	NA	0.645054	0.645054
PI-10_15	Helianthus annuus	annuus	PI-10	ANN-1259	2019 common garden	NA	0.858319	0.716639
PI-10_16	Helianthus annuus	annuus	PI-10	ANN-1259	2019 common garden	NA	0.80069	0.601381
PI-10_18	Helianthus annuus	annuus	PI-10	ANN-1259	2019 common garden	NA	0.782662	0.565324
PI-10_22	Helianthus annuus	annuus	PI-10	ANN-1259	2019 common garden	NA	1	1
PI-10_25	Helianthus annuus	annuus	PI-10	ANN-1259	2019 common garden	NA	0.878617	0.757234
PI-10_26	Helianthus annuus	annuus	PI-10	ANN-1259	2019 common garden	NA	0.860859	0.721719
PI-10_27	Helianthus annuus	annuus	PI-10	ANN-1259	2019 common garden	NA	0.840722	0.681444
PI-10_7	Helianthus annuus	annuus	PI-10	ANN-1259	2019 common garden	NA	1	1
PI-12_15	Helianthus annuus	annuus	PI-12	ANN-1285	2019 common garden	NA	0.724867	0.449733
PI-12_17	Helianthus annuus	annuus	PI-12	ANN-1285	2019 common garden	NA	0.372197	0.372197
PI-12_19	Helianthus annuus	annuus	PI-12	ANN-1285	2019 common garden	NA	0.479893	0.479893
PI-12_20	Helianthus annuus	annuus	PI-12	ANN-1285	2019 common garden	NA	0.486465	0.486465
PI-12_21	Helianthus annuus	annuus	PI-12	ANN-1285	2019 common garden	NA	0.419307	0.419307
PI-12_24	Helianthus annuus	annuus	PI-12	ANN-1285	2019 common garden	NA	0.649977	0.533302
PI-12_25	Helianthus annuus	annuus	PI-12	ANN-1285	2019 common garden	NA	0.414956	0.414956
PI-12_26	Helianthus annuus	annuus	PI-12	ANN-1285	2019 common garden	NA	0.526475	0.368633
PI-12_27	Helianthus annuus	annuus	PI-12	ANN-1285	2019 common garden	NA	0.46875	0.46875
PI-12_3	Helianthus annuus	annuus	PI-12	ANN-1285	2019 common garden	NA	0.491254	0.491254
PI-12_30	Helianthus annuus	annuus	PI-12	ANN-1285	2019 common garden	NA	0.557908	0.557908
PI-12_45	Helianthus annuus	annuus	PI-12	ANN-1285	2019 common garden	NA	0.396255	0.396255
PI-12_5	Helianthus annuus	annuus	PI-12	ANN-1285	2019 common garden	NA	0.362803	0.362803
PI-12_7	Helianthus annuus	annuus	PI-12	ANN-1285	2019 common garden	NA	0.393856	0.393856
PI-13_11	Helianthus annuus	annuus	PI-13	ANN-1393	2019 common garden	NA	0.494701	0.494701
PI-13_13	Helianthus annuus	annuus	PI-13	ANN-1393	2019 common garden	NA	0.787823	0.575645
PI-13_16	Helianthus annuus	annuus	PI-13	ANN-1393	2019 common garden	NA	0.739673	0.652897
PI-13_2	Helianthus annuus	annuus	PI-13	ANN-1393	2019 common garden	NA	0.832291	0.664582
PI-13_24	Helianthus annuus	annuus	PI-13	ANN-1393	2019 common garden	NA	0.833744	0.667487
PI-14_1	Helianthus annuus	annuus	PI-14	ANN-1529	2019 common garden	NA	0.387466	0.387466
PI-14_11	Helianthus annuus	annuus	PI-14	ANN-1529	2019 common garden	NA	0.472053	0.472053
PI-14_13	Helianthus annuus	annuus	PI-14	ANN-1529	2019 common garden	NA	0.351166	0.351166
PI-14_16	Helianthus annuus	annuus	PI-14	ANN-1529	2019 common garden	NA	0.540637	0.540637
PI-14_17	Helianthus annuus	annuus	PI-14	ANN-1529	2019 common garden	NA	0.408906	0.408906
PI-14_20	Helianthus annuus	annuus	PI-14	ANN-1529	2019 common garden	NA	0.506125	0.506125
PI-14_26	Helianthus annuus	annuus	PI-14	ANN-1529	2019 common garden	NA	0.219814	0.219814
PI-14_28	Helianthus annuus	annuus	PI-14	ANN-1529	2019 common garden	NA	0.372808	0.372808
PI-14_3	Helianthus annuus	annuus	PI-14	ANN-1529	2019 common garden	NA	0.506125	0.506125
PI-14_5	Helianthus annuus	annuus	PI-14	ANN-1529	2019 common garden	NA	0.435426	0.435426
PI-15_1	Helianthus annuus	annuus	PI-15	1995	2019 common garden	NA	0.492642	0.492642
PI-15_11	Helianthus annuus	annuus	PI-15	1995	2019 common garden	NA	0.822846	0.645692
PI-15_12	Helianthus annuus	annuus	PI-15	1995	2019 common garden	NA	0.910411	0.820821
PI-15_14	Helianthus annuus	annuus	PI-15	1995	2019 common garden	NA	0.762931	0.762931
PI-15_16	Helianthus annuus	annuus	PI-15	1995	2019 common garden	NA	0.881356	0.762712
PI-15_20	Helianthus annuus	annuus	PI-15	1995	2019 common garden	NA	0.98764	0.975281
PI-15_24	Helianthus annuus	annuus	PI-15	1995	2019 common garden	NA	0.588568	0.588568
PI-15_25	Helianthus annuus	annuus	PI-15	1995	2019 common garden	NA	0.67575	0.567667
PI-15_27	Helianthus annuus	annuus	PI-15	1995	2019 common garden	NA	0.360291	0.360291
PI-15_29	Helianthus annuus	annuus	PI-15	1995	2019 common garden	NA	0.711757	0.615676
PI-15_5	Helianthus annuus	annuus	PI-15	1995	2019 common garden	NA	0.727659	0.636879
PI-15_9	Helianthus annuus	annuus	PI-15	1995	2019 common garden	NA	0.692982	0.590643
PI-16_10	Helianthus annuus	annuus	PI-16	ANN-2093	2019 common garden	NA	0.605036	0.473381
PI-16_17	Helianthus annuus	annuus	PI-16	ANN-2093	2019 common garden	NA	0.410832	0.410832
PI-16_18	Helianthus annuus	annuus	PI-16	ANN-2093	2019 common garden	NA	0.626541	0.626541
PI-17_11	Helianthus annuus	annuus	PI-17	ANN 2121	2019 common garden	NA	0.537627	0.537627
PI-17_13	Helianthus annuus	annuus	PI-17	ANN 2121	2019 common garden	NA	0.506638	0.506638
PI-17_14	Helianthus annuus	annuus	PI-17	ANN 2121	2019 common garden	NA	0.627692	0.627692
PI-17_21	Helianthus annuus	annuus	PI-17	ANN 2121	2019 common garden	NA	1	1
PI-17_22	Helianthus annuus	annuus	PI-17	ANN 2121	2019 common garden	NA	0.455481	0.455481
PI-17_25	Helianthus annuus	annuus	PI-17	ANN 2121	2019 common garden	NA	0.648101	0.530802
PI-17_28	Helianthus annuus	annuus	PI-17	ANN 2121	2019 common garden	NA	0.889975	0.77995
PI-17_3	Helianthus annuus	annuus	PI-17	ANN 2121	2019 common garden	NA	0.786252	0.572504
PI-17_5	Helianthus annuus	annuus	PI-17	ANN 2121	2019 common garden	NA	0.860828	0.721655
PI-17_6	Helianthus annuus	annuus	PI-17	ANN 2121	2019 common garden	NA	0.705877	0.705877
PI-17_7	Helianthus annuus	annuus	PI-17	ANN 2121	2019 common garden	NA	0.726348	0.635131
PI-18_1	Helianthus annuus	annuus	PI-18	ANN 2137	2019 common garden	NA	0.86757	0.73514
PI-18_17	Helianthus annuus	annuus	PI-18	ANN 2137	2019 common garden	NA	0.63831	0.517746
PI-18_18	Helianthus annuus	annuus	PI-18	ANN 2137	2019 common garden	NA	0.844622	0.689245
PI-18_2	Helianthus annuus	annuus	PI-18	ANN 2137	2019 common garden	NA	0.781891	0.709187
PI-18_22	Helianthus annuus	annuus	PI-18	ANN 2137	2019 common garden	NA	0.642356	0.642356
PI-18_24	Helianthus annuus	annuus	PI-18	ANN 2137	2019 common garden	NA	0.655042	0.655042
PI-18_28	Helianthus annuus	annuus	PI-18	ANN 2137	2019 common garden	NA	0.820803	0.761071
PI-18_51	Helianthus annuus	annuus	PI-18	ANN 2137	2019 common garden	NA	0.702658	0.603544
PI-18_7	Helianthus annuus	annuus	PI-18	ANN 2137	2019 common garden	NA	0.868638	0.737276
PI-18_8	Helianthus annuus	annuus	PI-18	ANN 2137	2019 common garden	NA	0.855972	0.711945
PI-18_9	Helianthus annuus	annuus	PI-18	ANN 2137	2019 common garden	NA	0.876201	0.752403
PI-19_10	Helianthus annuus	annuus	PI-19	ANN-2295	2019 common garden	NA	0.691402	0.691402
PI-19_13	Helianthus annuus	annuus	PI-19	ANN-2295	2019 common garden	NA	0.906416	0.812832
PI-19_16	Helianthus annuus	annuus	PI-19	ANN-2295	2019 common garden	NA	0.586105	0.586105
PI-19_18	Helianthus annuus	annuus	PI-19	ANN-2295	2019 common garden	NA	0.580777	0.580777
PI-19_2	Helianthus annuus	annuus	PI-19	ANN-2295	2019 common garden	NA	0.755904	0.674539
PI-19_22	Helianthus annuus	annuus	PI-19	ANN-2295	2019 common garden	NA	0.632078	0.632078
PI-19_24	Helianthus annuus	annuus	PI-19	ANN-2295	2019 common garden	NA	0.626032	0.501375
PI-19_5	Helianthus annuus	annuus	PI-19	ANN-2295	2019 common garden	NA	0.630764	0.630764
PI-19_58	Helianthus annuus	annuus	PI-19	ANN-2295	2019 common garden	NA	0.702955	0.702955
PI-19_6	Helianthus annuus	annuus	PI-19	ANN-2295	2019 common garden	NA	0.570516	0.570516
PI-19_7	Helianthus annuus	annuus	PI-19	ANN-2295	2019 common garden	NA	0.74034	0.74034
PI-19_9	Helianthus annuus	annuus	PI-19	ANN-2295	2019 common garden	NA	0.660481	0.547308
PI-20_1	Helianthus annuus	annuus	PI-20	ANN-2298	2019 common garden	NA	0.518489	0.518489
PI-20_11	Helianthus annuus	annuus	PI-20	ANN-2298	2019 common garden	NA	0.585657	0.585657
PI-20_14	Helianthus annuus	annuus	PI-20	ANN-2298	2019 common garden	NA	0.645563	0.645563
PI-20_15	Helianthus annuus	annuus	PI-20	ANN-2298	2019 common garden	NA	0.483313	0.483313
PI-20_16	Helianthus annuus	annuus	PI-20	ANN-2298	2019 common garden	NA	0.417826	0.417826
PI-20_18	Helianthus annuus	annuus	PI-20	ANN-2298	2019 common garden	NA	0.675091	0.566789
PI-20_29	Helianthus annuus	annuus	PI-20	ANN-2298	2019 common garden	NA	0.534428	0.534428
PI-20_30	Helianthus annuus	annuus	PI-20	ANN-2298	2019 common garden	NA	0.742743	0.485486
PI-20_4	Helianthus annuus	annuus	PI-20	ANN-2298	2019 common garden	NA	0.523705	0.523705
PI-20_5	Helianthus annuus	annuus	PI-20	ANN-2298	2019 common garden	NA	0.530177	0.530177
PI-20_59	Helianthus annuus	annuus	PI-20	ANN-2298	2019 common garden	NA	0.730248	0.640331
PI-21_11	Helianthus annuus	annuus	PI-21		2019 common garden	NA	0.698128	0.597503
PI-21_14	Helianthus annuus	annuus	PI-21		2019 common garden	NA	0.808943	0.617885
PI-21_15	Helianthus annuus	annuus	PI-21		2019 common garden	NA	0.572801	0.572801
PI-21_18	Helianthus annuus	annuus	PI-21		2019 common garden	NA	0.807749	0.743666
PI-21_19	Helianthus annuus	annuus	PI-21		2019 common garden	NA	0.526948	0.526948
PI-21_2	Helianthus annuus	annuus	PI-21		2019 common garden	NA	0.498707	0.498707
PI-21_21	Helianthus annuus	annuus	PI-21		2019 common garden	NA	0.553786	0.553786
PI-21_22	Helianthus annuus	annuus	PI-21		2019 common garden	NA	0.489916	0.489916
PI-21_25	Helianthus annuus	annuus	PI-21		2019 common garden	NA	0.868205	0.736409
PI-21_27	Helianthus annuus	annuus	PI-21		2019 common garden	NA	0.823112	0.646225
PI-21_28	Helianthus annuus	annuus	PI-21		2019 common garden	NA	0.522392	0.522392
PI-21_33	Helianthus annuus	annuus	PI-21		2019 common garden	NA	0.568193	0.568193
PI-21_48	Helianthus annuus	annuus	PI-21		2019 common garden	NA	0.697663	0.596884
PI-24_10	Helianthus annuus	annuus	PI-24	ANN-1139	2019 common garden	NA	0.358577	0.358577
PI-24_13	Helianthus annuus	annuus	PI-24	ANN-1139	2019 common garden	NA	0.367673	0.367673
PI-24_16	Helianthus annuus	annuus	PI-24	ANN-1139	2019 common garden	NA	0.280955	0.280955
PI-24_20	Helianthus annuus	annuus	PI-24	ANN-1139	2019 common garden	NA	0.348609	0.348609
PI-24_25	Helianthus annuus	annuus	PI-24	ANN-1139	2019 common garden	NA	0.348047	0.348047
PI-24_27	Helianthus annuus	annuus	PI-24	ANN-1139	2019 common garden	NA	0.329852	0.329852
PI-24_29	Helianthus annuus	annuus	PI-24	ANN-1139	2019 common garden	NA	0.31961	0.31961
PI-24_3	Helianthus annuus	annuus	PI-24	ANN-1139	2019 common garden	NA	0.366646	0.366646
PI-24_4	Helianthus annuus	annuus	PI-24	ANN-1139	2019 common garden	NA	0.285848	0.285848
PI-24_5	Helianthus annuus	annuus	PI-24	ANN-1139	2019 common garden	NA	0.294099	0.294099
PI-26_10	Helianthus annuus	annuus	PI-26	ANN-2507	2019 common garden	NA	0.863066	0.726131
PI-26_11	Helianthus annuus	annuus	PI-26	ANN-2507	2019 common garden	NA	0.889112	0.778224
PI-26_12	Helianthus annuus	annuus	PI-26	ANN-2507	2019 common garden	NA	0.699571	0.599428
PI-26_15	Helianthus annuus	annuus	PI-26	ANN-2507	2019 common garden	NA	0.630237	0.630237
PI-26_16	Helianthus annuus	annuus	PI-26	ANN-2507	2019 common garden	NA	0.974072	0.948144
PI-26_19	Helianthus annuus	annuus	PI-26	ANN-2507	2019 common garden	NA	1	1
PI-26_2	Helianthus annuus	annuus	PI-26	ANN-2507	2019 common garden	NA	0.683857	0.683857
PI-26_20	Helianthus annuus	annuus	PI-26	ANN-2507	2019 common garden	NA	0.635562	0.635562
PI-26_21	Helianthus annuus	annuus	PI-26	ANN-2507	2019 common garden	NA	0.699253	0.599003
PI-26_23	Helianthus annuus	annuus	PI-26	ANN-2507	2019 common garden	NA	0.935506	0.871013
PI-26_25	Helianthus annuus	annuus	PI-26	ANN-2507	2019 common garden	NA	0.85544	0.710879
PI-26_29	Helianthus annuus	annuus	PI-26	ANN-2507	2019 common garden	NA	1	1
PI-27_10	Helianthus annuus	annuus	PI-27	ANN 1238	2019 common garden	NA	0.682357	0.682357
PI-27_12	Helianthus annuus	annuus	PI-27	ANN 1238	2019 common garden	NA	1	1
PI-27_2	Helianthus annuus	annuus	PI-27	ANN 1238	2019 common garden	NA	0.725362	0.633816
PI-27_22	Helianthus annuus	annuus	PI-27	ANN 1238	2019 common garden	NA	0.868788	0.737577
PI-27_24	Helianthus annuus	annuus	PI-27	ANN 1238	2019 common garden	NA	0.861083	0.722167
PI-27_26	Helianthus annuus	annuus	PI-27	ANN 1238	2019 common garden	NA	0.622186	0.622186
PI-27_29	Helianthus annuus	annuus	PI-27	ANN 1238	2019 common garden	NA	0.737612	0.65015
PI-27_3	Helianthus annuus	annuus	PI-27	ANN 1238	2019 common garden	NA	0.701189	0.701189
PI-27_4	Helianthus annuus	annuus	PI-27	ANN 1238	2019 common garden	NA	1	1
PI-27_7	Helianthus annuus	annuus	PI-27	ANN 1238	2019 common garden	NA	0.828796	0.771728
PI-27_9	Helianthus annuus	annuus	PI-27	ANN 1238	2019 common garden	NA	0.702556	0.680065
PI-29_19	Helianthus annuus	annuus	PI-29	ANN-2642	2019 common garden	NA	0.406161	0.406161
PI-29_22	Helianthus annuus	annuus	PI-29	ANN-2642	2019 common garden	NA	0.623714	0.498285
PI-29_5	Helianthus annuus	annuus	PI-29	ANN-2642	2019 common garden	NA	0.574347	0.574347
PI-30_10	Helianthus annuus	annuus	PI-30	ANN-2671	2019 common garden	NA	0.531616	0.531616
PI-30_11	Helianthus annuus	annuus	PI-30	ANN-2671	2019 common garden	NA	0.393253	0.393253
PI-30_12	Helianthus annuus	annuus	PI-30	ANN-2671	2019 common garden	NA	0.664795	0.55306
PI-30_13	Helianthus annuus	annuus	PI-30	ANN-2671	2019 common garden	NA	0.480769	0.480769
PI-30_14	Helianthus annuus	annuus	PI-30	ANN-2671	2019 common garden	NA	0.409373	0.409373
PI-30_16	Helianthus annuus	annuus	PI-30	ANN-2671	2019 common garden	NA	0.434904	0.434904
PI-30_17	Helianthus annuus	annuus	PI-30	ANN-2671	2019 common garden	NA	0.417766	0.417766
PI-30_19	Helianthus annuus	annuus	PI-30	ANN-2671	2019 common garden	NA	0.511068	0.511068
PI-30_21	Helianthus annuus	annuus	PI-30	ANN-2671	2019 common garden	NA	0.468344	0.468344
PI-30_23	Helianthus annuus	annuus	PI-30	ANN-2671	2019 common garden	NA	0.61783	0.61783
PI-30_6	Helianthus annuus	annuus	PI-30	ANN-2671	2019 common garden	NA	0.549552	0.549552
PI-30_9	Helianthus annuus	annuus	PI-30	ANN-2671	2019 common garden	NA	0.539982	0.539982
PI-31_13	Helianthus annuus	annuus	PI-31	Eubank 1	2019 common garden	NA	0.4206	0.4206
PI-31_14	Helianthus annuus	annuus	PI-31	Eubank 1	2019 common garden	NA	0.500281	0.500281
PI-31_17	Helianthus annuus	annuus	PI-31	Eubank 1	2019 common garden	NA	0.624562	0.624562
PI-31_18	Helianthus annuus	annuus	PI-31	Eubank 1	2019 common garden	NA	0.460064	0.460064
PI-31_23	Helianthus annuus	annuus	PI-31	Eubank 1	2019 common garden	NA	0.59518	0.59518
PI-31_3	Helianthus annuus	annuus	PI-31	Eubank 1	2019 common garden	NA	0.53957	0.53957
PI-32_10	Helianthus annuus	annuus	PI-32	Eubank 2	2019 common garden	NA	0.363096	0.363096
PI-32_11	Helianthus annuus	annuus	PI-32	Eubank 2	2019 common garden	NA	0.295701	0.295701
PI-32_12	Helianthus annuus	annuus	PI-32	Eubank 2	2019 common garden	NA	0.312711	0.312711
PI-32_21	Helianthus annuus	annuus	PI-32	Eubank 2	2019 common garden	NA	0.271328	0.271328
PI-32_22	Helianthus annuus	annuus	PI-32	Eubank 2	2019 common garden	NA	0.402528	0.402528
PI-32_23	Helianthus annuus	annuus	PI-32	Eubank 2	2019 common garden	NA	0.389244	0.389244
PI-32_27	Helianthus annuus	annuus	PI-32	Eubank 2	2019 common garden	NA	0.366147	0.366147
PI-32_28	Helianthus annuus	annuus	PI-32	Eubank 2	2019 common garden	NA	0.326148	0.326148
PI-32_3	Helianthus annuus	annuus	PI-32	Eubank 2	2019 common garden	NA	0.197959	0.197959
PI-32_5	Helianthus annuus	annuus	PI-32	Eubank 2	2019 common garden	NA	0.338913	0.338913
PI-32_7	Helianthus annuus	annuus	PI-32	Eubank 2	2019 common garden	NA	0.305978	0.305978
PI-33_15	Helianthus annuus	annuus	PI-33	20080030	2019 common garden	NA	0.661709	0.548945
PI-33_18	Helianthus annuus	annuus	PI-33	20080030	2019 common garden	NA	0.795632	0.591264
PI-34_1	Helianthus annuus	annuus	PI-34	HEAN3-SOSMT-060-INDIANBUTTE-06	2019 common garden	NA	1	1
PI-34_11	Helianthus annuus	annuus	PI-34	HEAN3-SOSMT-060-INDIANBUTTE-06	2019 common garden	NA	1	1
PI-34_15	Helianthus annuus	annuus	PI-34	HEAN3-SOSMT-060-INDIANBUTTE-06	2019 common garden	NA	1	1
PI-34_37	Helianthus annuus	annuus	PI-34	HEAN3-SOSMT-060-INDIANBUTTE-06	2019 common garden	NA	1	1
PI-34_43	Helianthus annuus	annuus	PI-34	HEAN3-SOSMT-060-INDIANBUTTE-06	2019 common garden	NA	0.76535	0.687133
PI-34_46	Helianthus annuus	annuus	PI-34	HEAN3-SOSMT-060-INDIANBUTTE-06	2019 common garden	NA	1	1
PI-34_5	Helianthus annuus	annuus	PI-34	HEAN3-SOSMT-060-INDIANBUTTE-06	2019 common garden	NA	1	1
PI-34_52	Helianthus annuus	annuus	PI-34	HEAN3-SOSMT-060-INDIANBUTTE-06	2019 common garden	NA	0.852965	0.705931
PI-34_54	Helianthus annuus	annuus	PI-34	HEAN3-SOSMT-060-INDIANBUTTE-06	2019 common garden	NA	0.618098	0.618098
PI-34_55	Helianthus annuus	annuus	PI-34	HEAN3-SOSMT-060-INDIANBUTTE-06	2019 common garden	NA	1	1
PI-35_14	Helianthus annuus	annuus	PI-35	HEAN3-SOS_OR030-166-10	2019 common garden	NA	0.867388	0.734776
PI-35_15	Helianthus annuus	annuus	PI-35	HEAN3-SOS_OR030-166-10	2019 common garden	NA	0.642088	0.642088
PI-35_2	Helianthus annuus	annuus	PI-35	HEAN3-SOS_OR030-166-10	2019 common garden	NA	0.595233	0.595233
PI-35_24	Helianthus annuus	annuus	PI-35	HEAN3-SOS_OR030-166-10	2019 common garden	NA	0.79982	0.59964
PI-35_25	Helianthus annuus	annuus	PI-35	HEAN3-SOS_OR030-166-10	2019 common garden	NA	0.626788	0.626788
PI-35_27	Helianthus annuus	annuus	PI-35	HEAN3-SOS_OR030-166-10	2019 common garden	NA	0.531624	0.531624
PI-35_3	Helianthus annuus	annuus	PI-35	HEAN3-SOS_OR030-166-10	2019 common garden	NA	0.575139	0.575139
PI-35_4	Helianthus annuus	annuus	PI-35	HEAN3-SOS_OR030-166-10	2019 common garden	NA	0.85524	0.71048
PI-35_5	Helianthus annuus	annuus	PI-35	HEAN3-SOS_OR030-166-10	2019 common garden	NA	0.755856	0.674474
PI-35_6	Helianthus annuus	annuus	PI-35	HEAN3-SOS_OR030-166-10	2019 common garden	NA	0.841605	0.68321
PI-35_9	Helianthus annuus	annuus	PI-35	HEAN3-SOS_OR030-166-10	2019 common garden	NA	0.603263	0.603263
PI-36_11	Helianthus annuus	annuus	PI-36	ANN-2755	2019 common garden	NA	0.768833	0.691777
PI-36_15	Helianthus annuus	annuus	PI-36	ANN-2755	2019 common garden	NA	0.673262	0.673262
PI-36_16	Helianthus annuus	annuus	PI-36	ANN-2755	2019 common garden	NA	0.722412	0.722412
PI-36_17	Helianthus annuus	annuus	PI-36	ANN-2755	2019 common garden	NA	0.876201	0.752402
PI-36_20	Helianthus annuus	annuus	PI-36	ANN-2755	2019 common garden	NA	1	1
PI-36_29	Helianthus annuus	annuus	PI-36	ANN-2755	2019 common garden	NA	1	1
PI-36_30	Helianthus annuus	annuus	PI-36	ANN-2755	2019 common garden	NA	0.728504	0.638005
PI-36_4	Helianthus annuus	annuus	PI-36	ANN-2755	2019 common garden	NA	0.64342	0.64342
PI-36_8	Helianthus annuus	annuus	PI-36	ANN-2755	2019 common garden	NA	0.638569	0.638569
PI-37_10	Helianthus annuus	annuus	PI-37	CSST-1	2019 common garden	NA	0.303415	0.303415
PI-37_12	Helianthus annuus	annuus	PI-37	CSST-1	2019 common garden	NA	0.35369	0.35369
PI-37_15	Helianthus annuus	annuus	PI-37	CSST-1	2019 common garden	NA	0.365054	0.365054
PI-37_16	Helianthus annuus	annuus	PI-37	CSST-1	2019 common garden	NA	0.393867	0.393867
PI-37_17	Helianthus annuus	annuus	PI-37	CSST-1	2019 common garden	NA	0.345367	0.345367
PI-37_19	Helianthus annuus	annuus	PI-37	CSST-1	2019 common garden	NA	0.34163	0.34163
PI-37_21	Helianthus annuus	annuus	PI-37	CSST-1	2019 common garden	NA	0.288454	0.288454
PI-37_23	Helianthus annuus	annuus	PI-37	CSST-1	2019 common garden	NA	0.395334	0.395334
PI-37_26	Helianthus annuus	annuus	PI-37	CSST-1	2019 common garden	NA	0.305204	0.305204
PI-37_28	Helianthus annuus	annuus	PI-37	CSST-1	2019 common garden	NA	0.321029	0.321029
PI-37_5	Helianthus annuus	annuus	PI-37	CSST-1	2019 common garden	NA	0.366066	0.366066
PI-37_6	Helianthus annuus	annuus	PI-37	CSST-1	2019 common garden	NA	0.320521	0.320521
PI-39_1	Helianthus annuus	annuus	PI-39	LBBT-1	2019 common garden	NA	0.891066	0.782132
PI-39_10	Helianthus annuus	annuus	PI-39	LBBT-1	2019 common garden	NA	1	1
PI-39_11	Helianthus annuus	annuus	PI-39	LBBT-1	2019 common garden	NA	0.742603	0.656804
PI-39_13	Helianthus annuus	annuus	PI-39	LBBT-1	2019 common garden	NA	0.905959	0.811918
PI-39_14	Helianthus annuus	annuus	PI-39	LBBT-1	2019 common garden	NA	0.75532	0.673759
PI-39_16	Helianthus annuus	annuus	PI-39	LBBT-1	2019 common garden	NA	0.85782	0.71564
PI-39_18	Helianthus annuus	annuus	PI-39	LBBT-1	2019 common garden	NA	0.917379	0.834758
PI-39_2	Helianthus annuus	annuus	PI-39	LBBT-1	2019 common garden	NA	0.702321	0.603094
PI-39_26	Helianthus annuus	annuus	PI-39	LBBT-1	2019 common garden	NA	0.923386	0.846772
PI-39_30	Helianthus annuus	annuus	PI-39	LBBT-1	2019 common garden	NA	0.655143	0.655143
PI-39_4	Helianthus annuus	annuus	PI-39	LBBT-1	2019 common garden	NA	1	1
PI-39_8	Helianthus annuus	annuus	PI-39	LBBT-1	2019 common garden	NA	0.918625	0.83725
PI-4_11	Helianthus annuus	annuus	PI-4	A-1617	2019 common garden	NA	0.602751	0.602751
PI-4_19	Helianthus annuus	annuus	PI-4	A-1617	2019 common garden	NA	0.769775	0.693034
PI-4_2	Helianthus annuus	annuus	PI-4	A-1617	2019 common garden	NA	0.461937	0.461937
PI-4_25	Helianthus annuus	annuus	PI-4	A-1617	2019 common garden	NA	0.392225	0.392225
PI-4_29	Helianthus annuus	annuus	PI-4	A-1617	2019 common garden	NA	0.643377	0.524502
PI-4_4	Helianthus annuus	annuus	PI-4	A-1617	2019 common garden	NA	0.796964	0.593927
PI-4_46	Helianthus annuus	annuus	PI-4	A-1617	2019 common garden	NA	0.390905	0.390905
PI-4_7	Helianthus annuus	annuus	PI-4	A-1617	2019 common garden	NA	0.465516	0.465516
PI-4_9	Helianthus annuus	annuus	PI-4	A-1617	2019 common garden	NA	0.416696	0.416696
PI-40_1	Helianthus annuus	annuus	PI-40	ANN-2782	2019 common garden	NA	0.803696	0.738261
PI-40_11	Helianthus annuus	annuus	PI-40	ANN-2782	2019 common garden	NA	0.745607	0.660809
PI-40_17	Helianthus annuus	annuus	PI-40	ANN-2782	2019 common garden	NA	0.889407	0.778815
PI-40_22	Helianthus annuus	annuus	PI-40	ANN-2782	2019 common garden	NA	0.825544	0.767392
PI-40_23	Helianthus annuus	annuus	PI-40	ANN-2782	2019 common garden	NA	0.762026	0.682701
PI-40_26	Helianthus annuus	annuus	PI-40	ANN-2782	2019 common garden	NA	0.75086	0.667814
PI-40_27	Helianthus annuus	annuus	PI-40	ANN-2782	2019 common garden	NA	0.796468	0.728624
PI-40_29	Helianthus annuus	annuus	PI-40	ANN-2782	2019 common garden	NA	0.882912	0.765823
PI-40_36	Helianthus annuus	annuus	PI-40	ANN-2782	2019 common garden	NA	1	1
PI-40_4	Helianthus annuus	annuus	PI-40	ANN-2782	2019 common garden	NA	1	1
PI-40_58	Helianthus annuus	annuus	PI-40	ANN-2782	2019 common garden	NA	1	1
PI-6_18	Helianthus annuus	annuus	PI-6	ANN-527	2019 common garden	NA	0.574474	0.574474
PI-6_19	Helianthus annuus	annuus	PI-6	ANN-527	2019 common garden	NA	1	1
PI-6_26	Helianthus annuus	annuus	PI-6	ANN-527	2019 common garden	NA	0.710875	0.6145
PI-6_28	Helianthus annuus	annuus	PI-6	ANN-527	2019 common garden	NA	0.840593	0.681186
PI-6_29	Helianthus annuus	annuus	PI-6	ANN-527	2019 common garden	NA	0.877278	0.754555
PI-6_33	Helianthus annuus	annuus	PI-6	ANN-527	2019 common garden	NA	1	1
PI-6_50	Helianthus annuus	annuus	PI-6	ANN-527	2019 common garden	NA	0.816688	0.633376
PI-7_26	Helianthus annuus	annuus	PI-7	ANN-874	2019 common garden	NA	0.475148	0.475148
PI-7_3	Helianthus annuus	annuus	PI-7	ANN-874	2019 common garden	NA	0.543763	0.543763
PI-7_41	Helianthus annuus	annuus	PI-7	ANN-874	2019 common garden	NA	0.532711	0.532711
PI-7_9	Helianthus annuus	annuus	PI-7	ANN-874	2019 common garden	NA	0.470714	0.470714
PI-9_10	Helianthus annuus	annuus	PI-9	ANN-1200	2019 common garden	NA	0.779005	0.55801
PI-9_11	Helianthus annuus	annuus	PI-9	ANN-1200	2019 common garden	NA	0.583068	0.444091
PI-9_12	Helianthus annuus	annuus	PI-9	ANN-1200	2019 common garden	NA	0.403081	0.403081
PI-9_17	Helianthus annuus	annuus	PI-9	ANN-1200	2019 common garden	NA	0.765944	0.687925
PI-9_18	Helianthus annuus	annuus	PI-9	ANN-1200	2019 common garden	NA	0.443859	0.443859
PI-9_19	Helianthus annuus	annuus	PI-9	ANN-1200	2019 common garden	NA	0.512079	0.512079
PI-9_20	Helianthus annuus	annuus	PI-9	ANN-1200	2019 common garden	NA	0.447683	0.447683
PI-9_23	Helianthus annuus	annuus	PI-9	ANN-1200	2019 common garden	NA	0.425273	0.425273
PI-9_3	Helianthus annuus	annuus	PI-9	ANN-1200	2019 common garden	NA	0.592708	0.456944
PI-9_6	Helianthus annuus	annuus	PI-9	ANN-1200	2019 common garden	NA	0.514129	0.514129
PI-9_7	Helianthus annuus	annuus	PI-9	ANN-1200	2019 common garden	NA	0.447683	0.447683
SD1W-19	Helianthus annuus	annuus	SD1W	ANN_69, SD1W	2019 common garden	NA	0.425273	0.425273
SD1W-2	Helianthus annuus	annuus	SD1W	ANN_69, SD1W	2019 common garden	NA	0.592708	0.456944
SD1W-22	Helianthus annuus	annuus	SD1W	ANN_69, SD1W	2019 common garden	NA	1	1
SD1W-27	Helianthus annuus	annuus	SD1W	ANN_69, SD1W	2019 common garden	NA	0.834064	0.668127
SD1W-31	Helianthus annuus	annuus	SD1W	ANN_69, SD1W	2019 common garden	NA	0.695078	0.593438
SD1W-35	Helianthus annuus	annuus	SD1W	ANN_69, SD1W	2019 common garden	NA	0.536244	0.536244
SD1W-36	Helianthus annuus	annuus	SD1W	ANN_69, SD1W	2019 common garden	NA	1	1
SK1W-13	Helianthus annuus	annuus	SK1W	ANN_71, SK1W	2019 common garden	NA	0.716427	0.621903
SK1W-15	Helianthus annuus	annuus	SK1W	ANN_71, SK1W	2019 common garden	NA	0.701514	0.602019
SK1W-17	Helianthus annuus	annuus	SK1W	ANN_71, SK1W	2019 common garden	NA	0.673965	0.565287
SK1W-21	Helianthus annuus	annuus	SK1W	ANN_71, SK1W	2019 common garden	NA	0.617357	0.617357
SK1W-22	Helianthus annuus	annuus	SK1W	ANN_71, SK1W	2019 common garden	NA	0.645869	0.645869
SK1W-23	Helianthus annuus	annuus	SK1W	ANN_71, SK1W	2019 common garden	NA	0.851592	0.703183
SK1W-25	Helianthus annuus	annuus	SK1W	ANN_71, SK1W	2019 common garden	NA	0.652839	0.652839
SK1W-29	Helianthus annuus	annuus	SK1W	ANN_71, SK1W	2019 common garden	NA	0.525225	0.525225
SK1W-36	Helianthus annuus	annuus	SK1W	ANN_71, SK1W	2019 common garden	NA	0.931712	0.863425
SK1W-39	Helianthus annuus	annuus	SK1W	ANN_71, SK1W	2019 common garden	NA	0.657151	0.542868
PET0431	Helianthus petiolaris	petiolaris	PET_14	DB_1850	2016 common garden	L/S	0.227844
PET0432	Helianthus petiolaris	petiolaris	PET_14	DB_1850	2016 common garden	L/S	0.537917
PET0433	Helianthus petiolaris	petiolaris	PET_14	DB_1850	2016 common garden	S/S	0.320041
PET0434	Helianthus petiolaris	petiolaris	PET_14	DB_1850	2016 common garden	L/L	0.35271
PET0435	Helianthus petiolaris	petiolaris	PET_14	DB_1850	2016 common garden	S/S	0.378716
PET0436	Helianthus petiolaris	petiolaris	PET_14	DB_1850	2016 common garden	L/L	0.543877
PET0437	Helianthus petiolaris	petiolaris	PET_14	DB_1850	2016 common garden	S/S	0.304472
PET0438	Helianthus petiolaris	petiolaris	PET_14	DB_1850	2016 common garden	S/S	0.341273
PET0439	Helianthus petiolaris	petiolaris	PET_14	DB_1850	2016 common garden	S/S	0.201177
PET0440	Helianthus petiolaris	petiolaris	PET_14	DB_1850	2016 common garden	S/S	0.36024
PET0441	Helianthus petiolaris	petiolaris	PET_15	DB_1853	2016 common garden	S/S	0.32853
PET0442	Helianthus petiolaris	petiolaris	PET_15	DB_1853	2016 common garden	S/S	0.40329
PET0443	Helianthus petiolaris	petiolaris	PET_15	DB_1853	2016 common garden	S/S	0.307077
PET0444	Helianthus petiolaris	petiolaris	PET_15	DB_1853	2016 common garden	S/S	0.320273
PET0445	Helianthus petiolaris	petiolaris	PET_15	DB_1853	2016 common garden	S/S	0.382405
PET0446	Helianthus petiolaris	petiolaris	PET_15	DB_1853	2016 common garden	S/S	0.248823
PET0447	Helianthus petiolaris	petiolaris	PET_15	DB_1853	2016 common garden	S/S	0.453072
PET0448	Helianthus petiolaris	petiolaris	PET_15	DB_1853	2016 common garden	S/S	0.429004
PET0449	Helianthus petiolaris	petiolaris	PET_15	DB_1853	2016 common garden	S/S	0.373626
PET0450	Helianthus petiolaris	petiolaris	PET_15	DB_1853	2016 common garden	S/S	0.36677
PET0451	Helianthus petiolaris	petiolaris	PET_16	DB_1855	2016 common garden	S/S	0.220452
PET0452	Helianthus petiolaris	petiolaris	PET_16	DB_1855	2016 common garden	S/S	0.284924
PET0453	Helianthus petiolaris	petiolaris	PET_16	DB_1855	2016 common garden	S/S	0.204819
PET0454	Helianthus petiolaris	petiolaris	PET_16	DB_1855	2016 common garden	S/S	0.226836
PET0455	Helianthus petiolaris	petiolaris	PET_16	DB_1855	2016 common garden	S/S	0.262401
PET0456	Helianthus petiolaris	petiolaris	PET_16	DB_1855	2016 common garden	S/S	0.250034
PET0457	Helianthus petiolaris	petiolaris	PET_16	DB_1855	2016 common garden	S/S	0.251758
PET0458	Helianthus petiolaris	petiolaris	PET_16	DB_1855	2016 common garden	S/S	0.250114
PET0459	Helianthus petiolaris	petiolaris	PET_16	DB_1855	2016 common garden	S/S	0.396636
PET0460	Helianthus petiolaris	petiolaris	PET_16	DB_1855	2016 common garden	S/S	0.339988
PET0461	Helianthus petiolaris	petiolaris	PET_17	DB_1856	2016 common garden	S/S	0.215613
PET0462	Helianthus petiolaris	petiolaris	PET_17	DB_1856	2016 common garden	S/S	0.323529
PET0463	Helianthus petiolaris	petiolaris	PET_17	DB_1856	2016 common garden	S/S	0.315796
PET0464	Helianthus petiolaris	petiolaris	PET_17	DB_1856	2016 common garden	S/S	0.252757
PET0465	Helianthus petiolaris	petiolaris	PET_17	DB_1856	2016 common garden	S/S	0.245989
PET0466	Helianthus petiolaris	petiolaris	PET_17	DB_1856	2016 common garden	S/S	0.208788
PET0467	Helianthus petiolaris	petiolaris	PET_17	DB_1856	2016 common garden	S/S	0.302699
PET0468	Helianthus petiolaris	petiolaris	PET_17	DB_1856	2016 common garden	S/S	0.277457
PET0469	Helianthus petiolaris	petiolaris	PET_17	DB_1856	2016 common garden	L/L	0.219264
PET0470	Helianthus petiolaris	petiolaris	PET_17	DB_1856	2016 common garden	S/S	0.212721
PET0471	Helianthus petiolaris	petiolaris	PET_18	DB_1857	2016 common garden	S/S	NA
PET0472	Helianthus petiolaris	petiolaris	PET_18	DB_1857	2016 common garden	S/S	0.253369
PET0473	Helianthus petiolaris	petiolaris	PET_18	DB_1857	2016 common garden	S/S	0.222126
PET0474	Helianthus petiolaris	petiolaris	PET_18	DB_1857	2016 common garden	S/S	0.263174
PET0475	Helianthus petiolaris	petiolaris	PET_18	DB_1857	2016 common garden	S/S	0.262095
PET0476	Helianthus petiolaris	petiolaris	PET_18	DB_1857	2016 common garden	S/S	0.308504
PET0477	Helianthus petiolaris	petiolaris	PET_18	DB_1857	2016 common garden	S/S	0.276623
PET0478	Helianthus petiolaris	petiolaris	PET_18	DB_1857	2016 common garden	S/S	0.285326
PET0479	Helianthus petiolaris	petiolaris	PET_18	DB_1857	2016 common garden	S/S	0.268137
PET0480	Helianthus petiolaris	petiolaris	PET_18	DB_1857	2016 common garden	S/S	0.288121
PET0481	Helianthus petiolaris	petiolaris	PET_19	DB_1858	2016 common garden	S/S	NA
PET0482	Helianthus petiolaris	petiolaris	PET_19	DB_1858	2016 common garden	S/S	0.267267
PET0483	Helianthus petiolaris	petiolaris	PET_19	DB_1858	2016 common garden	S/S	0.324188
PET0484	Helianthus petiolaris	petiolaris	PET_19	DB_1858	2016 common garden	S/S	0.328672
PET0485	Helianthus petiolaris	petiolaris	PET_19	DB_1858	2016 common garden	S/S	0.186395
PET0486	Helianthus petiolaris	petiolaris	PET_19	DB_1858	2016 common garden	S/S	0.251798
PET0487	Helianthus petiolaris	petiolaris	PET_19	DB_1858	2016 common garden	S/S	0.206447
PET0488	Helianthus petiolaris	petiolaris	PET_19	DB_1858	2016 common garden	L/S	0.207187
PET0489	Helianthus petiolaris	petiolaris	PET_19	DB_1858	2016 common garden	L/S	0.266624
PET0490	Helianthus petiolaris	petiolaris	PET_19	DB_1858	2016 common garden	S/S	0.349972
PET0491	Helianthus petiolaris	petiolaris	PET_20	DB_1859	2016 common garden	S/S	NA
PET0492	Helianthus petiolaris	petiolaris	PET_20	DB_1859	2016 common garden	S/S	0.148307
PET0493	Helianthus petiolaris	petiolaris	PET_20	DB_1859	2016 common garden	S/S	0.189438
PET0494	Helianthus petiolaris	petiolaris	PET_20	DB_1859	2016 common garden	S/S	NA
PET0495	Helianthus petiolaris	petiolaris	PET_20	DB_1859	2016 common garden	S/S	0.243436
PET0496	Helianthus petiolaris	petiolaris	PET_20	DB_1859	2016 common garden	L/S	0.308266
PET0497	Helianthus petiolaris	petiolaris	PET_20	DB_1859	2016 common garden	S/S	0.275755
PET0498	Helianthus petiolaris	petiolaris	PET_20	DB_1859	2016 common garden	S/S	0.296789
PET0499	Helianthus petiolaris	petiolaris	PET_20	DB_1859	2016 common garden	S/S	0.18746
PET0500	Helianthus petiolaris	petiolaris	PET_20	DB_1859	2016 common garden	S/S	0.164856
PET0501	Helianthus petiolaris	petiolaris	PET_21	DB_1860	2016 common garden	S/S	0.216659
PET0502	Helianthus petiolaris	petiolaris	PET_21	DB_1860	2016 common garden	S/S	0.183025
PET0503	Helianthus petiolaris	petiolaris	PET_21	DB_1860	2016 common garden	S/S	0.250906
PET0504	Helianthus petiolaris	petiolaris	PET_21	DB_1860	2016 common garden	S/S	0.29478
PET0505	Helianthus petiolaris	petiolaris	PET_21	DB_1860	2016 common garden	S/S	0.297424
PET0506	Helianthus petiolaris	petiolaris	PET_21	DB_1860	2016 common garden	S/S	0.254926
PET0507	Helianthus petiolaris	petiolaris	PET_21	DB_1860	2016 common garden	S/S	0.163048
PET0508	Helianthus petiolaris	petiolaris	PET_21	DB_1860	2016 common garden	S/S	0.225212
PET0509	Helianthus petiolaris	petiolaris	PET_21	DB_1860	2016 common garden	S/S	NA
PET0510	Helianthus petiolaris	petiolaris	PET_21	DB_1860	2016 common garden	S/S	NA
PET0511	Helianthus petiolaris	petiolaris	PET_22	DB_1862	2016 common garden	S/S	0.172932
PET0512	Helianthus petiolaris	petiolaris	PET_22	DB_1862	2016 common garden	S/S	0.181138
PET0513	Helianthus petiolaris	petiolaris	PET_22	DB_1862	2016 common garden	S/S	0.237365
PET0514	Helianthus petiolaris	petiolaris	PET_22	DB_1862	2016 common garden	S/S	0.204112
PET0515	Helianthus petiolaris	petiolaris	PET_22	DB_1862	2016 common garden	S/S	0.198449
PET0516	Helianthus petiolaris	petiolaris	PET_22	DB_1862	2016 common garden	S/S	0.255039
PET0517	Helianthus petiolaris	petiolaris	PET_22	DB_1862	2016 common garden	S/S	0.275159
PET0518	Helianthus petiolaris	petiolaris	PET_22	DB_1862	2016 common garden	S/S	0.25408
PET0519	Helianthus petiolaris	petiolaris	PET_22	DB_1862	2016 common garden	S/S	0.201972
PET0520	Helianthus petiolaris	petiolaris	PET_22	DB_1862	2016 common garden	S/S	0.231487
PET0521	Helianthus petiolaris	petiolaris	PET_23	DB_1863	2016 common garden	S/S	0.131115
PET0522	Helianthus petiolaris	petiolaris	PET_23	DB_1863	2016 common garden	S/S	0.219446
PET0523	Helianthus petiolaris	petiolaris	PET_23	DB_1863	2016 common garden	S/S	NA
PET0524	Helianthus petiolaris	petiolaris	PET_23	DB_1863	2016 common garden	S/S	0.07283
PET0526	Helianthus petiolaris	petiolaris	PET_23	DB_1863	2016 common garden	S/S	0.184194
PET0527	Helianthus petiolaris	petiolaris	PET_23	DB_1863	2016 common garden	S/S	0.284768
PET0528	Helianthus petiolaris	petiolaris	PET_23	DB_1863	2016 common garden	S/S	0.2158
PET0529	Helianthus petiolaris	petiolaris	PET_23	DB_1863	2016 common garden	S/S	0.22696
PET0530	Helianthus petiolaris	petiolaris	PET_23	DB_1863	2016 common garden	S/S	0.191394
PET0531	Helianthus petiolaris	petiolaris	PET_24	DB_1865	2016 common garden	L/S	0.201505
PET0532	Helianthus petiolaris	petiolaris	PET_24	DB_1865	2016 common garden	S/S	0.249879
PET0534	Helianthus petiolaris	petiolaris	PET_24	DB_1865	2016 common garden	S/S	0.230327
PET0535	Helianthus petiolaris	petiolaris	PET_24	DB_1865	2016 common garden	S/S	0.253958
PET0536	Helianthus petiolaris	petiolaris	PET_24	DB_1865	2016 common garden	S/S	0.299377
PET0537	Helianthus petiolaris	petiolaris	PET_24	DB_1865	2016 common garden	S/S	0.280533
PET0539	Helianthus petiolaris	petiolaris	PET_25	DB_1867	2016 common garden	S/S	0.255411
PET0540	Helianthus petiolaris	petiolaris	PET_25	DB_1867	2016 common garden	S/S	0.269929
PET0541	Helianthus petiolaris	petiolaris	PET_25	DB_1867	2016 common garden	S/S	0.314057
PET0542	Helianthus petiolaris	petiolaris	PET_25	DB_1867	2016 common garden	S/S	0.175504
PET0543	Helianthus petiolaris	petiolaris	PET_25	DB_1867	2016 common garden	S/S	0.18072
PET0544	Helianthus petiolaris	petiolaris	PET_25	DB_1867	2016 common garden	S/S	0.302095
PET0545	Helianthus petiolaris	petiolaris	PET_25	DB_1867	2016 common garden	S/S	0.261889
PET0546	Helianthus petiolaris	petiolaris	PET_25	DB_1867	2016 common garden	S/S	0.259624
PET0547	Helianthus petiolaris	petiolaris	PET_25	DB_1867	2016 common garden	S/S	0.23734
PET0548	Helianthus petiolaris	petiolaris	PET_25	DB_1867	2016 common garden	L/S	0.227896
PET0549	Helianthus petiolaris	petiolaris	PET_26	DB_1868	2016 common garden	S/S	0.196039
PET0550	Helianthus petiolaris	petiolaris	PET_26	DB_1868	2016 common garden	S/S	NA
PET0552	Helianthus petiolaris	petiolaris	PET_26	DB_1868	2016 common garden	S/S	NA
PET0553	Helianthus petiolaris	petiolaris	PET_26	DB_1868	2016 common garden	S/S	0.241111
PET0554	Helianthus petiolaris	petiolaris	PET_26	DB_1868	2016 common garden	S/S	0.217836
PET0555	Helianthus petiolaris	petiolaris	PET_26	DB_1868	2016 common garden	L/L	0.182744
PET0556	Helianthus petiolaris	petiolaris	PET_26	DB_1868	2016 common garden	S/S	0.113264
PET0557	Helianthus petiolaris	petiolaris	PET_26	DB_1868	2016 common garden	S/S	0.153913
PET0558	Helianthus petiolaris	petiolaris	PET_26	DB_1868	2016 common garden	S/S	0.173749
PET0559	Helianthus petiolaris	petiolaris	PET_27	DB_1869	2016 common garden	S/S	0.133865
PET0560	Helianthus petiolaris	petiolaris	PET_27	DB_1869	2016 common garden	S/S	0.133747
PET0561	Helianthus petiolaris	petiolaris	PET_27	DB_1869	2016 common garden	S/S	0.204531
PET0562	Helianthus petiolaris	petiolaris	PET_27	DB_1869	2016 common garden	S/S	0.149988
PET0563	Helianthus petiolaris	petiolaris	PET_27	DB_1869	2016 common garden	S/S	0.259307
PET0564	Helianthus petiolaris	petiolaris	PET_27	DB_1869	2016 common garden	S/S	0.108416
PET0565	Helianthus petiolaris	petiolaris	PET_27	DB_1869	2016 common garden	S/S	0.217646
PET0566	Helianthus petiolaris	petiolaris	PET_27	DB_1869	2016 common garden	S/S	0.137891
PET0568	Helianthus petiolaris	petiolaris	PET_27	DB_1869	2016 common garden	S/S	0.107134
PET0569	Helianthus petiolaris	petiolaris	PET_28	DB_1870	2016 common garden	S/S	0.0373606
PET0570	Helianthus petiolaris	petiolaris	PET_28	DB_1870	2016 common garden	S/S	0.126012
PET0571	Helianthus petiolaris	petiolaris	PET_28	DB_1870	2016 common garden	S/S	0.289939
PET0572	Helianthus petiolaris	petiolaris	PET_28	DB_1870	2016 common garden	S/S	0.228807
PET0573	Helianthus petiolaris	petiolaris	PET_28	DB_1870	2016 common garden	S/S	0.132484
PET0574	Helianthus petiolaris	petiolaris	PET_28	DB_1870	2016 common garden	S/S	0.136763
PET0575	Helianthus petiolaris	petiolaris	PET_28	DB_1870	2016 common garden	S/S	0.104871
PET0576	Helianthus petiolaris	petiolaris	PET_28	DB_1870	2016 common garden	S/S	0.203502
PET0578	Helianthus petiolaris	petiolaris	PET_28	DB_1870	2016 common garden	S/S	0.272188
PET0579	Helianthus petiolaris	petiolaris	PET_29	DB_1872	2016 common garden	S/S	0.0791457
PET0580	Helianthus petiolaris	petiolaris	PET_29	DB_1872	2016 common garden	S/S	0.125724
PET0581	Helianthus petiolaris	petiolaris	PET_29	DB_1872	2016 common garden	S/S	0.220651
PET0582	Helianthus petiolaris	petiolaris	PET_29	DB_1872	2016 common garden	S/S	0.27231
PET0583	Helianthus petiolaris	petiolaris	PET_29	DB_1872	2016 common garden	S/S	0.251083
PET0584	Helianthus petiolaris	petiolaris	PET_29	DB_1872	2016 common garden	S/S	0.218369
PET0586	Helianthus petiolaris	petiolaris	PET_29	DB_1872	2016 common garden	S/S	0.171205
PET0587	Helianthus petiolaris	petiolaris	PET_29	DB_1872	2016 common garden	S/S	0.192639
PET0588	Helianthus petiolaris	petiolaris	PET_29	DB_1872	2016 common garden	S/S	0.209016
PET0589	Helianthus petiolaris	petiolaris	PET_30	DB_1873	2016 common garden	S/S	0.231554
PET0590	Helianthus petiolaris	petiolaris	PET_30	DB_1873	2016 common garden	S/S	0.238052
PET0591	Helianthus petiolaris	petiolaris	PET_30	DB_1873	2016 common garden	S/S	0.129912
PET0592	Helianthus petiolaris	petiolaris	PET_30	DB_1873	2016 common garden	S/S	0.1004
PET0593	Helianthus petiolaris	petiolaris	PET_30	DB_1873	2016 common garden	S/S	0.290517
PET0595	Helianthus petiolaris	petiolaris	PET_30	DB_1873	2016 common garden	S/S	0.22781
PET0596	Helianthus petiolaris	petiolaris	PET_30	DB_1873	2016 common garden	S/S	0.238402
PET0597	Helianthus petiolaris	petiolaris	PET_30	DB_1873	2016 common garden	S/S	0.189979
PET0598	Helianthus petiolaris	petiolaris	PET_30	DB_1873	2016 common garden	S/S	0.200266
PET0599	Helianthus petiolaris	petiolaris	PET_31	DB_1874	2016 common garden	S/S	0.23995
PET0600	Helianthus petiolaris	petiolaris	PET_31	DB_1874	2016 common garden	S/S	0.129997
PET0602	Helianthus petiolaris	petiolaris	PET_31	DB_1874	2016 common garden	S/S	0.217257
PET0603	Helianthus petiolaris	petiolaris	PET_31	DB_1874	2016 common garden	S/S	0.216457
PET0604	Helianthus petiolaris	petiolaris	PET_31	DB_1874	2016 common garden	S/S	0.152556
PET0605	Helianthus petiolaris	petiolaris	PET_31	DB_1874	2016 common garden	S/S	0.213019
PET0606	Helianthus petiolaris	petiolaris	PET_31	DB_1874	2016 common garden	S/S	0.170051
PET0607	Helianthus petiolaris	petiolaris	PET_31	DB_1874	2016 common garden	S/S	0.180207
PET0301	Helianthus petiolaris	fallax	PET_01	DB_1808	2016 common garden	S/S	0.358899
PET0302	Helianthus petiolaris	fallax	PET_01	DB_1808	2016 common garden	S/S	0.414938
PET0303	Helianthus petiolaris	fallax	PET_01	DB_1808	2016 common garden	S/S	0.399395
PET0304	Helianthus petiolaris	fallax	PET_01	DB_1808	2016 common garden	S/S	0.520512
PET0305	Helianthus petiolaris	fallax	PET_01	DB_1808	2016 common garden	S/S	0.386781
PET0306	Helianthus petiolaris	fallax	PET_01	DB_1808	2016 common garden	S/S	0.363632
PET0307	Helianthus petiolaris	fallax	PET_01	DB_1808	2016 common garden	S/S	0.508866
PET0308	Helianthus petiolaris	fallax	PET_01	DB_1808	2016 common garden	S/S	0.356253
PET0309	Helianthus petiolaris	fallax	PET_01	DB_1808	2016 common garden	S/S	NA
PET0310	Helianthus petiolaris	fallax	PET_01	DB_1808	2016 common garden	S/S	0.452804
PET0311	Helianthus petiolaris	fallax	PET_02	DB_1810	2016 common garden	S/S	NA
PET0312	Helianthus petiolaris	fallax	PET_02	DB_1810	2016 common garden	S/S	0.302803
PET0313	Helianthus petiolaris	fallax	PET_02	DB_1810	2016 common garden	S/S	0.182716
PET0314	Helianthus petiolaris	fallax	PET_02	DB_1810	2016 common garden	S/S	0.353345
PET0315	Helianthus petiolaris	fallax	PET_02	DB_1810	2016 common garden	S/S	0.177014
PET0316	Helianthus petiolaris	fallax	PET_02	DB_1810	2016 common garden	S/S	0.359863
PET0317	Helianthus petiolaris	fallax	PET_02	DB_1810	2016 common garden	S/S	0.277143
PET0318	Helianthus petiolaris	fallax	PET_02	DB_1810	2016 common garden	S/S	0.305896
PET0319	Helianthus petiolaris	fallax	PET_02	DB_1810	2016 common garden	S/S	0.342707
PET0320	Helianthus petiolaris	fallax	PET_02	DB_1810	2016 common garden	S/S	0.328175
PET0321	Helianthus petiolaris	fallax	PET_03	DB_1812	2016 common garden	S/S	0.475163
PET0322	Helianthus petiolaris	fallax	PET_03	DB_1812	2016 common garden	S/S	0.387442
PET0323	Helianthus petiolaris	fallax	PET_03	DB_1812	2016 common garden	S/S	0.466121
PET0324	Helianthus petiolaris	fallax	PET_03	DB_1812	2016 common garden	S/S	0.538363
PET0325	Helianthus petiolaris	fallax	PET_03	DB_1812	2016 common garden	S/S	0.46361
PET0326	Helianthus petiolaris	fallax	PET_03	DB_1812	2016 common garden	S/S	0.322637
PET0327	Helianthus petiolaris	fallax	PET_03	DB_1812	2016 common garden	S/S	0.410541
PET0328	Helianthus petiolaris	fallax	PET_03	DB_1812	2016 common garden	S/S	0.474625
PET0329	Helianthus petiolaris	fallax	PET_03	DB_1812	2016 common garden	S/S	0.282962
PET0330	Helianthus petiolaris	fallax	PET_03	DB_1812	2016 common garden	S/S	0.400902
PET0331	Helianthus petiolaris	fallax	PET_04	DB_1814	2016 common garden	S/S	0.389672
PET0332	Helianthus petiolaris	fallax	PET_04	DB_1814	2016 common garden	S/S	0.511451
PET0333	Helianthus petiolaris	fallax	PET_04	DB_1814	2016 common garden	S/S	0.413915
PET0334	Helianthus petiolaris	fallax	PET_04	DB_1814	2016 common garden	S/S	0.473149
PET0335	Helianthus petiolaris	fallax	PET_04	DB_1814	2016 common garden	S/S	0.627793
PET0336	Helianthus petiolaris	fallax	PET_04	DB_1814	2016 common garden	S/S	0.360816
PET0337	Helianthus petiolaris	fallax	PET_04	DB_1814	2016 common garden	S/S	0.467728
PET0338	Helianthus petiolaris	fallax	PET_04	DB_1814	2016 common garden	S/S	0.546969
PET0339	Helianthus petiolaris	fallax	PET_04	DB_1814	2016 common garden	S/S	0.529573
PET0340	Helianthus petiolaris	fallax	PET_04	DB_1814	2016 common garden	S/S	0.383252
PET0341	Helianthus petiolaris	fallax	PET_05	DB_1816	2016 common garden	S/S	0.214519
PET0342	Helianthus petiolaris	fallax	PET_05	DB_1816	2016 common garden	S/S	0.240188
PET0343	Helianthus petiolaris	fallax	PET_05	DB_1816	2016 common garden	S/S	0.184037
PET0344	Helianthus petiolaris	fallax	PET_05	DB_1816	2016 common garden	S/S	0.247783
PET0345	Helianthus petiolaris	fallax	PET_05	DB_1816	2016 common garden	S/S	0.213373
PET0346	Helianthus petiolaris	fallax	PET_05	DB_1816	2016 common garden	S/S	0.296753
PET0347	Helianthus petiolaris	fallax	PET_05	DB_1816	2016 common garden	S/S	0.196408
PET0348	Helianthus petiolaris	fallax	PET_05	DB_1816	2016 common garden	S/S	0.276271
PET0349	Helianthus petiolaris	fallax	PET_05	DB_1816	2016 common garden	S/S	NA
PET0350	Helianthus petiolaris	fallax	PET_05	DB_1816	2016 common garden	S/S	NA
PET0351	Helianthus petiolaris	fallax	PET_06	DB_1819	2016 common garden	S/S	0.3438
PET0352	Helianthus petiolaris	fallax	PET_06	DB_1819	2016 common garden	S/S	0.441008
PET0353	Helianthus petiolaris	fallax	PET_06	DB_1819	2016 common garden	S/S	0.0725094
PET0354	Helianthus petiolaris	fallax	PET_06	DB_1819	2016 common garden	S/S	0.4141
PET0355	Helianthus petiolaris	fallax	PET_06	DB_1819	2016 common garden	S/S	0.404255
PET0356	Helianthus petiolaris	fallax	PET_06	DB_1819	2016 common garden	S/S	0.432338
PET0357	Helianthus petiolaris	fallax	PET_06	DB_1819	2016 common garden	S/S	0.515011
PET0358	Helianthus petiolaris	fallax	PET_06	DB_1819	2016 common garden	S/S	0.34596
PET0359	Helianthus petiolaris	fallax	PET_06	DB_1819	2016 common garden	S/S	0.493642
PET0360	Helianthus petiolaris	fallax	PET_06	DB_1819	2016 common garden	S/S	0.476693
PET0361	Helianthus petiolaris	fallax	PET_07	DB_1821	2016 common garden	S/S	0.402206
PET0362	Helianthus petiolaris	fallax	PET_07	DB_1821	2016 common garden	S/S	0.531077
PET0363	Helianthus petiolaris	fallax	PET_07	DB_1821	2016 common garden	S/S	0.518833
PET0364	Helianthus petiolaris	fallax	PET_07	DB_1821	2016 common garden	S/S	0.472036
PET0365	Helianthus petiolaris	fallax	PET_07	DB_1821	2016 common garden	S/S	NA
PET0366	Helianthus petiolaris	fallax	PET_07	DB_1821	2016 common garden	S/S	0.483634
PET0367	Helianthus petiolaris	fallax	PET_07	DB_1821	2016 common garden	S/S	0.43734
PET0368	Helianthus petiolaris	fallax	PET_07	DB_1821	2016 common garden	S/S	0.491726
PET0369	Helianthus petiolaris	fallax	PET_07	DB_1821	2016 common garden	S/S	0.415946
PET0370	Helianthus petiolaris	fallax	PET_07	DB_1821	2016 common garden	S/S	0.48988
PET0371	Helianthus petiolaris	fallax	PET_08	DB_1823	2016 common garden	S/S	0.424762
PET0372	Helianthus petiolaris	fallax	PET_08	DB_1823	2016 common garden	S/S	0.450745
PET0373	Helianthus petiolaris	fallax	PET_08	DB_1823	2016 common garden	S/S	0.439674
PET0374	Helianthus petiolaris	fallax	PET_08	DB_1823	2016 common garden	S/S	0.393282
PET0375	Helianthus petiolaris	fallax	PET_08	DB_1823	2016 common garden	S/S	0.479322
PET0376	Helianthus petiolaris	fallax	PET_08	DB_1823	2016 common garden	S/S	0.423746
PET0377	Helianthus petiolaris	fallax	PET_08	DB_1823	2016 common garden	S/S	0.487342
PET0378	Helianthus petiolaris	fallax	PET_08	DB_1823	2016 common garden	S/S	0.452446
PET0379	Helianthus petiolaris	fallax	PET_08	DB_1823	2016 common garden	S/S	0.535474
PET0380	Helianthus petiolaris	fallax	PET_08	DB_1823	2016 common garden	S/S	0.367482
PET0381	Helianthus petiolaris	fallax	PET_09	DB_1824	2016 common garden	S/S	0.355382
PET0382	Helianthus petiolaris	fallax	PET_09	DB_1824	2016 common garden	S/S	0.455457
PET0383	Helianthus petiolaris	fallax	PET_09	DB_1824	2016 common garden	S/S	NA
PET0384	Helianthus petiolaris	fallax	PET_09	DB_1824	2016 common garden	S/S	0.305787
PET0385	Helianthus petiolaris	fallax	PET_09	DB_1824	2016 common garden	S/S	0.409955
PET0386	Helianthus petiolaris	fallax	PET_09	DB_1824	2016 common garden	S/S	0.374012
PET0387	Helianthus petiolaris	fallax	PET_09	DB_1824	2016 common garden	S/S	0.344063
PET0388	Helianthus petiolaris	fallax	PET_09	DB_1824	2016 common garden	S/S	0.349936
PET0391	Helianthus petiolaris	fallax	PET_10	DB_1825	2016 common garden	S/S	0.381562
PET0392	Helianthus petiolaris	fallax	PET_10	DB_1825	2016 common garden	S/S	0.458378
PET0393	Helianthus petiolaris	fallax	PET_10	DB_1825	2016 common garden	S/S	0.435444
PET0394	Helianthus petiolaris	fallax	PET_10	DB_1825	2016 common garden	S/S	0.355139
PET0395	Helianthus petiolaris	fallax	PET_10	DB_1825	2016 common garden	S/S	0.371647
PET0396	Helianthus petiolaris	fallax	PET_10	DB_1825	2016 common garden	S/S	0.345209
PET0397	Helianthus petiolaris	fallax	PET_10	DB_1825	2016 common garden	S/S	0.438642
PET0398	Helianthus petiolaris	fallax	PET_10	DB_1825	2016 common garden	S/S	NA
PET0399	Helianthus petiolaris	fallax	PET_10	DB_1825	2016 common garden	S/S	NA
PET0400	Helianthus petiolaris	fallax	PET_10	DB_1825	2016 common garden	S/S	0.329884
PET0401	Helianthus petiolaris	fallax	PET_11	DB_1826	2016 common garden	S/S	0.375562
PET0402	Helianthus petiolaris	fallax	PET_11	DB_1826	2016 common garden	S/S	0.444763
PET0403	Helianthus petiolaris	fallax	PET_11	DB_1826	2016 common garden	S/S	0.297008
PET0404	Helianthus petiolaris	fallax	PET_11	DB_1826	2016 common garden	S/S	0.323112
PET0405	Helianthus petiolaris	fallax	PET_11	DB_1826	2016 common garden	S/S	0.354079
PET0406	Helianthus petiolaris	fallax	PET_11	DB_1826	2016 common garden	S/S	0.315849
PET0407	Helianthus petiolaris	fallax	PET_11	DB_1826	2016 common garden	S/S	0.340791
PET0409	Helianthus petiolaris	fallax	PET_11	DB_1826	2016 common garden	S/S	NA
PET0410	Helianthus petiolaris	fallax	PET_11	DB_1826	2016 common garden	S/S	NA
PET0412	Helianthus petiolaris	fallax	PET_12	DB_1840	2016 common garden	S/S	0.306742
PET0413	Helianthus petiolaris	fallax	PET_12	DB_1840	2016 common garden	S/S	0.253363
PET0414	Helianthus petiolaris	fallax	PET_12	DB_1840	2016 common garden	S/S	0.314358
PET0415	Helianthus petiolaris	fallax	PET_12	DB_1840	2016 common garden	S/S	0.203134
PET0416	Helianthus petiolaris	fallax	PET_12	DB_1840	2016 common garden	S/S	0.339519
PET0417	Helianthus petiolaris	fallax	PET_12	DB_1840	2016 common garden	S/S	0.244855
PET0418	Helianthus petiolaris	fallax	PET_12	DB_1840	2016 common garden	S/S	0.220108
PET0419	Helianthus petiolaris	fallax	PET_12	DB_1840	2016 common garden	S/S	NA
PET0420	Helianthus petiolaris	fallax	PET_12	DB_1840	2016 common garden	S/S	NA
PET0421	Helianthus petiolaris	fallax	PET_13	DB_1842	2016 common garden	S/S	0.34029
PET0422	Helianthus petiolaris	fallax	PET_13	DB_1842	2016 common garden	S/S	0.343956
PET0423	Helianthus petiolaris	fallax	PET_13	DB_1842	2016 common garden	S/S	NA
PET0424	Helianthus petiolaris	fallax	PET_13	DB_1842	2016 common garden	S/S	0.176104
PET0425	Helianthus petiolaris	fallax	PET_13	DB_1842	2016 common garden	S/S	0.215328
PET0427	Helianthus petiolaris	fallax	PET_13	DB_1842	2016 common garden	S/S	0.232271
PET0428	Helianthus petiolaris	fallax	PET_13	DB_1842	2016 common garden	S/S	NA
PET0429	Helianthus petiolaris	fallax	PET_13	DB_1842	2016 common garden	S/S	0.225329
PET0430	Helianthus petiolaris	fallax	PET_13	DB_1842	2016 common garden	S/S	0.210395
PET0609	Helianthus petiolaris	fallax	PET_32	DB_1922	2016 common garden	S/S	0.315163
PET0610	Helianthus petiolaris	fallax	PET_32	DB_1922	2016 common garden	S/S	0.33433
PET0611	Helianthus petiolaris	fallax	PET_32	DB_1922	2016 common garden	S/S	0.346727
PET0612	Helianthus petiolaris	fallax	PET_32	DB_1922	2016 common garden	S/S	0.316645
PET0613	Helianthus petiolaris	fallax	PET_32	DB_1922	2016 common garden	S/S	0.190611
PET0614	Helianthus petiolaris	fallax	PET_32	DB_1922	2016 common garden	S/S	0.191591
PET0615	Helianthus petiolaris	fallax	PET_32	DB_1922	2016 common garden	S/S	0.299725
PET0616	Helianthus petiolaris	fallax	PET_32	DB_1922	2016 common garden	S/S	0.316981
PET0617	Helianthus petiolaris	fallax	PET_32	DB_1922	2016 common garden	S/S	0.396278
PET0618	Helianthus petiolaris	fallax	PET_33	DB_1923	2016 common garden	S/S	0.385409
PET0619	Helianthus petiolaris	fallax	PET_33	DB_1923	2016 common garden	S/S	0.502078
PET0620	Helianthus petiolaris	fallax	PET_33	DB_1923	2016 common garden	S/S	0.357987
PET0621	Helianthus petiolaris	fallax	PET_33	DB_1923	2016 common garden	S/S	0.298593
PET0622	Helianthus petiolaris	fallax	PET_33	DB_1923	2016 common garden	S/S	0.284855
PET0623	Helianthus petiolaris	fallax	PET_33	DB_1923	2016 common garden	S/S	0.364475
PET0624	Helianthus petiolaris	fallax	PET_33	DB_1923	2016 common garden	S/S	0.409587
PET0625	Helianthus petiolaris	fallax	PET_33	DB_1923	2016 common garden	S/S	0.232174
PET0626	Helianthus petiolaris	fallax	PET_33	DB_1923	2016 common garden	S/S	0.378997
PET0627	Helianthus petiolaris	fallax	PET_33	DB_1923	2016 common garden	S/S	0.351614
PET0628	Helianthus petiolaris	fallax	PET_34	DB_1925	2016 common garden	S/S	0.300478
PET0629	Helianthus petiolaris	fallax	PET_34	DB_1925	2016 common garden	S/S	NA
PET0630	Helianthus petiolaris	fallax	PET_34	DB_1925	2016 common garden	S/S	NA
PET0631	Helianthus petiolaris	fallax	PET_34	DB_1925	2016 common garden	S/S	NA
PET0632	Helianthus petiolaris	fallax	PET_34	DB_1925	2016 common garden	S/S	NA
PET0633	Helianthus petiolaris	fallax	PET_34	DB_1925	2016 common garden	S/S	0.0238058
PET0634	Helianthus petiolaris	fallax	PET_34	DB_1925	2016 common garden	S/S	0.302128
PET0635	Helianthus petiolaris	fallax	PET_34	DB_1925	2016 common garden	S/S	0.322819
PET0636	Helianthus petiolaris	fallax	PET_34	DB_1925	2016 common garden	S/S	0.386213
PET0637	Helianthus petiolaris	fallax	PET_34	DB_1925	2016 common garden	S/S	0.31213
PET0638	Helianthus petiolaris	fallax	PET_35	DB_1926	2016 common garden	S/S	NA
PET0639	Helianthus petiolaris	fallax	PET_35	DB_1926	2016 common garden	S/S	0.234182
PET0640	Helianthus petiolaris	fallax	PET_35	DB_1926	2016 common garden	S/S	0.4098
PET0641	Helianthus petiolaris	fallax	PET_35	DB_1926	2016 common garden	S/S	0.240232
PET0642	Helianthus petiolaris	fallax	PET_35	DB_1926	2016 common garden	S/S	0.295859
PET0643	Helianthus petiolaris	fallax	PET_35	DB_1926	2016 common garden	S/S	0.283495
PET0644	Helianthus petiolaris	fallax	PET_35	DB_1926	2016 common garden	S/S	0.273613
PET0645	Helianthus petiolaris	fallax	PET_35	DB_1926	2016 common garden	S/S	0.309637
PET0646	Helianthus petiolaris	fallax	PET_35	DB_1926	2016 common garden	S/S	0.186555
PET0647	Helianthus petiolaris	fallax	PET_35	DB_1926	2016 common garden	S/S	0.339298
PET0718	Helianthus petiolaris	fallax	PET_43	DB_1937	2016 common garden	S/S	0.334179
PET0719	Helianthus petiolaris	fallax	PET_43	DB_1937	2016 common garden	S/S	0.265401
PET0720	Helianthus petiolaris	fallax	PET_43	DB_1937	2016 common garden	S/S	0.362202
PET0721	Helianthus petiolaris	fallax	PET_43	DB_1937	2016 common garden	S/S	0.311996
PET0722	Helianthus petiolaris	fallax	PET_43	DB_1937	2016 common garden	S/S	0.338897
PET0723	Helianthus petiolaris	fallax	PET_43	DB_1937	2016 common garden	S/S	0.242172
PET0724	Helianthus petiolaris	fallax	PET_43	DB_1937	2016 common garden	S/S	0.271992
PET0725	Helianthus petiolaris	fallax	PET_43	DB_1937	2016 common garden	S/S	0.274033
PET0726	Helianthus petiolaris	fallax	PET_43	DB_1937	2016 common garden	S/S	0.32314
PET0727	Helianthus petiolaris	fallax	PET_43	DB_1937	2016 common garden	S/S	0.259066
PET0748	Helianthus petiolaris	fallax	PET_46	DB_1943	2016 common garden	S/S	0.101271
PET0749	Helianthus petiolaris	fallax	PET_46	DB_1943	2016 common garden	S/S	0.251762
PET0750	Helianthus petiolaris	fallax	PET_46	DB_1943	2016 common garden	S/S	0.12263
PET0751	Helianthus petiolaris	fallax	PET_46	DB_1943	2016 common garden	S/S	0.116885
PET0752	Helianthus petiolaris	fallax	PET_46	DB_1943	2016 common garden	S/S	0
PET0753	Helianthus petiolaris	fallax	PET_46	DB_1943	2016 common garden	S/S	0.151434
PET0754	Helianthus petiolaris	fallax	PET_46	DB_1943	2016 common garden	S/S	0.0878244
PET0755	Helianthus petiolaris	fallax	PET_46	DB_1943	2016 common garden	S/S	0.17967
PET0756	Helianthus petiolaris	fallax	PET_46	DB_1943	2016 common garden	S/S	0.0816025
PET0757	Helianthus petiolaris	fallax	PET_46	DB_1943	2016 common garden	S/S	0.127863
PET0758	Helianthus petiolaris	fallax	PET_47	DB_1944	2016 common garden	S/S	0.10713
PET0759	Helianthus petiolaris	fallax	PET_47	DB_1944	2016 common garden	S/S	0.105805
PET0760	Helianthus petiolaris	fallax	PET_47	DB_1944	2016 common garden	S/S	NA
PET0761	Helianthus petiolaris	fallax	PET_47	DB_1944	2016 common garden	S/S	0.13019
PET0762	Helianthus petiolaris	fallax	PET_47	DB_1944	2016 common garden	S/S	NA
PET0763	Helianthus petiolaris	fallax	PET_47	DB_1944	2016 common garden	S/S	0.109817
[truncated: 714 more rows]

## Sheet: LUVp species comparisons
Pairwise comparisons of LUVp values distributions between sunflower species (Tukey HSD)
Comparison	Difference	95% confidence interval, lower boundary	95% confidence interval, upper boundary	p-value, adjusted*
H. petiolaris - H. annuus	-0.34382	-0.379776	-0.307863	0
H. argophyllus - H. annuus	-0.353712	-0.415166	-0.292257	0
H. niveus - H. annuus	-0.47032	-0.565674	-0.374965	0
SAM - H. annuus	-0.0386443	-0.0784671	0.00117843	0.0621425
H. argophyllus - H. petiolaris	-0.00989215	-0.0777455	0.0579612	0.994715
H. niveus - H. petiolaris	-0.1265	-0.226099	-0.0269008	0.0048581
SAM - H. petiolaris	0.305175	0.25605	0.354301	0
H. niveus - H. argophyllus	-0.116608	-0.22798	-0.00523561	0.0348403
SAM - H. argophyllus	0.315067	0.245088	0.385047	0
SAM - H. niveus	0.431675	0.330616	0.532734	0
SAM = Sunflower Association Mapping population (cultivated H. annuus)
* The Tukey HSD function in R only reports p-values larger than 10-8

## Sheet: LUVp by genotypic classes
LUVp values (mean ± st.dev.) for genotypic classes for the Chr15_LUVp SNP in H. annuus, with or without considering partial UV absorbance in the tip of ligules (see "Methods section - Ultraviolet and infrared photography" for details)
Chr15_LUVp SNP	LUVp	LUVp (excluding partially UV-absorbing ligule tips)
L/L	0.7842 ± 0.1650	0.7295 ± 0.1830
L/S	0.5926 ± 0.1839	0.5496 ± 0.1649
S/S	0.3267 ± 0.1471	0.3222 ± 0.1385
