# Supplementary material for: Genetic basis and dual adaptive role of floral pigmentation in sunflowers
Source: eLife. 2022 Jan 18;11:e72072. doi: 10.7554/eLife.72072 (PMC8765750; doi:10.7554/eLife.72072)
Supplement: Figure 3—source data 2. [file elife-72072-fig3-data2.xlsx]

## Sheet: AtMYB111 RNAseq
Figure 3 - source data 2: Expression analyses in sunflower and Arabidopsis.
AtMYB111 expression data in tissues of Arabidopsis thaliana Col-0. RNAseq data from Klepikova et al., The Plant Journal 2016).
Tissue	AtMYB111 expression levels, RPKM
Leaf	0.32
Internode	0.82
Sepal	0.42
Petal	45.43
Pedicel	6.18
Stamen	6
Anther	0.06
Carpel	9.38
Silique	0.41
Seed	0

## Sheet: HaMYB111 RNAseq
HaMYB111 expression data in tissues of cultivated H, annuus XRQ. RNAseq data from Badouin et al., Nature 2017).
Tissue	AtMYB111 expression levels, RPKM
Leaves	0.199
Stem	0.101
Bract	0.063
Ligule	4.783
Corolla	0.187
Stamen	0
Pollen	0
Style	0
Ovary	0
Seed	0

## Sheet: qRTs, ligule parts
Expression data for UV-absorbing and UV-reflecting parts of developing and mature ligules.
Individual	Population of origin	Country of origin	Location of origin	Tissue	Developmental stage	Normalized HaMYB111 expression (average of three technical replicates)	Normalized HaFLS1 expression (average of three technical replicates)
ANN1022_GH2018	ANN_23	United States	Nevada	Ligule base	Developing	1.47235	3.54045
ANN1022_GH2018	ANN_23	United States	Nevada	Ligule base	Developing	0.237607	0.19147
ANN1022_GH2018	ANN_23	United States	Nevada	Ligule base	Developing	0.701833	0.928872
ANN1022_GH2018	ANN_23	United States	Nevada	Ligule tip	Developing	0.540417	1.25756
ANN1022_GH2018	ANN_23	United States	Nevada	Ligule tip	Developing	0.0210208	0.0259467
ANN1022_GH2018	ANN_23	United States	Nevada	Ligule tip	Developing	0.0535531	0.056265
ANN1022_GH2018	ANN_23	United States	Nevada	Ligule base	Mature	0.0141735	0.126298
ANN1022_GH2018	ANN_23	United States	Nevada	Ligule base	Mature	0.0108343	0.0864646
ANN1022_GH2018	ANN_23	United States	Nevada	Ligule base	Mature	0.00257509	0.0619904
ANN1022_GH2018	ANN_23	United States	Nevada	Ligule tip	Mature	0.000369451	0.0387578
ANN1022_GH2018	ANN_23	United States	Nevada	Ligule tip	Mature	0.0912126	0.0262042
ANN1022_GH2018	ANN_23	United States	Nevada	Ligule tip	Mature	0.000596942	0.0233536
PET0624_GH2018	PET_33	United States	Arizona	Ligule base	Developing	1.75685	0.615388
PET0624_GH2018	PET_33	United States	Arizona	Ligule base	Developing	0.941114	0.241936
PET0624_GH2018	PET_33	United States	Arizona	Ligule base	Developing	0.890251	0.481885
PET0624_GH2018	PET_33	United States	Arizona	Ligule tip	Developing	0.0064327	0.0285783
PET0624_GH2018	PET_33	United States	Arizona	Ligule tip	Developing	0.075416	0.018744
PET0624_GH2018	PET_33	United States	Arizona	Ligule tip	Developing	0.000742165	0.00771313
PET0624_GH2018	PET_33	United States	Arizona	Ligule base	Mature	0.00113924	0.00313073
PET0624_GH2018	PET_33	United States	Arizona	Ligule base	Mature	0.0246612	0.0323274
PET0624_GH2018	PET_33	United States	Arizona	Ligule base	Mature	0.00696301	0.00994305
PET0624_GH2018	PET_33	United States	Arizona	Ligule tip	Mature	0.000338722	0.00114368
PET0624_GH2018	PET_33	United States	Arizona	Ligule tip	Mature	0.0156385	0.00242908
PET0624_GH2018	PET_33	United States	Arizona	Ligule tip	Mature	0.00490315	0.00950213

## Sheet: qRTs, full ligules
Expression data for full, developing ligules from wild H. annuus individuals with contrasting ligule UV patterns, grown in a common garder in the summer of 2019.
Individual	Population of origin	Country of origin	Location of origin	LUVp categoy	Normalized HaMYB111 expression (average of three technical replicates)	Genotype_at_Chr15_LUVp_SNP	LUVp	LUVp (excluding partially UV-absorbing ligule tips)
1797-10	ANN_03	United States	California	Large	1.93146	L/L	0.946767	0.893534
1797-2	ANN_03	United States	California	Large	0.78453	L/L	1	1
1797-9	ANN_03	United States	California	Large	4.02057	L/L	0.859857	0.719715
1805-10	ANN_10	United States	California	Large	3.01595	L/L	1	1
1805-13	ANN_10	United States	California	Large	1.85134	L/L	1	1
1805-19	ANN_10	United States	California	Large	1.07089	L/L	1	1
1805-3	ANN_10	United States	California	Large	5.0984	L/L	1	1
1815-1	ANN_15	United States	Arizona	Large	6.85863	L/L	0.908106	0.816213
1815-12	ANN_15	United States	Arizona	Large	0.781942	NA	1	1
1815-25	ANN_15	United States	Arizona	Large	0.752775	L/L	0.94108	0.88216
1815-30	ANN_15	United States	Arizona	Large	0.197941	L/L	1	1
1817-8	ANN_16	United States	New Mexico	Large	0.448891	L/L	1	1
1847-4	ANN_32	United States	Utah	Large	0.161003	L/L	1	1
PI-10_22	PI-10	United States	Texas	Large	3.46881	NA	1	1
PI-34_55	PI-34	United States	Montana	Large	2.50389	L/L	1	1
PI-36_20	PI-36	United States	New Mexico	Large	6.73136	L/L	1	1
PI-36_29	PI-36	United States	New Mexico	Large	0.565773	L/L	1	1
PI-39_10	PI-39	United States	Texas	Large	1.00118	L/L	1	1
PI-39_18	PI-39	United States	Texas	Large	0.962608	L/L	0.917379	0.834758
PI-39_4	PI-39	United States	Texas	Large	4.57997	L/S	1	1
PI-40_22	PI-40	United States	California	Large	2.28147	L/L	0.825544	0.767392
PI-40_36	PI-40	United States	California	Large	3.12559	L/L	1	1
PI-40_4	PI-40	United States	California	Large	0.517658	L/L	1	1
PI-40_58	PI-40	United States	California	Large	0.149585	L/L	1	1
1880-12	ANN_44	United States	Texas	Small	0.622298	S/S	0.17279	0.17279
1880-3	ANN_44	United States	Texas	Small	0.81166	S/S	0.295187	0.295187
1881-10	ANN_45	United States	Texas	Small	2.84559	S/S	0.307575	0.307575
1881-15	ANN_45	United States	Texas	Small	1.08416	S/S	0.218319	0.218319
1881-17	ANN_45	United States	Texas	Small	1.61132	S/S	0.247646	0.247646
1883-12	1883	Mexico	Coahulla	Small	0.363243	S/S	0.174144	0.174144
1883-15	1883	Mexico	Coahulla	Small	0.610338	S/S	0.189138	0.189138
1883-8	1883	Mexico	Coahulla	Small	0.500426	S/S	0.146718	0.146718
1890-13	1890	Mexico	Coahulla	Small	1.13045	S/S	0.191179	0.191179
1890-6	1890	Mexico	Coahulla	Small	1.20999	S/S	0.224173	0.224173
1920-25	ANN_47	United States	Arizona	Small	0.675693	L/S	0.260972	0.260972
1920-26	ANN_47	United States	Arizona	Small	2.03435	S/S	0.311641	0.311641
1951-4	ANN_54	United States	Texas	Small	0.677983	S/S	0.200221	0.200221
1954-28	ANN_55	United States	Texas	Small	0.565039	S/S	0.157398	0.157398
1968-1	ANN_57	United States	Texas	Small	0.34204	S/S	0.137879	0.137879
1968-5	ANN_57	United States	Texas	Small	0.558725	S/S	0.0342698	0.0342698
1968-12	ANN_57	United States	Texas	Small	0.458332	S/S	0.239607	0.239607
1976-2	ANN_59	United States	Texas	Small	1.18037	S/S	0.195169	0.195169
1976-3	ANN_59	United States	Texas	Small	1.06017	S/S	0.199754	0.199754
1990-1	ANN_61	United States	Texas	Small	1.41691	S/S	0.325141	0.325141
1990-21	ANN_61	United States	Texas	Small	1.1966	S/S	0.238876	0.238876
1990-24	ANN_61	United States	Texas	Small	0.779194	S/S	0.162808	0.162808
Correlations between HaMYB111 expression levels and different variables (linear regressions)
					Min	1Q	Median	3Q	Max	R2	P
HaMYB111 exp ~ LUVp category					-2.053	-1.0103	-0.2906	0.397	4.656	0.1231	0.0097
HaMYB111 exp ~ LUVp					-2.0822	-1.0016	-0.261	0.3096	4.7703	0.1213	0.0102
HaMYB111 exp ~ Chr15_LUVp SNP					-1.9962	-0.961	-0.2835	0.3599	4.7129	0.0884	0.0282
