# Supplementary material for: Genetic basis and dual adaptive role of floral pigmentation in sunflowers
Source: eLife. 2022 Jan 18;11:e72072. doi: 10.7554/eLife.72072 (PMC8765750; doi:10.7554/eLife.72072)
Supplement: Figure 4—source data 1. [file elife-72072-fig4-data1.xlsx]

## Sheet: 2017 experiment
Figure 4 - source data 1: Pollinator experiment data.
LUVp	Visits_per_12_minutes_interval	Visits_per_minute
Large	3	0.25
Large	2	0.166667
Large	6	0.5
Large	4	0.333333
Large	7	0.583333
Large	8	0.666667
Large	10	0.833333
Large	5	0.416667
Large	9	0.75
Large	4	0.333333
Large	8	0.666667
Large	11	0.916667
Large	6	0.5
Large	6	0.5
Small	1	0.0833333
Small	3	0.25
Small	1	0.0833333
Small	2	0.166667
Small	2	0.166667
Small	3	0.25
Small	7	0.583333
Small	6	0.5
Small	8	0.666667
Small	4	0.333333
Small	5	0.416667
Small	5	0.416667
Small	5	0.416667
Small	2	0.166667

## Sheet: 2019 experiment
Individual	Observer	LUVp	LUVp category	LUVp subcategory	Date	Number of flowers	Start time	Weather	Duration of observation	Bees disk	Bees ray	Bees back	Bumblebees disk	Bumblebees ray	Bumblebees back	Megachile disk	Megachile ray	Megachile back	Other disk	Other ray	Other back	Total all	Total bees	Total bumblebees	Total megachile	Total other	Visits per minute all	Visits per minute bees	Visits per minute bumblebess	Visits per minute megachile	Visits per minute other
1976_8	M	0.147711	Small	LUVp_0_15	29_07_2019	2	09:16:00	sun	5	2	0	0	0	0	0	0	0	0	0	0	0	2	2	0	0	0	0.4	0.4	0	0	0
1976_19	A	0.0835174	Small	LUVp_0_15	06_08_2019	2	09:50:00	sun	5	2	0	0	0	0	0	0	0	0	0	0	0	2	2	0	0	0	0.4	0.4	0	0	0
1976_8	A	0.147711	Small	LUVp_0_15	07_08_2019	3	09:54:00	sun	5	7	1	0	0	0	0	0	0	0	0	0	0	8	8	0	0	0	1.6	1.6	0	0	0
1976_19	M	0.0835174	Small	LUVp_0_15	07_08_2019	2	10:10:00	sun	5	1	1	0	0	0	0	0	0	0	0	0	0	2	2	0	0	0	0.4	0.4	0	0	0
1976_8	M	0.147711	Small	LUVp_0_15	29_07_2019	2	11:27:00	sun	5	2	0	0	0	0	0	0	0	0	0	0	0	2	2	0	0	0	0.4	0.4	0	0	0
1976_8	M	0.147711	Small	LUVp_0_15	29_07_2019	2	13:15:00	sun	5	0	0	0	0	0	0	0	0	0	0	0	0	0	0	0	0	0	0	0	0	0	0
1976_19	A	0.0835174	Small	LUVp_0_15	06_08_2019	2	13:38:00	sun	5	1	0	0	0	0	0	0	0	0	0	0	0	1	1	0	0	0	0.2	0.2	0	0	0
1976_8	O	0.147711	Small	LUVp_0_15	31_07_2019	3	13:44:00	sun/overcast	5	1	2	0	1	0	0	0	0	0	0	0	0	4	3	1	0	0	0.8	0.6	0.2	0	0
1976_19	E	0.0835174	Small	LUVp_0_15	31_07_2019	2	13:45:00	overcast	5	1	1	0	0	0	0	0	0	0	0	0	0	2	2	0	0	0	0.4	0.4	0	0	0
1976_8	A	0.147711	Small	LUVp_0_15	07_08_2019	3	13:45:00	sun	5	1	1	0	1	0	0	0	0	0	0	0	0	3	2	1	0	0	0.6	0.4	0.2	0	0
1881_11	E	0.146725	Small	LUVp_0_15	31_07_2019	5	14:10:00	overcast	5	3	1	0	0	0	0	0	0	0	0	0	0	4	4	0	0	0	0.8	0.8	0	0	0
1976_8	M	0.147711	Small	LUVp_0_15	29_07_2019	2	15:14:00	sun	5	0	0	0	1	0	0	0	0	0	0	0	0	1	0	1	0	0	0.2	0	0.2	0	0
1880_9	J	0.199986	Small	LUVp_15_30	09_07_2019	2	13:40:00	sun	5	2	2	0	0	0	0	0	0	0	0	0	0	4	4	0	0	0	0.8	0.8	0	0	0
1990_26	Q	0.192725	Small	LUVp_15_30	06_08_2019	5	13:56:00	sun	5	5	0	0	0	0	0	0	0	0	0	1	0	6	5	0	0	1	1.2	1	0	0	0.2
1968_17	J	0.241979	Small	LUVp_15_30	09_07_2019	2	15:05:00	sun		3	6	0	0	0	0	0	0	0	0	0	0	9	9	0	0	0	1.8	1.8	0	0	0
PI_25_30	E	0.159065	Small	LUVp_15_30	29_07_2019	8	09:06:00	sun	5	1	0	0	0	0	0	0	0	0	0	0	0	1	1	0	0	0	0.2	0.2	0	0	0
1880_2	E	0.203348	Small	LUVp_15_30	29_07_2019	4	09:18:00	sun	5	3	2	0	0	0	0	0	1	0	0	0	0	6	5	0	1	0	1.2	1	0	0.2	0
1990_5	O	0.264856	Small	LUVp_15_30	29_07_2019	5	09:18:00	sun	5	3	0	0	1	0	0	0	0	0	0	0	0	4	3	1	0	0	0.8	0.6	0.2	0	0
1990_24	A	0.162808	Small	LUVp_15_30	06_08_2019	9	09:19:00	sun	5	7	3	1	1	0	0	0	0	0	0	0	0	12	11	1	0	0	2.4	2.2	0.2	0	0
1920_25	A	0.260972	Small	LUVp_15_30	29_07_2019	8	09:23:00	sun	5	4	3	0	2	0	0	0	0	0	0	0	0	9	7	2	0	0	1.8	1.4	0.4	0	0
1893_6	O	0.164058	Small	LUVp_15_30	06_08_2019	5	09:24:00	sun	5	2	0	1	0	0	0	0	0	0	0	0	0	3	3	0	0	0	0.6	0.6	0	0	0
1880_13	O	0.177563	Small	LUVp_15_30	06_08_2019	6	09:30:00	sun	5	4	2	0	0	0	0	0	0	0	0	0	0	6	6	0	0	0	1.2	1.2	0	0	0
1990_26	E	0.192725	Small	LUVp_15_30	29_07_2019	2	09:36:00	sun	5	0	0	0	0	0	0	2	0	0	0	0	0	2	0	0	2	0	0.4	0	0	0.4	0
1876_20	A	0.162262	Small	LUVp_15_30	29_07_2019	4	09:40:00	sun	5	1	1	0	0	0	0	0	0	0	0	0	0	2	2	0	0	0	0.4	0.4	0	0	0
1954_31	O	0.210545	Small	LUVp_15_30	07_08_2019	4	09:40:00	sun	5	3	2	1	1	0	0	0	0	0	0	0	0	7	6	1	0	0	1.4	1.2	0.2	0	0
1976_11	M	0.188639	Small	LUVp_15_30	06_08_2019	6	09:41:00	sun	5	4	1	0	1	0	0	0	0	0	0	0	0	6	5	1	0	0	1.2	1	0.2	0	0
1880_14	A	0.207494	Small	LUVp_15_30	07_08_2019	4	09:42:00	sun	5	1	0	1	0	0	0	0	0	0	0	0	0	2	2	0	0	0	0.4	0.4	0	0	0
1954_1	M	0.195219	Small	LUVp_15_30	29_07_2019	2	09:45:00	sun	5	4	0	0	0	0	0	0	0	0	0	0	0	4	4	0	0	0	0.8	0.8	0	0	0
1893_6	A	0.164058	Small	LUVp_15_30	29_07_2019	3	09:46:00	sun	5	0	3	0	0	0	0	0	0	0	0	0	0	3	3	0	0	0	0.6	0.6	0	0	0
1893_2	O	0.229668	Small	LUVp_15_30	29_07_2019	4	09:48:00	sun	5	0	0	0	0	0	0	0	0	0	0	0	0	0	0	0	0	0	0	0	0	0	0
1976_17	O	0.186182	Small	LUVp_15_30	06_08_2019	8	09:48:00	sun	5	6	3	1	0	0	0	0	0	0	0	0	0	10	10	0	0	0	2	2	0	0	0
1968_17	M	0.241979	Small	LUVp_15_30	07_08_2019	2	09:52:00	sun	5	1	1	0	0	0	0	0	0	0	0	0	0	2	2	0	0	0	0.4	0.4	0	0	0
1976_11	O	0.188639	Small	LUVp_15_30	07_08_2019	6	09:52:00	sun	5	2	1	0	1	0	0	0	0	0	0	0	0	4	3	1	0	0	0.8	0.6	0.2	0	0
1880_9	O	0.199986	Small	LUVp_15_30	06_08_2019	9	09:54:00	sun	5	5	3	0	0	0	0	0	0	0	0	0	0	8	8	0	0	0	1.6	1.6	0	0	0
1881_8	A	0.281417	Small	LUVp_15_30	06_08_2019	4	09:56:00	sun	5	1	2	0	1	0	0	0	0	0	0	0	0	4	3	1	0	0	0.8	0.6	0.2	0	0
1881_13	E	0.236518	Small	LUVp_15_30	29_07_2019	3	10:00:00	sun	5	2	0	0	0	0	0	1	0	0	0	0	0	3	2	0	1	0	0.6	0.4	0	0.2	0
1990_4	A	0.256606	Small	LUVp_15_30	06_08_2019	2	10:02:00	sun	5	1	0	0	0	0	0	0	0	0	0	0	0	1	1	0	0	0	0.2	0.2	0	0	0
1990_26	M	0.192725	Small	LUVp_15_30	06_08_2019	4	10:03:00	sun	5	1	1	0	0	0	0	0	0	0	0	0	0	2	2	0	0	0	0.4	0.4	0	0	0
1881_15	A	0.218319	Small	LUVp_15_30	07_08_2019	3	10:12:00	sun	5	2	2	0	1	0	0	0	0	0	0	0	0	5	4	1	0	0	1	0.8	0.2	0	0
1883_4	O	0.193693	Small	LUVp_15_30	06_08_2019	5	10:12:00	sun	5	1	2	0	1	0	0	0	0	0	0	0	0	4	3	1	0	0	0.8	0.6	0.2	0	0
1968_2	M	0.273513	Small	LUVp_15_30	06_08_2019	3	10:21:00	sun	5	3	0	0	0	0	0	0	0	0	0	0	0	3	3	0	0	0	0.6	0.6	0	0	0
1968_2	O	0.273513	Small	LUVp_15_30	07_08_2019	4	10:21:00	sun	5	2	0	0	0	0	0	0	0	0	0	0	0	2	2	0	0	0	0.4	0.4	0	0	0
1880_10	M	0.227338	Small	LUVp_15_30	07_08_2019	6	10:22:00	sun	5	10	2	0	1	0	0	0	0	0	0	0	0	13	12	1	0	0	2.6	2.4	0.2	0	0
1954_1	A	0.195219	Small	LUVp_15_30	07_08_2019	5	10:31:00	sun	5	1	1	0	2	0	0	0	0	0	0	0	0	4	2	2	0	0	0.8	0.4	0.4	0	0
1990_4	M	0.256606	Small	LUVp_15_30	07_08_2019	2	10:34:00	sun	5	0	0	0	0	0	0	0	0	0	0	0	0	0	0	0	0	0	0	0	0	0	0
1880_13	A	0.177563	Small	LUVp_15_30	07_08_2019	4	10:37:00	sun	5	5	2	0	0	0	0	0	0	0	0	0	0	7	7	0	0	0	1.4	1.4	0	0	0
1990_26	O	0.192725	Small	LUVp_15_30	07_08_2019	5	10:39:00	sun	5	0	2	1	0	0	0	0	0	0	0	0	0	3	3	0	0	0	0.6	0.6	0	0	0
1954_31	A	0.210545	Small	LUVp_15_30	06_08_2019	3	10:40:00	sun	5	1	1	0	0	1	0	0	0	0	0	0	0	3	2	1	0	0	0.6	0.4	0.2	0	0
1876_20	M	0.162262	Small	LUVp_15_30	06_08_2019	5	10:47:00	sun	5	7	0	0	2	0	0	0	0	0	0	0	0	9	7	2	0	0	1.8	1.4	0.4	0	0
1976_17	A	0.186182	Small	LUVp_15_30	07_08_2019	8	10:50:00	sun	5	5	2	1	1	0	0	0	0	0	0	0	0	9	8	1	0	0	1.8	1.6	0.2	0	0
1954_17	O	0.245506	Small	LUVp_15_30	07_08_2019	9	10:51:00	sun	5	4	1	0	2	0	0	0	0	0	0	0	0	7	5	2	0	0	1.4	1	0.4	0	0
1954_17	M	0.245506	Small	LUVp_15_30	06_08_2019	5	10:52:00	sun	5	4	0	0	2	0	0	0	0	0	0	0	0	6	4	2	0	0	1.2	0.8	0.4	0	0
PI_25_30	E	0.159065	Small	LUVp_15_30	29_07_2019	8	11:06:00	sun	5	1	4	0	0	0	0	1	0	0	0	1	0	7	5	0	1	1	1.4	1	0	0.2	0.2
1880_2	E	0.203348	Small	LUVp_15_30	29_07_2019	4	11:17:00	sun	5	4	0	0	0	0	0	0	0	0	0	0	0	4	4	0	0	0	0.8	0.8	0	0	0
1990_5	O	0.264856	Small	LUVp_15_30	29_07_2019	5	11:18:00	sun	5	6	0	0	1	0	0	0	0	0	0	0	0	7	6	1	0	0	1.4	1.2	0.2	0	0
1920_25	A	0.260972	Small	LUVp_15_30	29_07_2019	8	11:22:00	sun	5	6	1	0	0	0	0	0	0	0	0	0	0	7	7	0	0	0	1.4	1.4	0	0	0
1990_26	E	0.192725	Small	LUVp_15_30	29_07_2019	2	11:36:00	sun	5	4	0	0	0	0	0	0	0	0	0	0	0	4	4	0	0	0	0.8	0.8	0	0	0
1876_20	A	0.162262	Small	LUVp_15_30	29_07_2019	4	11:39:00	sun	5	0	0	0	2	0	0	0	0	0	0	0	0	2	0	2	0	0	0.4	0	0.4	0	0
1881_13	E	0.236518	Small	LUVp_15_30	29_07_2019	3	11:42:00	sun	5	2	2	0	0	0	0	0	0	0	0	0	0	4	4	0	0	0	0.8	0.8	0	0	0
1893_6	A	0.164058	Small	LUVp_15_30	29_07_2019	3	11:45:00	sun	5	0	0	0	0	0	0	0	0	0	0	0	0	0	0	0	0	0	0	0	0	0	0
1893_2	O	0.229668	Small	LUVp_15_30	29_07_2019	4	11:48:00	sun	5	0	0	0	0	0	0	1	0	0	0	0	0	1	0	0	1	0	0.2	0	0	0.2	0
1954_1	M	0.195219	Small	LUVp_15_30	29_07_2019	2	11:55:00	sun	5	3	1	0	0	0	0	0	0	0	0	0	0	4	4	0	0	0	0.8	0.8	0	0	0
PI_25_30	E	0.159065	Small	LUVp_15_30	29_07_2019	8	13:05:00	sun	5	2	0	0	0	0	0	3	0	0	0	0	0	5	2	0	3	0	1	0.4	0	0.6	0
1990_24	A	0.162808	Small	LUVp_15_30	06_08_2019	9	13:11:00	sun	5	2	1	1	2	1	0	0	0	0	0	0	0	7	4	3	0	0	1.4	0.8	0.6	0	0
1893_6	O	0.164058	Small	LUVp_15_30	06_08_2019	5	13:12:00	sun	5	1	0	1	0	0	0	0	0	0	0	0	0	2	2	0	0	0	0.4	0.4	0	0	0
1990_24	E	0.162808	Small	LUVp_15_30	31_07_2019	3	13:16:00	overcast	5	4	0	0	1	0	0	1	0	0	0	0	0	6	4	1	1	0	1.2	0.8	0.2	0.2	0
1880_2	E	0.203348	Small	LUVp_15_30	29_07_2019	4	13:17:00	sun	5	4	1	0	0	0	0	0	0	0	0	0	0	5	5	0	0	0	1	1	0	0	0
1880_13	O	0.177563	Small	LUVp_15_30	06_08_2019	6	13:18:00	sun	5	4	1	0	0	0	0	0	0	0	0	0	0	5	5	0	0	0	1	1	0	0	0
1990_5	O	0.264856	Small	LUVp_15_30	29_07_2019	5	13:18:00	sun	5	4	0	0	0	0	0	1	0	0	0	0	0	5	4	0	1	0	1	0.8	0	0.2	0
1893_6	J	0.164058	Small	LUVp_15_30	09_07_2019	3	13:19:00	sun	5	1	3	1	0	1	1	0	0	0	0	0	0	7	5	2	0	0	1.4	1	0.4	0	0
1920_25	A	0.260972	Small	LUVp_15_30	29_07_2019	8	13:22:00	sun	5	6	1	0	0	0	0	0	0	0	0	0	0	7	7	0	0	0	1.4	1.4	0	0	0
1893_6	M	0.164058	Small	LUVp_15_30	30_07_2019	3	13:26:00	sun/overcast	5	0	1	0	0	0	0	0	0	0	0	0	0	1	1	0	0	0	0.2	0.2	0	0	0
1976_11	Q	0.188639	Small	LUVp_15_30	06_08_2019	5	13:30:00	sun	5	1	1	0	1	0	0	0	0	0	0	0	0	3	2	1	0	0	0.6	0.4	0.2	0	0
1880_13	M	0.177563	Small	LUVp_15_30	30_07_2019	2	13:34:00	sun/overcast	5	0	0	0	0	0	0	0	0	0	0	0	0	0	0	0	0	0	0	0	0	0	0
1990_26	E	0.192725	Small	LUVp_15_30	29_07_2019	2	13:34:00	sun	5	0	0	0	0	0	0	0	0	0	0	0	0	0	0	0	0	0	0	0	0	0	0
1880_14	A	0.207494	Small	LUVp_15_30	07_08_2019	4	13:35:00	sun	5	3	0	0	2	0	1	0	0	0	0	0	0	6	3	3	0	0	1.2	0.6	0.6	0	0
1954_31	O	0.210545	Small	LUVp_15_30	07_08_2019	4	13:36:00	sun	5	2	1	0	0	0	0	0	0	0	0	0	0	3	3	0	0	0	0.6	0.6	0	0	0
1976_17	O	0.186182	Small	LUVp_15_30	06_08_2019	8	13:36:00	sun	5	8	2	0	0	0	0	0	0	0	0	0	0	10	10	0	0	0	2	2	0	0	0
1976_11	A	0.188639	Small	LUVp_15_30	31_07_2019	2	13:37:00	sun/overcast	5	0	2	0	0	0	0	0	0	0	0	0	0	2	2	0	0	0	0.4	0.4	0	0	0
1876_20	A	0.162262	Small	LUVp_15_30	29_07_2019	4	13:38:00	sun	5	1	2	0	0	0	0	0	0	0	0	0	0	3	3	0	0	0	0.6	0.6	0	0	0
1880_14	O	0.207494	Small	LUVp_15_30	31_07_2019	2	13:38:00	sun/overcast	5	1	3	0	1	0	0	0	0	0	0	0	0	5	4	1	0	0	1	0.8	0.2	0	0
1881_13	E	0.236518	Small	LUVp_15_30	29_07_2019	3	13:40:00	sun	5	2	2	0	0	0	0	0	0	0	0	0	0	4	4	0	0	0	0.8	0.8	0	0	0
1954_1	M	0.195219	Small	LUVp_15_30	29_07_2019	2	13:40:00	sun	5	1	2	0	0	0	0	0	0	0	0	0	0	3	3	0	0	0	0.6	0.6	0	0	0
1880_9	O	0.199986	Small	LUVp_15_30	06_08_2019	9	13:42:00	sun	5	6	1	0	0	1	0	0	0	0	0	0	0	8	7	1	0	0	1.6	1.4	0.2	0	0
1893_6	A	0.164058	Small	LUVp_15_30	29_07_2019	3	13:45:00	sun	5	1	1	0	0	0	0	0	0	0	0	0	0	2	2	0	0	0	0.4	0.4	0	0	0
1893_2	O	0.229668	Small	LUVp_15_30	29_07_2019	4	13:48:00	sun	5	1	0	0	1	0	0	0	0	0	0	0	0	2	1	1	0	0	0.4	0.2	0.2	0	0
1976_11	O	0.188639	Small	LUVp_15_30	07_08_2019	6	13:48:00	sun	5	1	0	0	1	0	0	0	0	0	0	0	0	2	1	1	0	0	0.4	0.2	0.2	0	0
1881_8	A	0.281417	Small	LUVp_15_30	06_08_2019	4	13:49:00	sun	5	3	1	0	0	0	0	0	0	0	0	0	0	4	4	0	0	0	0.8	0.8	0	0	0
1976_17	M	0.186182	Small	LUVp_15_30	30_07_2019	3	13:49:00	sun/overcast	5	1	0	0	1	1	0	0	0	0	0	0	0	3	1	2	0	0	0.6	0.2	0.4	0	0
1881_15	O	0.218319	Small	LUVp_15_30	31_07_2019	2	13:50:00	sun/overcast	5	1	1	0	1	0	0	0	0	0	0	0	0	3	2	1	0	0	0.6	0.4	0.2	0	0
1990_4	A	0.256606	Small	LUVp_15_30	06_08_2019	2	13:50:00	sun	5	3	2	0	0	0	0	0	0	0	0	0	0	5	5	0	0	0	1	1	0	0	0
1881_8	E	0.281417	Small	LUVp_15_30	31_07_2019	2	13:51:00	overcast	5	0	0	0	0	1	0	0	0	0	0	0	0	1	0	1	0	0	0.2	0	0.2	0	0
1883_4	O	0.193693	Small	LUVp_15_30	06_08_2019	5	14:00:00	sun	5	4	0	0	1	0	0	0	0	0	0	0	0	5	4	1	0	0	1	0.8	0.2	0	0
1881_15	A	0.218319	Small	LUVp_15_30	07_08_2019	3	14:02:00	sun	5	5	3	0	1	0	0	0	0	0	0	0	0	9	8	1	0	0	1.8	1.6	0.2	0	0
1920_25	A	0.260972	Small	LUVp_15_30	31_07_2019	7	14:15:00	sun/overcast	5	9	3	0	1	0	0	0	0	0	0	0	0	13	12	1	0	0	2.6	2.4	0.2	0	0
1968_2	Q	0.273513	Small	LUVp_15_30	06_08_2019	3	14:15:00	sun	5	3	0	0	0	0	0	0	0	0	0	0	0	3	3	0	0	0	0.6	0.6	0	0	0
1883_4	M	0.193693	Small	LUVp_15_30	30_07_2019	2	14:17:00	sun/overcast	5	5	1	0	0	0	0	0	0	0	0	0	0	6	6	0	0	0	1.2	1.2	0	0	0
1954_1	O	0.195219	Small	LUVp_15_30	31_07_2019	3	14:18:00	sun/overcast	5	2	0	0	0	0	0	0	0	0	0	0	0	2	2	0	0	0	0.4	0.4	0	0	0
1968_2	O	0.273513	Small	LUVp_15_30	07_08_2019	4	14:18:00	sun	5	3	1	0	0	0	0	0	0	0	0	0	0	4	4	0	0	0	0.8	0.8	0	0	0
1954_1	A	0.195219	Small	LUVp_15_30	07_08_2019	5	14:19:00	sun	5	5	0	2	1	0	0	0	0	0	0	0	0	8	7	1	0	0	1.6	1.4	0.2	0	0
1954_31	A	0.210545	Small	LUVp_15_30	06_08_2019	3	14:24:00	sun	5	0	0	0	0	2	0	0	0	0	0	1	0	3	0	2	0	1	0.6	0	0.4	0	0.2
1876_20	A	0.162262	Small	LUVp_15_30	31_07_2019	2	14:27:00	sun/overcast	5	0	0	0	2	2	0	0	0	0	0	0	0	4	0	4	0	0	0.8	0	0.8	0	0
1880_13	A	0.177563	Small	LUVp_15_30	07_08_2019	4	14:32:00	sun	5	8	4	0	0	0	0	0	0	0	0	0	0	12	12	0	0	0	2.4	2.4	0	0	0
1954_17	A	0.245506	Small	LUVp_15_30	31_07_2019	3	14:32:00	sun/overcast	5	1	0	0	3	0	0	0	0	0	0	0	0	4	1	3	0	0	0.8	0.2	0.6	0	0
1893_2	M	0.229668	Small	LUVp_15_30	30_07_2019	5	14:33:00	sun/overcast	5	2	0	0	0	0	0	0	0	0	0	0	0	2	2	0	0	0	0.4	0.4	0	0	0
1954_31	E	0.210545	Small	LUVp_15_30	31_07_2019	3	14:33:00	overcast	5	0	2	0	1	0	0	1	0	0	0	0	0	4	2	1	1	0	0.8	0.4	0.2	0.2	0
1990_26	O	0.192725	Small	LUVp_15_30	07_08_2019	5	14:36:00	sun	5	6	1	1	0	0	0	0	0	0	0	0	0	8	8	0	0	0	1.6	1.6	0	0	0
1883_4	J	0.193693	Small	LUVp_15_30	09_07_2019	5	14:39:00	sun	5	5	3	0	0	0	0	0	0	0	0	0	0	8	8	0	0	0	1.6	1.6	0	0	0
1976_17	A	0.186182	Small	LUVp_15_30	07_08_2019	8	14:39:00	sun	5	6	4	0	0	0	0	0	0	0	0	0	0	10	10	0	0	0	2	2	0	0	0
1876_20	Q	0.162262	Small	LUVp_15_30	06_08_2019	6	14:40:00	sun	5	3	0	0	2	0	0	1	0	0	0	0	0	6	3	2	1	0	1.2	0.6	0.4	0.2	0
1954_17	O	0.245506	Small	LUVp_15_30	07_08_2019	9	14:48:00	sun	5	4	3	0	2	0	0	0	0	0	0	0	0	9	7	2	0	0	1.8	1.4	0.4	0	0
1990_26	A	0.192725	Small	LUVp_15_30	31_07_2019	3	14:50:00	sun/overcast	5	0	1	0	1	0	0	0	0	0	0	0	0	2	1	1	0	0	0.4	0.2	0.2	0	0
1880_10	J	0.227338	Small	LUVp_15_30	09_07_2019	5	14:53:00	sun	5	3	6	2	0	0	0	0	0	0	0	0	0	11	11	0	0	0	2.2	2.2	0	0	0
PI_25_30	E	0.159065	Small	LUVp_15_30	29_07_2019	8	15:05:00	sun	5	0	2	0	0	0	0	2	0	0	0	0	0	4	2	0	2	0	0.8	0.4	0	0.4	0
1880_2	E	0.203348	Small	LUVp_15_30	29_07_2019	4	15:16:00	sun	5	5	1	0	0	0	0	0	0	0	0	0	0	6	6	0	0	0	1.2	1.2	0	0	0
1990_5	O	0.264856	Small	LUVp_15_30	29_07_2019	5	15:18:00	sun	5	2	1	0	0	0	0	0	0	0	0	1	0	4	3	0	0	1	0.8	0.6	0	0	0.2
1920_25	A	0.260972	Small	LUVp_15_30	29_07_2019	8	15:22:00	sun	5	7	0	0	2	1	0	0	0	0	0	0	0	10	7	3	0	0	2	1.4	0.6	0	0
1990_26	E	0.192725	Small	LUVp_15_30	29_07_2019	2	15:28:00	sun	5	1	0	0	0	0	0	0	0	0	0	0	0	1	1	0	0	0	0.2	0.2	0	0	0
1876_20	A	0.162262	Small	LUVp_15_30	29_07_2019	4	15:38:00	sun	5	0	0	0	4	0	0	0	0	0	0	0	0	4	0	4	0	0	0.8	0	0.8	0	0
1881_13	E	0.236518	Small	LUVp_15_30	29_07_2019	3	15:39:00	sun	5	3	0	0	0	0	0	0	0	0	0	0	0	3	3	0	0	0	0.6	0.6	0	0	0
1954_1	M	0.195219	Small	LUVp_15_30	29_07_2019	2	15:42:00	sun	5	5	0	0	0	0	0	0	0	0	0	0	0	5	5	0	0	0	1	1	0	0	0
1893_6	A	0.164058	Small	LUVp_15_30	29_07_2019	3	15:45:00	sun	5	0	0	0	0	1	0	0	0	0	0	0	0	1	0	1	0	0	0.2	0	0.2	0	0
1893_2	O	0.229668	Small	LUVp_15_30	29_07_2019	4	15:48:00	sun	5	2	0	0	0	0	0	2	0	0	0	0	0	4	2	0	2	0	0.8	0.4	0	0.4	0
AMES_3_10	A	0.616744	Intermediate	LUVp_50_80	06_08_2019	2	09:12:00	sun	5	1	0	1	0	0	0	0	0	0	0	0	0	2	2	0	0	0	0.4	0.4	0	0	0
PI_35_9	A	0.603263	Intermediate	LUVp_50_80	07_08_2019	3	09:18:00	sun	5	2	0	0	0	0	1	0	0	0	0	0	0	3	2	1	0	0	0.6	0.4	0.2	0	0
PI_35_2	A	0.595233	Intermediate	LUVp_50_80	06_08_2019	5	09:25:00	sun	5	7	3	0	0	0	1	0	0	0	0	0	0	11	10	1	0	0	2.2	2	0.2	0	0
1830_2	A	0.587804	Intermediate	LUVp_50_80	06_08_2019	8	09:31:00	sun	5	4	1	0	4	0	0	0	0	0	0	0	0	9	5	4	0	0	1.8	1	0.8	0	0
1830_10	A	0.555956	Intermediate	LUVp_50_80	07_08_2019	3	09:36:00	sun	5	2	1	0	2	0	0	0	0	0	0	0	0	5	3	2	0	0	1	0.6	0.4	0	0
2144_6	A	0.566738	Intermediate	LUVp_50_80	06_08_2019	2	09:37:00	sun	5	1	0	0	0	0	0	0	0	0	0	0	0	1	1	0	0	0	0.2	0.2	0	0	0
PI_35_3	A	0.575139	Intermediate	LUVp_50_80	07_08_2019	3	09:48:00	sun	5	4	0	0	2	1	0	0	0	0	0	0	0	7	4	3	0	0	1.4	0.8	0.6	0	0
1849_2	A	0.54053	Intermediate	LUVp_50_80	07_08_2019	3	10:00:00	sun	5	1	0	0	2	0	0	0	0	0	0	0	0	3	1	2	0	0	0.6	0.2	0.4	0	0
1799_7	O	0.646944	Intermediate	LUVp_50_80	07_08_2019	10	10:03:00	sun	5	3	1	0	1	0	0	0	0	0	0	0	0	5	4	1	0	0	1	0.8	0.2	0	0
2144_6	M	0.566738	Intermediate	LUVp_50_80	07_08_2019	4	10:04:00	sun	5	3	0	0	0	0	0	0	0	0	0	0	0	3	3	0	0	0	0.6	0.6	0	0	0
2139_15	M	0.60111	Intermediate	LUVp_50_80	07_08_2019	6	10:29:00	sun	5	4	3	0	1	0	0	0	0	0	0	0	0	8	7	1	0	0	1.6	1.4	0.2	0	0
2144_13	O	0.600662	Intermediate	LUVp_50_80	06_08_2019	9	10:42:00	sun	5	4	2	0	2	0	0	0	0	0	0	0	0	8	6	2	0	0	1.6	1.2	0.4	0	0
AMES_3_10	E	0.616744	Intermediate	LUVp_50_80	31_07_2019	2	1210	overcast	5	1	0	0	0	0	0	0	0	0	0	0	0	1	1	0	0	0	0.2	0.2	0	0	0
AMES_3_10	A	0.616744	Intermediate	LUVp_50_80	06_08_2019	2	13:05:00	sun	5	1		1	0	0	0	0	0	0	0	0	0	2	2	0	0	0	0.4	0.4	0	0	0
PI_35_9	A	0.603263	Intermediate	LUVp_50_80	07_08_2019	3	13:12:00	sun	5	0	0	0	1	0	0	0	0	0	0	0	0	1	0	1	0	0	0.2	0	0.2	0	0
PI_35_2	A	0.595233	Intermediate	LUVp_50_80	06_08_2019	5	13:16:00	sun	5	5	0	0	1	0	0	0	0	0	0	0	0	6	5	1	0	0	1.2	1	0.2	0	0
1830_2	A	0.587804	Intermediate	LUVp_50_80	06_08_2019	8	13:22:00	sun	5	4	2	0	4	0	0	0	0	0	0	0	0	10	6	4	0	0	2	1.2	0.8	0	0
PI_35_2	E	0.595233	Intermediate	LUVp_50_80	31_07_2019	2	13:22:00	overcast	5	0	1	0	1	0	0	0	0	0	0	0	0	2	1	1	0	0	0.4	0.2	0.2	0	0
2144_6	A	0.566738	Intermediate	LUVp_50_80	06_08_2019	2	13:27:00	sun	5	4	0	0	0	0	0	0	0	0	0	0	0	4	4	0	0	0	0.8	0.8	0	0	0
1830_2	E	0.587804	Intermediate	LUVp_50_80	31_07_2019	3	13:28:00	overcast	5	0	1	0	1	0	0	0	0	0	0	0	0	2	1	1	0	0	0.4	0.2	0.2	0	0
1830_10	A	0.555956	Intermediate	LUVp_50_80	07_08_2019	3	13:29:00	sun	5	0	0	0	2	3	1	0	0	0	0	0	0	6	0	6	0	0	1.2	0	1.2	0	0
2144_6	E	0.566738	Intermediate	LUVp_50_80	31_07_2019	2	13:34:00	overcast	5	0	0	0	0	0	0	0	0	0	0	0	0	0	0	0	0	0	0	0	0	0	0
PI_20_11	E	0.585657	Intermediate	LUVp_50_80	31_07_2019	6	13:40:00	overcast	5	5	1	0	0	0	0	0	0	0	0	0	0	6	6	0	0	0	1.2	1.2	0	0	0
PI_35_3	A	0.575139	Intermediate	LUVp_50_80	07_08_2019	3	13:40:00	sun	5	3	2	0	1	0	0	0	0	0	0	0	0	6	5	1	0	0	1.2	1	0.2	0	0
1849_2	A	0.54053	Intermediate	LUVp_50_80	07_08_2019	3	13:51:00	sun	5	1	1	0	5	1	0	0	0	0	0	0	0	8	2	6	0	0	1.6	0.4	1.2	0	0
PI_17_13	O	0.506638	Intermediate	LUVp_50_80	31_07_2019	7	13:56:00	sun/overcast	5	4	6	0	0	0	0	0	0	0	0	0	0	10	10	0	0	0	2	2	0	0	0
1799_7	O	0.646944	Intermediate	LUVp_50_80	07_08_2019	10	14:00:00	sun	5	3	3	2	0	0	0	0	0	0	0	0	0	8	8	0	0	0	1.6	1.6	0	0	0
2144_13	O	0.600662	Intermediate	LUVp_50_80	06_08_2019	9	14:30:00	sun	5	2	0	0	3	0	0	0	0	0	0	0	0	5	2	3	0	0	1	0.4	0.6	0	0
2144_6	O	0.566738	Intermediate	LUVp_50_80	31_07_2019	3	14:38:00	sun/overcast	5	2	0	0	0	0	0	0	0	0	0	0	0	2	2	0	0	0	0.4	0.4	0	0	0
2144_13	M	0.600662	Intermediate	LUVp_50_80	30_07_2019	8	14:47:00	sun/overcast	5	0	1	1	0	2	0	0	0	0	0	0	0	4	2	2	0	0	0.8	0.4	0.4	0	0
1854_14	O	0.789249	Intermediate	LUVp_50_80	29_07_2019	3	09:00:00	sun	5	1	0	0	0	0	0	0	0	0	0	0	0	1	1	0	0	0	0.2	0.2	0	0	0
PI_26_12	A	0.699571	Intermediate	LUVp_50_80	06_08_2019	6	09:05:00	sun	5	0	1	0	2	0	0	0	0	0	0	0	0	3	1	2	0	0	0.6	0.2	0.4	0	0
PI_39_2	M	0.702321	Intermediate	LUVp_50_80	07_08_2019	6	09:09:00	sun	5	2	1	0	2	0	0	0	0	0	0	0	0	5	3	2	0	0	1	0.6	0.4	0	0
PI_17_3	M	0.786252	Intermediate	LUVp_50_80	06_08_2019	4	09:10:00	sun	5	4	0	1	0	0	0	0	0	0	0	0	0	5	5	0	0	0	1	1	0	0	0
PI_26_12	M	0.699571	Intermediate	LUVp_50_80	07_08_2019	7	09:15:00	sun	5	6	0	0	2	0	0	0	0	0	0	0	0	8	6	2	0	0	1.6	1.2	0.4	0	0
2149_1	O	0.78849	Intermediate	LUVp_50_80	07_08_2019	2	09:16:00	sun	5	1	0	1	0	0	0	0	0	0	0	0	0	2	2	0	0	0	0.4	0.4	0	0	0
1854_14	O	0.789249	Intermediate	LUVp_50_80	06_08_2019	8	09:18:00	sun	5	1	1	0	0	1	0	0	0	0	0	0	0	3	2	1	0	0	0.6	0.4	0.2	0	0
MB1W_31	M	0.689507	Intermediate	LUVp_50_80	07_08_2019	8	09:21:00	sun	5	6	2	0	1	0	0	1	0	0	0	0	0	10	8	1	1	0	2	1.6	0.2	0.2	0
1854_10	O	0.780167	Intermediate	LUVp_50_80	07_08_2019	10	09:28:00	sun	5	4	2	0	0	0	0	0	0	0	0	0	0	6	6	0	0	0	1.2	1.2	0	0	0
1854_10	M	0.780167	Intermediate	LUVp_50_80	06_08_2019	7	09:29:00	sun	5	7	0	0	1	0	0	1	0	0	0	0	0	9	7	1	1	0	1.8	1.4	0.2	0.2	0
1828_26	O	0.698416	Intermediate	LUVp_50_80	07_08_2019	3	09:34:00	sun	5	2	0	0	1	0	0	0	0	0	0	0	0	3	2	1	0	0	0.6	0.4	0.2	0	0
1800_11	M	0.65562	Intermediate	LUVp_50_80	06_08_2019	4	09:35:00	sun	5	14	0	0	1	0	0	0	0	0	0	0	0	15	14	1	0	0	3	2.8	0.2	0	0
PI_18_51	O	0.702658	Intermediate	LUVp_50_80	06_08_2019	2	10:00:00	sun	5	3	2	0	0	0	0	0	0	0	0	0	0	5	5	0	0	0	1	1	0	0	0
PI_20_30	E	0.742743	Intermediate	LUVp_50_80	29_07_2019	10	10:06:00	sun	5	4	0	0	1	0	0	3	0	0	0	0	0	8	4	1	3	0	1.6	0.8	0.2	0.6	0
PI_17_3	M	0.786252	Intermediate	LUVp_50_80	07_08_2019	5	10:16:00	sun	5	7	0	0	0	0	0	0	0	0	0	0	0	7	7	0	0	0	1.4	1.4	0	0	0
1854_14	O	0.789249	Intermediate	LUVp_50_80	29_07_2019	3	11:00:00	sun	5	0	0	0	0	1	0	0	0	0	0	0	0	1	0	1	0	0	0.2	0	0.2	0	0
PI_20_30	E	0.742743	Intermediate	LUVp_50_80	29_07_2019	10	11:54:00	sun	5	6	1	0	0	0	0	0	0	0	0	0	0	7	7	0	0	0	1.4	1.4	0	0	0
PI_26_12	A	0.699571	Intermediate	LUVp_50_80	06_08_2019	6	1259	sun	5	6	0	0	4	2	0	0	0	0	0	0	0	12	6	6	0	0	2.4	1.2	1.2	0	0
1854_14	O	0.789249	Intermediate	LUVp_50_80	29_07_2019	3	13:00:00	sun	5	0	0	0	2	0	0	0	0	0	0	0	0	2	0	2	0	0	0.4	0	0.4	0	0
PI_17_3	Q	0.786252	Intermediate	LUVp_50_80	06_08_2019	4	13:00:00	sun	5	6	0	0	1	0	0	0	0	0	0	0	0	7	6	1	0	0	1.4	1.2	0.2	0	0
1800_23	J	0.761619	Intermediate	LUVp_50_80	09_07_2019	5	13:04:00	sun	5	1	0	1	1	0	0	0	0	0	0	0	0	3	2	1	0	0	0.6	0.4	0.2	0	0
PI_26_12	E	0.699571	Intermediate	LUVp_50_80	31_07_2019	2	13:05:00	overcast	5	0	0	0	1	0	0	0	0	0	0	0	0	1	0	1	0	0	0.2	0	0.2	0	0
1854_14	O	0.789249	Intermediate	LUVp_50_80	06_08_2019	8	13:06:00	sun	5	0	2	0	2	0	0	0	0	0	0	0	0	4	2	2	0	0	0.8	0.4	0.4	0	0
PI_17_3	A	0.786252	Intermediate	LUVp_50_80	31_07_2019	2	13:06:00	sun/overcast	5	0	1	0	0	0	0	0	0	0	0	0	0	1	1	0	0	0	0.2	0.2	0	0	0
SK1W_17	M	0.673965	Intermediate	LUVp_50_80	30_07_2019	8	13:08:00	sun/overcast	5	5	0	1	0	0	0	0	0	0	0	0	0	6	6	0	0	0	1.2	1.2	0	0	0
2149_1	O	0.78849	Intermediate	LUVp_50_80	07_08_2019	2	13:12:00	sun	5	1	0	0	1	0	0	0	0	0	0	0	0	2	1	1	0	0	0.4	0.2	0.2	0	0
1854_14	M	0.789249	Intermediate	LUVp_50_80	30_07_2019	5	13:14:00	sun/overcast	5	3	0	0	3	0	0	0	0	0	0	0	0	6	3	3	0	0	1.2	0.6	0.6	0	0
1854_10	Q	0.780167	Intermediate	LUVp_50_80	06_08_2019	8	13:16:00	sun	5	8	0	0	0	0	0	0	0	0	0	0	0	8	8	0	0	0	1.6	1.6	0	0	0
PI_21_11	A	0.698128	Intermediate	LUVp_50_80	31_07_2019	10	13:18:00	sun/overcast	5	9	3	0	2	0	0	0	0	0	0	2	0	16	12	2	0	2	3.2	2.4	0.4	0	0.4
PI_20_30	M	0.742743	Intermediate	LUVp_50_80	30_07_2019	9	13:20:00	sun/overcast	5	5	0	1	1	0	0	0	0	0	0	0	0	7	6	1	0	0	1.4	1.2	0.2	0	0
1800_11	Q	0.65562	Intermediate	LUVp_50_80	06_08_2019	7	13:24:00	sun	5	0	0	0	2	0	0	0	0	0	0	0	0	2	0	2	0	0	0.4	0	0.4	0	0
1854_10	O	0.780167	Intermediate	LUVp_50_80	07_08_2019	10	13:24:00	sun	5	7	3	0	0	0	0	0	0	0	0	0	0	10	10	0	0	0	2	2	0	0	0
1854_10	A	0.780167	Intermediate	LUVp_50_80	31_07_2019	2	13:25:00	sun/overcast	5	2	0	0	0	0	0	0	0	0	0	0	0	2	2	0	0	0	0.4	0.4	0	0	0
1828_26	O	0.698416	Intermediate	LUVp_50_80	07_08_2019	3	13:30:00	sun	5	3	1	0	0	0	0	0	0	0	0	0	0	4	4	0	0	0	0.8	0.8	0	0	0
1800_11	A	0.65562	Intermediate	LUVp_50_80	31_07_2019	2	13:31:00	sun/overcast	5	1	3	0	1	0	0	0	0	0	0	0	0	5	4	1	0	0	1	0.8	0.2	0	0
PI_26_21	J	0.699253	Intermediate	LUVp_50_80	09_07_2019	3	13:32:00	sun	5	4	0	0	2	1	0	0	0	0	0	0	0	7	4	3	0	0	1.4	0.8	0.6	0	0
AMES_2_17	A	0.672699	Intermediate	LUVp_50_80	31_07_2019	8	13:44:00	sun/overcast	5	4	0	0	2	0	0	0	0	0	0	0	0	6	4	2	0	0	1.2	0.8	0.4	0	0
2149_1	J	0.78849	Intermediate	LUVp_50_80	09_07_2019	4	13:48:00	sun	5	2	1	0	1	1	0	0	0	0	0	0	0	5	3	2	0	0	1	0.6	0.4	0	0
PI_18_51	O	0.702658	Intermediate	LUVp_50_80	06_08_2019	2	13:48:00	sun	5	0	1	0	0	0	0	0	0	0	0	0	0	1	1	0	0	0	0.2	0.2	0	0	0
PI_20_30	E	0.742743	Intermediate	LUVp_50_80	29_07_2019	10	13:51:00	sun	5	8	0	0	1	0	0	1	0	0	0	0	0	10	8	1	1	0	2	1.6	0.2	0.2	0
1800_6	J	0.67306	Intermediate	LUVp_50_80	09_07_2019	7	13:57:00	sun	5	11	3	0	1	0	0	0	0	0	0	0	0	15	14	1	0	0	3	2.8	0.2	0	0
1854_14	O	0.789249	Intermediate	LUVp_50_80	29_07_2019	3	15:00:00	sun	5	1	0	0	2	0	0	0	0	0	0	0	0	3	1	2	0	0	0.6	0.2	0.4	0	0
PI_20_30	E	0.742743	Intermediate	LUVp_50_80	29_07_2019	10	15:51:00	sun	5	7	0	0	0	0	0	0	0	0	0	0	0	7	7	0	0	0	1.4	1.4	0	0	0
1815_22	A	1	Large	LUVp_95_100	29_07_2019	2	09:00:00	sun	5	1	1	0	0	0	0	0	0	0	0	0	0	2	2	0	0	0	0.4	0.4	0	0	0
1831_11	E	1	Large	LUVp_95_100	29_07_2019	3	09:00:00	sun	5	0	2	0	0	0	0	0	0	0	0	0	0	2	2	0	0	0	0.4	0.4	0	0	0
1802_25	A	1	Large	LUVp_95_100	07_08_2019	3	09:05:00	sun	5	2	2	1	0	0	0	0	0	0	0	0	0	5	5	0	0	0	1	1	0	0	0
AMES_2_3	A	1	Large	LUVp_95_100	29_07_2019	5	09:05:00	sun	5	3	1	0	1	1	0	0	0	0	0	0	0	6	4	2	0	0	1.2	0.8	0.4	0	0
PI_34_5	M	1	Large	LUVp_95_100	29_07_2019	5	09:10:00	sun	5	1	0	0	0	0	0	0	0	0	0	0	0	1	1	0	0	0	0.2	0.2	0	0	0
1831_13	A	1	Large	LUVp_95_100	29_07_2019	3	09:11:00	sun	5	2	0	0	0	0	0	0	0	0	0	0	0	2	2	0	0	0	0.4	0.4	0	0	0
1854_18	E	0.985313	Large	LUVp_95_100	29_07_2019	2	09:12:00	sun	5	0	0	0	1	0	0	0	0	0	0	0	0	1	0	1	0	0	0.2	0	0.2	0	0
PI_39_4	E	1	Large	LUVp_95_100	29_07_2019	6	09:24:00	sun	5	0	0	0	0	0	0	0	0	0	0	0	0	0	0	0	0	0	0	0	0	0	0
1827_16	A	1	Large	LUVp_95_100	07_08_2019	3	09:30:00	sun	5	0	0	1	1	0	0	0	0	0	0	0	0	2	1	1	0	0	0.4	0.2	0.2	0	0
1818_27	M	1	Large	LUVp_95_100	07_08_2019	3	09:34:00	sun	5	3	2	0	0	0	0	0	0	0	0	0	0	5	5	0	0	0	1	1	0	0	0
PI_34_1	M	1	Large	LUVp_95_100	29_07_2019	9	09:34:00	sun	5	0	0	0	0	0	0	0	0	0	0	0	0	0	0	0	0	0	0	0	0	0	0
1797_3	O	1	Large	LUVp_95_100	29_07_2019	2	09:36:00	sun	5	2	0	0	1	0	0	0	0	0	0	0	0	3	2	1	0	0	0.6	0.4	0.2	0	0
1805_16	O	1	Large	LUVp_95_100	29_07_2019	2	09:42:00	sun	5	1	0	0	2	0	0	0	0	0	0	0	0	3	1	2	0	0	0.6	0.2	0.4	0	0
1817_7	O	1	Large	LUVp_95_100	07_08_2019	2	09:46:00	sun	5	2	1	0	4	0	0	0	0	0	0	0	0	7	3	4	0	0	1.4	0.6	0.8	0	0
1817_8	M	1	Large	LUVp_95_100	07_08_2019	3	09:46:00	sun	5	4	0	0	1	0	0	0	0	0	0	0	0	5	4	1	0	0	1	0.8	0.2	0	0
1805_12	O	1	Large	LUVp_95_100	07_08_2019	5	09:58:00	sun	5	2	1	0	0	0	0	0	0	0	0	0	0	3	3	0	0	0	0.6	0.6	0	0	0
1827_9	A	1	Large	LUVp_95_100	07_08_2019	2	10:06:00	sun	5	2	0	0	0	0	0	0	0	0	0	0	0	2	2	0	0	0	0.4	0.4	0	0	0
PI_34_55	O	1	Large	LUVp_95_100	06_08_2019	9	10:06:00	sun	5	3	1	0	0	0	0	0	0	0	0	0	0	4	4	0	0	0	0.8	0.8	0	0	0
1797_7	O	1	Large	LUVp_95_100	07_08_2019	4	10:09:00	sun	5	3	0	0	0	0	0	0	0	0	0	0	0	3	3	0	0	0	0.6	0.6	0	0	0
1815_22	M	1	Large	LUVp_95_100	06_08_2019	2	10:15:00	sun	5	3	0	0	0	0	1	0	0	0	1	0	0	5	3	1	0	1	1	0.6	0.2	0	0.2
1822_18	O	1	Large	LUVp_95_100	07_08_2019	9	10:15:00	sun	5	1	1	0	3	0	0	0	0	0	0	0	0	5	2	3	0	0	1	0.4	0.6	0	0
1797_3	O	1	Large	LUVp_95_100	06_08_2019	6	10:18:00	sun	5	7	4	0	0	0	0	0	0	0	0	0	0	11	11	0	0	0	2.2	2.2	0	0	0
1805_3	A	1	Large	LUVp_95_100	07_08_2019	4	10:18:00	sun	5	1	2	0	0	0	0	0	0	0	0	0	0	3	3	0	0	0	0.6	0.6	0	0	0
1802_17	A	0.988918	Large	LUVp_95_100	06_08_2019	10	10:22:00	sun	5	5	0	0	0	0	0	0	0	0	0	0	0	5	5	0	0	0	1	1	0	0	0
1805_16	O	1	Large	LUVp_95_100	06_08_2019	5	10:24:00	sun	5	4	0	0	1	0	0	0	0	0	0	0	0	5	4	1	0	0	1	0.8	0.2	0	0
PI_27_4	A	1	Large	LUVp_95_100	07_08_2019	5	10:24:00	sun	5	2	1	0	2	0	0	0	0	0	0	0	0	5	3	2	0	0	1	0.6	0.4	0	0
1815_22	O	1	Large	LUVp_95_100	07_08_2019	3	10:27:00	sun	5	1	0	0	0	0	0	0	0	0	0	0	0	1	1	0	0	0	0.2	0.2	0	0	0
1831_11	A	1	Large	LUVp_95_100	06_08_2019	7	10:28:00	sun	5	5	2	1	2	0	0	0	0	0	0	0	0	10	8	2	0	0	2	1.6	0.4	0	0
1817_7	A	1	Large	LUVp_95_100	06_08_2019	3	10:34:00	sun	5	1	3	0	0	0	0	0	0	0	0	0	0	4	4	0	0	0	0.8	0.8	0	0	0
1831_13	M	1	Large	LUVp_95_100	06_08_2019	6	10:41:00	sun	5	6	0	0	0	0	0	0	0	0	0	0	0	6	6	0	0	0	1.2	1.2	0	0	0
1854_18	A	0.985313	Large	LUVp_95_100	06_08_2019	7	10:48:00	sun	5	11	5	0	0	0	0	0	0	0	0	0	0	16	16	0	0	0	3.2	3.2	0	0	0
1805_12	A	1	Large	LUVp_95_100	06_08_2019	5	10:54:00	sun	5	1	1	0	0	0	0	0	0	0	0	1	0	3	2	0	0	1	0.6	0.4	0	0	0.2
PI_36_29	O	1	Large	LUVp_95_100	06_08_2019	5	10:54:00	sun	5	2	0	0	0	0	0	0	0	0	0	0	0	2	2	0	0	0	0.4	0.4	0	0	0
1815_22	A	1	Large	LUVp_95_100	29_07_2019	2	11:00:00	sun	5	1	1	0	2	0	0	0	0	0	0	0	0	4	2	2	0	0	0.8	0.4	0.4	0	0
1831_11	E	1	Large	LUVp_95_100	29_07_2019	3	11:00:00	sun	5	2	1	0	0	0	0	1	0	0	0	0	0	4	3	0	1	0	0.8	0.6	0	0.2	0
AMES_2_3	A	1	Large	LUVp_95_100	29_07_2019	5	11:00:00	sun	5	2	0	0	1	0	0	0	0	0	0	0	0	3	2	1	0	0	0.6	0.4	0.2	0	0
1831_13	A	1	Large	LUVp_95_100	29_07_2019	3	11:11:00	sun	5	0	0	0	0	0	0	0	0	0	0	0	0	0	0	0	0	0	0	0	0	0	0
1854_18	E	0.985313	Large	LUVp_95_100	29_07_2019	2	11:11:00	sun	5	1	1	0	0	0	0	0	0	0	0	0	0	2	2	0	0	0	0.4	0.4	0	0	0
PI_34_5	M	1	Large	LUVp_95_100	29_07_2019	5	11:21:00	sun	5	2	0	0	0	0	0	0	0	0	0	0	0	2	2	0	0	0	0.4	0.4	0	0	0
PI_39_4	E	1	Large	LUVp_95_100	29_07_2019	6	11:23:00	sun	5	1	0	0	1	2	0	0	0	0	0	0	0	4	1	3	0	0	0.8	0.2	0.6	0	0
1797_3	O	1	Large	LUVp_95_100	29_07_2019	2	11:36:00	sun	5	2	1	0	1	0	0	0	0	0	0	0	0	4	3	1	0	0	0.8	0.6	0.2	0	0
1805_16	O	1	Large	LUVp_95_100	29_07_2019	2	11:42:00	sun	5	2	0	0	0	0	0	0	0	0	0	0	0	2	2	0	0	0	0.4	0.4	0	0	0
PI_34_1	M	1	Large	LUVp_95_100	29_07_2019	9	11:42:00	sun	5	4	0	0	0	0	0	0	0	0	0	0	0	4	4	0	0	0	0.8	0.8	0	0	0
1815_22	A	1	Large	LUVp_95_100	29_07_2019	2	13:00:00	sun	5	0	1	0	1	1	0	0	0	0	0	0	0	3	1	2	0	0	0.6	0.2	0.4	0	0
1831_11	E	1	Large	LUVp_95_100	29_07_2019	3	13:00:00	sun	5	1	1	0	0	0	0	0	0	0	0	0	0	2	2	0	0	0	0.4	0.4	0	0	0
1802_25	A	1	Large	LUVp_95_100	07_08_2019	3	13:02:00	sun	5	5	0	1	0	0	0	0	0	0	0	0	0	6	6	0	0	0	1.2	1.2	0	0	0
AMES_2_3	A	1	Large	LUVp_95_100	29_07_2019	5	13:05:00	sun	5	5	1	0	3	0	0	0	0	0	0	0	0	9	6	3	0	0	1.8	1.2	0.6	0	0
1805_30	J	1	Large	LUVp_95_100	09_07_2019	3	13:10:00	sun	5	3	0	0	0	0	0	0	0	0	0	0	0	3	3	0	0	0	0.6	0.6	0	0	0
PI_34_5	M	1	Large	LUVp_95_100	29_07_2019	5	13:10:00	sun	5	1	0	0	0	0	0	0	0	0	0	0	0	1	1	0	0	0	0.2	0.2	0	0	0
1831_13	A	1	Large	LUVp_95_100	29_07_2019	3	13:11:00	sun	5	1	2	0	0	0	0	0	0	0	0	0	0	3	3	0	0	0	0.6	0.6	0	0	0
1854_18	E	0.985313	Large	LUVp_95_100	29_07_2019	2	13:11:00	sun	5	2	2	0	0	0	0	0	0	0	0	0	0	4	4	0	0	0	0.8	0.8	0	0	0
PI_39_4	E	1	Large	LUVp_95_100	29_07_2019	6	13:22:00	sun	5	0	0	0	0	0	0	0	0	0	0	0	0	0	0	0	0	0	0	0	0	0	0
1827_16	A	1	Large	LUVp_95_100	07_08_2019	3	13:23:00	sun	5	0	0	0	2	1	0	0	0	0	0	0	0	3	0	3	0	0	0.6	0	0.6	0	0
1815_15	J	1	Large	LUVp_95_100	09_07_2019	2	13:25:00	sun	5	0	0	0	1	0	0	0	0	0	0	0	0	1	0	1	0	0	0.2	0	0.2	0	0
PI_34_1	M	1	Large	LUVp_95_100	29_07_2019	9	13:30:00	sun	5	2	0	0	0	0	0	0	0	0	0	0	0	2	2	0	0	0	0.4	0.4	0	0	0
1797_3	O	1	Large	LUVp_95_100	29_07_2019	2	13:36:00	sun	5	3	2	0	0	0	0	0	0	0	0	0	0	5	5	0	0	0	1	1	0	0	0
1805_16	O	1	Large	LUVp_95_100	29_07_2019	2	13:42:00	sun	5	3	0	0	0	1	0	0	0	0	0	0	0	4	3	1	0	0	0.8	0.6	0.2	0	0
1817_7	O	1	Large	LUVp_95_100	07_08_2019	2	13:42:00	sun	5	4	1	0	0	0	0	0	0	0	0	0	0	5	5	0	0	0	1	1	0	0	0
1815_22	A	1	Large	LUVp_95_100	31_07_2019	2	13:50:00	sun/overcast	5	2	0	0	1	1	0	0	0	0	0	0	0	4	2	2	0	0	0.8	0.4	0.4	0	0
1805_12	O	1	Large	LUVp_95_100	07_08_2019	5	13:54:00	sun	5	3	2	0	0	0	0	0	0	0	0	0	0	5	5	0	0	0	1	1	0	0	0
PI_34_55	O	1	Large	LUVp_95_100	06_08_2019	9	13:54:00	sun	5	2	1	0	0	1	0	3	0	0	1	0	0	8	3	1	3	1	1.6	0.6	0.2	0.6	0.2
1827_9	A	1	Large	LUVp_95_100	07_08_2019	2	13:56:00	sun	5	1	0	0	0	0	0	0	0	0	0	0	0	1	1	0	0	0	0.2	0.2	0	0	0
1797_3	O	1	Large	LUVp_95_100	06_08_2019	6	14:06:00	sun	5	2	2	0	0	1	0	0	0	0	0	0	0	5	4	1	0	0	1	0.8	0.2	0	0
1797_7	O	1	Large	LUVp_95_100	07_08_2019	4	14:06:00	sun	5	0	0	0	0	0	0	0	0	0	0	0	0	0	0	0	0	0	0	0	0	0	0
1802_17	A	0.988918	Large	LUVp_95_100	06_08_2019	10	14:07:00	sun	5	7	0	0	0	0	0	0	0	0	0	0	0	7	7	0	0	0	1.4	1.4	0	0	0
1805_3	A	1	Large	LUVp_95_100	07_08_2019	4	14:08:00	sun	5	0	0	0	0	0	0	0	0	0	0	0	0	0	0	0	0	0	0	0	0	0	0
1815_22	Q	1	Large	LUVp_95_100	06_08_2019	2	14:08:00	sun	5	1	0	0	3	0	0	0	0	0	0	0	0	4	1	3	0	0	0.8	0.2	0.6	0	0
1822_18	A	1	Large	LUVp_95_100	31_07_2019	2	14:08:00	sun/overcast	5	2	1	0	0	0	0	1	0	0	0	0	0	4	3	0	1	0	0.8	0.6	0	0.2	0
PI_34_55	J	1	Large	LUVp_95_100	09_07_2019	8	14:08:00	sun	5	2	4	0	0	0	0	0	0	0	0	0	0	6	6	0	0	0	1.2	1.2	0	0	0
PI_34_55	M	1	Large	LUVp_95_100	30_07_2019	4	14:11:00	sun/overcast	5	0	0	0	0	0	0	1	0	0	0	0	0	1	0	0	1	0	0.2	0	0	0.2	0
1805_16	O	1	Large	LUVp_95_100	06_08_2019	5	14:12:00	sun	5	5	0	0	1	0	0	0	0	0	0	0	0	6	5	1	0	0	1.2	1	0.2	0	0
1822_18	O	1	Large	LUVp_95_100	07_08_2019	9	14:12:00	sun	5	3	1	0	3	0	0	0	0	0	0	0	0	7	4	3	0	0	1.4	0.8	0.6	0	0
1831_11	A	1	Large	LUVp_95_100	06_08_2019	7	14:13:00	sun	5	7	2	0	2	0	0	0	0	0	0	0	0	11	9	2	0	0	2.2	1.8	0.4	0	0
PI_27_4	A	1	Large	LUVp_95_100	07_08_2019	5	14:13:00	sun	5	1	1	1	5	0	0	0	0	0	0	0	0	8	3	5	0	0	1.6	0.6	1	0	0
PI_27_4	O	1	Large	LUVp_95_100	31_07_2019	2	14:13:00	sun/overcast	5	2	0	0	2	0	0	0	0	0	0	0	0	4	2	2	0	0	0.8	0.4	0.4	0	0
1802_17	E	0.988918	Large	LUVp_95_100	31_07_2019	3	14:16:00	overcast	5	1	0	0	0	2	0	1	0	0	0	0	0	4	1	2	1	0	0.8	0.2	0.4	0.2	0
1817_7	A	1	Large	LUVp_95_100	06_08_2019	3	14:18:00	sun	5	4	0	1	0	0	0	0	0	0	0	0	0	5	5	0	0	0	1	1	0	0	0
1831_11	E	1	Large	LUVp_95_100	31_07_2019	3	14:21:00	overcast	5	3	2	0	0	1	0	0	0	0	0	0	0	6	5	1	0	0	1.2	1	0.2	0	0
1831_13	A	1	Large	LUVp_95_100	31_07_2019	6	14:21:00	sun/overcast	5	2	0	0	0	0	0	0	0	0	0	0	0	2	2	0	0	0	0.4	0.4	0	0	0
1797_3	M	1	Large	LUVp_95_100	30_07_2019	3	14:22:00	sun/overcast	5	3	0	0	1	0	0	0	0	0	0	0	0	4	3	1	0	0	0.8	0.6	0.2	0	0
1815_22	O	1	Large	LUVp_95_100	07_08_2019	3	14:24:00	sun	5	1	1	0	1	0	0	0	0	0	0	0	0	3	2	1	0	0	0.6	0.4	0.2	0	0
PI_26_16	O	0.974072	Large	LUVp_95_100	31_07_2019	3	14:24:00	sun/overcast	5	2	3	0	1	0	0	0	0	0	0	0	0	6	5	1	0	0	1.2	1	0.2	0	0
1805_16	J	1	Large	LUVp_95_100	09_07_2019	6	14:27:00	sun	5	1	0	0	2	0	0	0	0	0	0	0	0	3	1	2	0	0	0.6	0.2	0.4	0	0
1805_16	M	1	Large	LUVp_95_100	30_07_2019	2	14:28:00	sun/overcast	5	3	0	0	0	0	0	0	0	0	0	0	0	3	3	0	0	0	0.6	0.6	0	0	0
1854_18	A	0.985313	Large	LUVp_95_100	06_08_2019	7	14:29:00	sun	5	12	6	2	0	0	0	0	0	0	0	0	0	20	20	0	0	0	4	4	0	0	0
1797_3	J	1	Large	LUVp_95_100	09_07_2019	6	14:34:00	sun	5	9	4	0	0	0	0	0	0	0	0	0	0	13	13	0	0	0	2.6	2.6	0	0	0
1805_12	A	1	Large	LUVp_95_100	06_08_2019	5	14:35:00	sun	5	3	0	1	0	0	0	0	0	0	0	0	0	4	4	0	0	0	0.8	0.8	0	0	0
1854_18	E	0.985313	Large	LUVp_95_100	31_07_2019	3	14:39:00	overcast	5	1	0	0	0	0	0	0	0	0	0	0	0	1	1	0	0	0	0.2	0.2	0	0	0
PI_39_4	A	1	Large	LUVp_95_100	31_07_2019	8	14:39:00	sun/overcast	5	4	1	0	1	1	0	0	0	0	0	0	0	7	5	2	0	0	1.4	1	0.4	0	0
PI_36_29	O	1	Large	LUVp_95_100	06_08_2019	5	14:41:00	sun	5	2	0	0	2	0	0	0	0	0	0	0	0	4	2	2	0	0	0.8	0.4	0.4	0	0
1797_7	A	1	Large	LUVp_95_100	31_07_2019	2	14:45:00	sun/overcast	5	0	0	0	0	0	0	3	0	0	0	0	0	3	0	0	3	0	0.6	0	0	0.6	0
1805_12	E	1	Large	LUVp_95_100	31_07_2019	3	14:45:00	overcast	5	1	0	0	0	0	0	1	0	0	0	0	0	2	1	0	1	0	0.4	0.2	0	0.2	0
AMES_2_3	A	1	Large	LUVp_95_100	31_07_2019	7	14:56:00	sun/overcast	5	5	1	0	3	0	0	0	0	0	0	0	0	9	6	3	0	0	1.8	1.2	0.6	0	0
PI_36_29	M	1	Large	LUVp_95_100	30_07_2019	3	14:58:00	sun/overcast	5	0	1	0	0	0	0	0	0	0	0	0	0	1	1	0	0	0	0.2	0.2	0	0	0
1815_22	A	1	Large	LUVp_95_100	29_07_2019	2	15:00:00	sun	5	1	0	0	2	0	0	0	0	0	0	0	0	3	1	2	0	0	0.6	0.2	0.4	0	0
1831_11	E	1	Large	LUVp_95_100	29_07_2019	3	15:00:00	sun	5	1	2	0	0	0	0	0	0	0	0	0	0	3	3	0	0	0	0.6	0.6	0	0	0
AMES_2_3	A	1	Large	LUVp_95_100	29_07_2019	5	15:05:00	sun	5	4	0	0	4	1	0	0	0	0	0	0	0	9	4	5	0	0	1.8	0.8	1	0	0
PI_34_5	M	1	Large	LUVp_95_100	29_07_2019	5	15:08:00	sun	5	3	0	0	0	0	0	0	0	0	0	0	0	3	3	0	0	0	0.6	0.6	0	0	0
1831_13	A	1	Large	LUVp_95_100	29_07_2019	3	15:10:00	sun	5	2	0	0	0	0	0	0	0	0	0	0	0	2	2	0	0	0	0.4	0.4	0	0	0
1854_18	E	0.985313	Large	LUVp_95_100	29_07_2019	2	15:11:00	sun	5	0	1	0	0	0	0	0	0	0	0	0	0	1	1	0	0	0	0.2	0.2	0	0	0
PI_39_4	E	1	Large	LUVp_95_100	29_07_2019	6	15:22:00	sun	5	1	0	0	1	0	0	0	0	0	0	0	0	2	1	1	0	0	0.4	0.2	0.2	0	0
PI_34_1	M	1	Large	LUVp_95_100	29_07_2019	9	15:31:00	sun	5	6	0	0	0	0	0	0	0	0	0	0	0	6	6	0	0	0	1.2	1.2	0	0	0
1797_3	O	1	Large	LUVp_95_100	29_07_2019	2	15:36:00	sun	5	4	0	0	0	0	0	0	0	0	0	0	0	4	4	0	0	0	0.8	0.8	0	0	0
1805_16	O	1	Large	LUVp_95_100	29_07_2019	2	15:42:00	sun	5	0	0	0	0	1	0	0	0	0	0	0	0	1	0	1	0	0	0.2	0	0.2	0	0

## Sheet: Statistical analyses
Comparisons for the pollinator visitations experiment performed in Vancouver in 2017
Two-sided Mann-Whitney U-test: P = 0.017, W = 150
Comparisons for the pollinator visitations experiment performed in Vancouver in 2019
Kruskal-Wallis test: P = 0.0058, χ2 = 14.54, df = 4
Wilcoxon rank sum test:
	LUVp < 0.15	LUVp = 0.15 - 0.3	LUVp = 0.5 - 0.8
LUVp = 0.15 - 0.3	0.018	-	-
LUVp = 0.5 - 0.8	0.018	0.279	-
LUVp > 0.95	0.063	0.079	0.018
