# Supplementary material for: Genetic basis and dual adaptive role of floral pigmentation in sunflowers
Source: eLife. 2022 Jan 18;11:e72072. doi: 10.7554/eLife.72072 (PMC8765750; doi:10.7554/eLife.72072)
Supplement: Figure 4—source data 2. [file elife-72072-fig4-data2.xlsx]

## Sheet: Sheet1
Figure 4 - source data 2: Temperature measurements from infrared pictures for individual detached ligules.
Ligules were exposed to sunlight, and tempearture was measured from infrared pictures for pairs of ligules with contrasting floral UV patterns at a time. Images at time = 0 were taken in a temperature-controlled room, under neon light.
Pair number	Individual	LUVp category	Population of origin	Location of origin	Time (minutes)	Minimum Temperature (ºC)	Average Temperature (ºC)	Maximum Temperature (ºC)
1	ANN826_GH2019-6	Large	ANN_03	California	0	21.67	22.02	22.22
					5	20.61	23.48	24.49
					10	23.01	26.13	27.26
					15	23.92	26.71	27.8
	ANN1346_GH2019-2	Small	ANN_55	Texas	0	21.58	21.88	22.15
					5	20.54	23.24	24.54
					10	23.58	26.06	27.36
					15	23.82	26.36	27.55
2	ANN0957_GH2019-1	Large	ANN_16	New Mexico	0	20.43	21.03	21.64
					5	21.47	23.63	25.41
					10	23.23	24.96	26.8
					15	23.35	25.17	26.82
	ANN1372_GH2019-1	Small	ANN_58	Texas	0	21.5	21.8	21.97
					5	22.43	24.6	25.8
					10	23.86	25.99	27.25
					15	23.69	25.93	27.19
3	ANN0981_GH2019-3	Large	ANN_19	New Mexico	0	21.7	22.17	22.56
					5	20.84	22.95	26.13
					10	22.86	24.41	26.4
					15	23.38	25.24	27.15
	ANN1372_GH2019-2	Small	ANN_58	Texas	0	22.12	22.38	22.8
					5	22.13	24.77	26.1
					10	23.36	25.73	27.02
					15	23.58	25.96	27.23
4	ANN0981_GH2019-3	Large	ANN_19	New Mexico	0	21.34	21.99	22.25
					5	21.44	24.7	25.67
					10	23.32	26.82	27.91
					15	23.72	26.79	27.73
	ANN1372_GH2019-2	Small	ANN_58	Texas	0	21.37	21.8	22.21
					5	22.38	24.29	25.47
					10	23.6	26.09	27.4
					15	23.07	26.09	27.45
5	ANN0957_GH2019-3	Large	ANN_16	New Mexico	0	20.28	21.18	22.07
					5	22.46	25.54	26.55
					10	24.38	27.31	28.6
					15	23.47	27.35	28.46
	ANN1346_GH2019-2	Small	ANN_55	Texas	0	20.47	21.45	22
					5	22.61	25.31	26.53
					10	24.07	27.25	28.69
					15	24.39	27.51	28.89
