# Supplementary material for: Genetic basis and dual adaptive role of floral pigmentation in sunflowers
Source: eLife. 2022 Jan 18;11:e72072. doi: 10.7554/eLife.72072 (PMC8765750; doi:10.7554/eLife.72072)
Supplement: Supplementary file 5. [file elife-72072-supp5.xlsx]

## Sheet: Sheet1
Supplementary File 5: GenBank dataset information for HaMYB111 region sequences.
GenBank accession number	Species	Sample ID	Population ID	Population accession nr.	Country	State/Province	Sequence type	Sequencing technology	Author	Sequence length (bp)	URL
MZ410295	Helianthus annuus	5-43	ANN_55	PI 695761	United States	Texas	HaMYB111 complete cDNA, from individual with small LUVp	Sanger (cloned PCR product)	Marco Todesco	894	https://www.ncbi.nlm.nih.gov/nuccore/MZ410295
MZ410296	Helianthus annuus	8-12	ANN_03	PI 695649	United States	California	HaMYB111 complete cDNA, from individual with large LUVp	Sanger (cloned PCR product)	Marco Todesco	885	https://www.ncbi.nlm.nih.gov/nuccore/MZ410296
MZ597473	Helianthus annuus	ANN0804	ANN_01	PI 695647	United States	California	HaMYB111 gene, complete cds	Sanger (cloned PCR product)	Marco Todesco	4314	https://www.ncbi.nlm.nih.gov/nuccore/MZ597473
MZ597474	Helianthus annuus	ANN0825	ANN_03	PI 695649	United States	California	HaMYB111 gene, complete cds	Sanger (cloned PCR product)	Marco Todesco	4339	https://www.ncbi.nlm.nih.gov/nuccore/MZ597474
MZ597475	Helianthus annuus	ANN0851	ANN_06	PI 695652	United States	California	HaMYB111 gene, complete cds	Sanger (cloned PCR product)	Marco Todesco	5306	https://www.ncbi.nlm.nih.gov/nuccore/MZ597475
MZ597476	Helianthus annuus	ANN0851	ANN_06	PI 695652	United States	California	HaMYB111 gene, complete cds (alternate allele)	Sanger (cloned PCR product)	Marco Todesco	4072	https://www.ncbi.nlm.nih.gov/nuccore/MZ597476
MZ597477	Helianthus annuus	ANN0860	ANN_06	PI 695652	United States	California	HaMYB111 gene, complete cds	Sanger (cloned PCR product)	Marco Todesco	4331	https://www.ncbi.nlm.nih.gov/nuccore/MZ597477
MZ597478	Helianthus annuus	ANN0951	ANN_16	PI 695667	United States	New Mexico	HaMYB111 gene, complete cds	Sanger (cloned PCR product)	Marco Todesco	3657	https://www.ncbi.nlm.nih.gov/nuccore/MZ597478
MZ597479	Helianthus annuus	ANN0975	ANN_18	PI 695670	United States	New Mexico	HaMYB111 gene, complete cds	Sanger (cloned PCR product)	Marco Todesco	4107	https://www.ncbi.nlm.nih.gov/nuccore/MZ597479
MZ597480	Helianthus annuus	ANN1099	ANN_30	PI 695689	United States	Utah	HaMYB111 gene, complete cds	Sanger (cloned PCR product)	Marco Todesco	4858	https://www.ncbi.nlm.nih.gov/nuccore/MZ597480
MZ597481	Helianthus annuus	ANN1099	ANN_30	PI 695689	United States	Utah	HaMYB111 gene, complete cds (alternate allele)	Sanger (cloned PCR product)	Marco Todesco	4431	https://www.ncbi.nlm.nih.gov/nuccore/MZ597481
MZ597482	Helianthus annuus	ANN1100	ANN_30	PI 695689	United States	Utah	HaMYB111 gene, complete cds	Sanger (cloned PCR product)	Marco Todesco	4362	https://www.ncbi.nlm.nih.gov/nuccore/MZ597482
MZ597483	Helianthus annuus	ANN1203	ANN_41	PI 695715	United States	Oklahoma	HaMYB111 gene, complete cds	Sanger (cloned PCR product)	Marco Todesco	4305	https://www.ncbi.nlm.nih.gov/nuccore/MZ597483
MZ597484	Helianthus annuus	ANN1208	ANN_41	PI 695715	United States	Oklahoma	HaMYB111 gene, complete cds	Sanger (cloned PCR product)	Marco Todesco	4153	https://www.ncbi.nlm.nih.gov/nuccore/MZ597484
MZ597485	Helianthus annuus	ANN1221	ANN_43	PI 695720	United States	Texas	HaMYB111 gene, complete cds	Sanger (cloned PCR product)	Marco Todesco	4685	https://www.ncbi.nlm.nih.gov/nuccore/MZ597485
MZ597486	Helianthus annuus	ANN1249	ANN_45	PI 695725	United States	Texas	HaMYB111 gene, complete cds	Sanger (cloned PCR product)	Marco Todesco	3062	https://www.ncbi.nlm.nih.gov/nuccore/MZ597486
MZ597487	Helianthus annuus	ANN1260	ANN_46	PI 695726	United States	California	HaMYB111 gene, complete cds	Sanger (cloned PCR product)	Marco Todesco	3904	https://www.ncbi.nlm.nih.gov/nuccore/MZ597487
MZ597488	Helianthus annuus	ANN1260	ANN_46	PI 695726	United States	California	HaMYB111 gene, complete cds (alternate allele)	Sanger (cloned PCR product)	Marco Todesco	4140	https://www.ncbi.nlm.nih.gov/nuccore/MZ597488
MZ597489	Helianthus annuus	ANN1347	ANN_55	PI 695761	United States	Texas	HaMYB111 gene, complete cds	Sanger (cloned PCR product)	Marco Todesco	5674	https://www.ncbi.nlm.nih.gov/nuccore/MZ597489
MZ597490	Helianthus annuus	ANN1372	ANN_58	PI 695778	United States	Texas	HaMYB111 gene, complete cds	Sanger (cloned PCR product)	Marco Todesco	4049	https://www.ncbi.nlm.nih.gov/nuccore/MZ597490
MZ597491	Helianthus annuus	ANN0804	ANN_01	PI 695647	United States	California	HaMYB111 putative proximal promoter region, partial gene	Sanger (cloned PCR product)	Marco Todesco	5464	https://www.ncbi.nlm.nih.gov/nuccore/MZ597491
MZ597492	Helianthus annuus	ANN0851	ANN_06	PI 695652	United States	California	HaMYB111 putative proximal promoter region	Sanger (cloned PCR product)	Marco Todesco	2839	https://www.ncbi.nlm.nih.gov/nuccore/MZ597492
MZ597493	Helianthus annuus	ANN0860	ANN_06	PI 695652	United States	California	HaMYB111 putative proximal promoter region	Sanger (cloned PCR product)	Marco Todesco	3683	https://www.ncbi.nlm.nih.gov/nuccore/MZ597493
MZ597494	Helianthus annuus	ANN0904	ANN_11	PI 695657	United States	Arizona	HaMYB111 putative proximal promoter region, partial gene	Sanger (cloned PCR product)	Marco Todesco	4925	https://www.ncbi.nlm.nih.gov/nuccore/MZ597494
MZ597495	Helianthus annuus	ANN0951	ANN_16	PI 695667	United States	New Mexico	HaMYB111 putative proximal promoter region	Sanger (cloned PCR product)	Marco Todesco	5362	https://www.ncbi.nlm.nih.gov/nuccore/MZ597495
MZ597496	Helianthus annuus	ANN0975	ANN_18	PI 695670	United States	New Mexico	HaMYB111 putative proximal promoter region	Sanger (cloned PCR product)	Marco Todesco	5429	https://www.ncbi.nlm.nih.gov/nuccore/MZ597496
MZ597497	Helianthus annuus	ANN0977	ANN_18	PI 695670	United States	New Mexico	HaMYB111 putative proximal promoter region, partial gene	Sanger (cloned PCR product)	Marco Todesco	6827	https://www.ncbi.nlm.nih.gov/nuccore/MZ597497
MZ597498	Helianthus annuus	ANN1099	ANN_30	PI 695689	United States	Utah	HaMYB111 putative proximal promoter region	Sanger (cloned PCR product)	Marco Todesco	4687	https://www.ncbi.nlm.nih.gov/nuccore/MZ597498
MZ597499	Helianthus annuus	ANN1221	ANN_43	PI 695720	United States	Texas	HaMYB111 putative proximal promoter region, partial gene	Sanger (cloned PCR product)	Marco Todesco	5003	https://www.ncbi.nlm.nih.gov/nuccore/MZ597499
MZ597500	Helianthus annuus	ANN1260	ANN_46	PI 695726	United States	California	HaMYB111 putative proximal promoter region, partial gene	Sanger (cloned PCR product)	Marco Todesco	4327	https://www.ncbi.nlm.nih.gov/nuccore/MZ597500
MZ597501	Helianthus annuus	ANN1265	ANN_47	PI 695727	United States	Arizona	HaMYB111 putative proximal promoter region	Sanger (cloned PCR product)	Marco Todesco	2574	https://www.ncbi.nlm.nih.gov/nuccore/MZ597501
MZ597502	Helianthus annuus	ANN1346	ANN_55	PI 695761	United States	Texas	HaMYB111 putative proximal promoter region	Sanger (cloned PCR product)	Marco Todesco	2107	https://www.ncbi.nlm.nih.gov/nuccore/MZ597502
MZ597503	Helianthus annuus	ANN1347	ANN_55	PI 695761	United States	Texas	HaMYB111 putative proximal promoter region, partial gene	Sanger (cloned PCR product)	Marco Todesco	5378	https://www.ncbi.nlm.nih.gov/nuccore/MZ597503
MZ597504	Helianthus annuus	ANN1347	ANN_55	PI 695761	United States	Texas	HaMYB111 putative proximal promoter region, partial gene (alternate allele)	Sanger (cloned PCR product)	Marco Todesco	5709	https://www.ncbi.nlm.nih.gov/nuccore/MZ597504
MZ597505	Helianthus annuus	ANN1372	ANN_58	PI 695778	United States	Texas	HaMYB111 putative proximal promoter region, partial gene	Sanger (cloned PCR product)	Marco Todesco	3873	https://www.ncbi.nlm.nih.gov/nuccore/MZ597505
MZ597506	Helianthus petiolaris	PET0461	PET_17	PI 695700	United States	Colorado	HaMYB111 putative proximal promoter region	Sanger (cloned PCR product)	Marco Todesco	5641	https://www.ncbi.nlm.nih.gov/nuccore/MZ597506
MZ597507	Helianthus petiolaris	PET0592	PET_30	PI 695717	United States	Oklahoma	HaMYB111 putative proximal promoter region, partial gene	Sanger (cloned PCR product)	Marco Todesco	6227	https://www.ncbi.nlm.nih.gov/nuccore/MZ597507
MZ597508	Helianthus petiolaris	PET0604	PET_31	PI 695718	United States	Texas	HaMYB111 putative proximal promoter region, partial gene	Sanger (cloned PCR product)	Marco Todesco	5926	https://www.ncbi.nlm.nih.gov/nuccore/MZ597508
MZ597509	Helianthus petiolaris	PET0637	PET_34	PI 695732	United States	Arizona	HaMYB111 putative proximal promoter region, partial gene	Sanger (cloned PCR product)	Marco Todesco	6117	https://www.ncbi.nlm.nih.gov/nuccore/MZ597509
MZ597510	Helianthus petiolaris	PET0761	PET_47	PI 695751	United States	Texas	HaMYB111 putative proximal promoter region, partial gene	Sanger (cloned PCR product)	Marco Todesco	5776	https://www.ncbi.nlm.nih.gov/nuccore/MZ597510
MZ597511	Helianthus annuus	ANN0801	ANN_01	PI 695647	United States	California	HaMYB111 putative distal promoter region	Sanger (cloned PCR product)	Marco Todesco	4751	https://www.ncbi.nlm.nih.gov/nuccore/MZ597511
MZ597512	Helianthus annuus	ANN0804	ANN_01	PI 695647	United States	California	HaMYB111 putative distal promoter region	Sanger (cloned PCR product)	Marco Todesco	5546	https://www.ncbi.nlm.nih.gov/nuccore/MZ597512
MZ597513	Helianthus annuus	ANN0825	ANN_03	PI 695649	United States	California	HaMYB111 putative distal promoter region	Sanger (cloned PCR product)	Marco Todesco	961	https://www.ncbi.nlm.nih.gov/nuccore/MZ597513
MZ597514	Helianthus annuus	ANN0851	ANN_06	PI 695652	United States	California	HaMYB111 putative distal promoter region	Sanger (cloned PCR product)	Marco Todesco	3741	https://www.ncbi.nlm.nih.gov/nuccore/MZ597514
MZ597515	Helianthus annuus	ANN0851	ANN_06	PI 695652	United States	California	HaMYB111 putative distal promoter region (alternate allele)	Sanger (cloned PCR product)	Marco Todesco	1125	https://www.ncbi.nlm.nih.gov/nuccore/MZ597515
MZ597516	Helianthus annuus	ANN0860	ANN_06	PI 695652	United States	California	HaMYB111 putative distal promoter region	Sanger (cloned PCR product)	Marco Todesco	1431	https://www.ncbi.nlm.nih.gov/nuccore/MZ597516
MZ597517	Helianthus annuus	ANN0904	ANN_11	PI 695657	United States	Arizona	HaMYB111 putative distal promoter region	Sanger (cloned PCR product)	Marco Todesco	5426	https://www.ncbi.nlm.nih.gov/nuccore/MZ597517
MZ597518	Helianthus annuus	ANN0951	ANN_16	PI 695667	United States	New Mexico	HaMYB111 putative distal promoter region	Sanger (cloned PCR product)	Marco Todesco	3616	https://www.ncbi.nlm.nih.gov/nuccore/MZ597518
MZ597519	Helianthus annuus	ANN0977	ANN_18	PI 695670	United States	New Mexico	HaMYB111 putative distal promoter region	Sanger (cloned PCR product)	Marco Todesco	4749	https://www.ncbi.nlm.nih.gov/nuccore/MZ597519
MZ597520	Helianthus annuus	ANN1100	ANN_30	PI 695689	United States	Utah	HaMYB111 putative distal promoter region	Sanger (cloned PCR product)	Marco Todesco	4764	https://www.ncbi.nlm.nih.gov/nuccore/MZ597520
MZ597521	Helianthus annuus	ANN1203	ANN_41	PI 695715	United States	Oklahoma	HaMYB111 putative distal promoter region	Sanger (cloned PCR product)	Marco Todesco	4384	https://www.ncbi.nlm.nih.gov/nuccore/MZ597521
MZ597522	Helianthus annuus	ANN1208	ANN_41	PI 695715	United States	Oklahoma	HaMYB111 putative distal promoter region	Sanger (cloned PCR product)	Marco Todesco	5279	https://www.ncbi.nlm.nih.gov/nuccore/MZ597522
MZ597523	Helianthus annuus	ANN1221	ANN_43	PI 695720	United States	Texas	HaMYB111 putative distal promoter region	Sanger (cloned PCR product)	Marco Todesco	3974	https://www.ncbi.nlm.nih.gov/nuccore/MZ597523
MZ597524	Helianthus annuus	ANN1265	ANN_47	PI 695727	United States	Arizona	HaMYB111 putative distal promoter region	Sanger (cloned PCR product)	Marco Todesco	4099	https://www.ncbi.nlm.nih.gov/nuccore/MZ597524
MZ597525	Helianthus annuus	ANN1346	ANN_55	PI 695761	United States	Texas	HaMYB111 putative distal promoter region	Sanger (cloned PCR product)	Marco Todesco	3841	https://www.ncbi.nlm.nih.gov/nuccore/MZ597525
MZ597526	Helianthus argophyllus	ARG0006	ARG_01	PI 695721	United States	Texas	HaMYB111 putative distal promoter region	Sanger (cloned PCR product)	Marco Todesco	1552	https://www.ncbi.nlm.nih.gov/nuccore/MZ597526
MZ597527	Helianthus argophyllus	ARG0079	ARG_08	PI 695760	United States	Texas	HaMYB111 putative distal promoter region	Sanger (cloned PCR product)	Marco Todesco	1552	https://www.ncbi.nlm.nih.gov/nuccore/MZ597527
MZ597528	Helianthus argophyllus	ARG0090	ARG_09	PI 695762	United States	Texas	HaMYB111 putative distal promoter region	Sanger (cloned PCR product)	Marco Todesco	1411	https://www.ncbi.nlm.nih.gov/nuccore/MZ597528
MZ597529	Helianthus argophyllus	ARG0143	ARG_15	PI 695769	United States	Texas	HaMYB111 putative distal promoter region	Sanger (cloned PCR product)	Marco Todesco	1130	https://www.ncbi.nlm.nih.gov/nuccore/MZ597529
MZ597530	Helianthus argophyllus	ARG0143	ARG_15	PI 695769	United States	Texas	HaMYB111 putative distal promoter region (alternate allele)	Sanger (cloned PCR product)	Marco Todesco	1547	https://www.ncbi.nlm.nih.gov/nuccore/MZ597530
MZ597531	Helianthus argophyllus	ARG0143	ARG_15	PI 695769	United States	Texas	HaMYB111 putative distal promoter region (second region)	Sanger (cloned PCR product)	Marco Todesco	2121	https://www.ncbi.nlm.nih.gov/nuccore/MZ597531
MZ597532	Helianthus argophyllus	ARG0203	ARG_21	PI 695776	United States	Texas	HaMYB111 putative distal promoter region	Sanger (cloned PCR product)	Marco Todesco	3958	https://www.ncbi.nlm.nih.gov/nuccore/MZ597532
MZ597533	Helianthus argophyllus	ARG022	ARG_23	PI 695779	United States	Texas	HaMYB111 putative distal promoter region	Sanger (cloned PCR product)	Marco Todesco	4102	https://www.ncbi.nlm.nih.gov/nuccore/MZ597533
MZ597534	Helianthus petiolaris	PET0592	PET_30	PI 695717	United States	Oklahoma	HaMYB111 putative distal promoter region	Sanger (cloned PCR product)	Marco Todesco	3172	https://www.ncbi.nlm.nih.gov/nuccore/MZ597534
MZ597535	Helianthus petiolaris	PET0637	PET_34	PI 695732	United States	Arizona	HaMYB111 putative distal promoter region	Sanger (cloned PCR product)	Marco Todesco	3513	https://www.ncbi.nlm.nih.gov/nuccore/MZ597535
MZ597536	Helianthus petiolaris	PET0761	PET_47	PI 695751	United States	Texas	HaMYB111 putative distal promoter region	Sanger (cloned PCR product)	Marco Todesco	6339	https://www.ncbi.nlm.nih.gov/nuccore/MZ597536
